# Supplementary material for: Rapid construction of γ-lactam containing 3,3-disubstituted oxindoles via a silver-catalyzed cascade radical bicyclization reaction
Source: Royal Society of Chemistry journal article supplement (doi:10.1039/d2qo01175a), 2022-01-01

# Rapid construction of $\gamma$ -lactam containing 3,3-disubstituted oxindoles *via* a silver-catalyzed cascade radical bicyclization reaction

Lin Xie,<sup>a</sup> Ruizhe Cao,<sup>a</sup> Yingxue Huang,<sup>a</sup> Qian Zhang,<sup>a,b</sup> Zeguo Fang<sup>\*a,b</sup> and Dong Li<sup>\*a,b</sup>

<sup>a</sup>Hubei Provincial Key Laboratory of Green Materials for Light Industry, Hubei University of Technology, Wuhan 430068, China

<sup>b</sup>New Materials and Green Manufacturing Talent Introduction and Innovation Demonstration Base, Hubei University of Technology, Wuhan 430068, China

## Supplementary Information

### Contents

|                                                                           |         |
|---------------------------------------------------------------------------|---------|
| Detailed Data for Optimization of Reaction Conditions                     | S1–S3   |
| Experimental Section                                                      | S3      |
| Instrumentation and Chemicals                                             | S3      |
| Preparation of Substrates                                                 | S3–S4   |
| Experimental Procedures                                                   | S4      |
| Large scale experiments                                                   | S4      |
| Characterization Data                                                     | S4–S12  |
| Copies of <sup>1</sup> H, <sup>13</sup> C and <sup>19</sup> F NMR spectra | S13–S53 |

### Detailed Data for Optimization of Reaction Conditions<sup>a</sup>

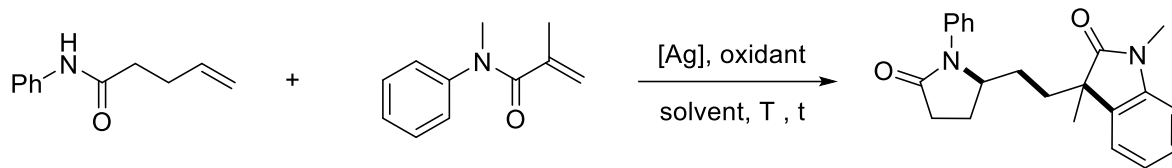

| entry           | <b>1a:2a</b> | [Ag]               | Oxidant (equiv)                                               | Solvent                                   | T (°C) | time (h) | Yield <b>3aa</b> <sup>b</sup> (%) |
|-----------------|--------------|--------------------|---------------------------------------------------------------|-------------------------------------------|--------|----------|-----------------------------------|
| 1               | 1:3          | Ag <sub>2</sub> O  | K <sub>2</sub> S <sub>2</sub> O <sub>8</sub>                  | CH <sub>3</sub> CN                        | 100    | 0.5      | 3                                 |
| 2               | 1:3          | Ag <sub>2</sub> O  | K <sub>2</sub> S <sub>2</sub> O <sub>8</sub>                  | H <sub>2</sub> O                          | 100    | 0.5      | 17                                |
| 3               | 1:3          | Ag <sub>2</sub> O  | K <sub>2</sub> S <sub>2</sub> O <sub>8</sub>                  | CH <sub>3</sub> CN/H <sub>2</sub> O (1:1) | 100    | 0.5      | 56                                |
| 4               | 1:3          | Ag <sub>2</sub> O  | K <sub>2</sub> S <sub>2</sub> O <sub>8</sub>                  | EtOAc/H <sub>2</sub> O (1:1)              | 100    | 0.5      | 5                                 |
| 5               | 1:3          | Ag <sub>2</sub> O  | K <sub>2</sub> S <sub>2</sub> O <sub>8</sub>                  | DCM/H <sub>2</sub> O (1:1)                | 100    | 0.5      | 30                                |
| 6               | 1:3          | Ag <sub>2</sub> O  | K <sub>2</sub> S <sub>2</sub> O <sub>8</sub>                  | DMF/H <sub>2</sub> O (1:1)                | 100    | 0.5      | 35                                |
| 7               | 1:3          | Ag <sub>2</sub> O  | K <sub>2</sub> S <sub>2</sub> O <sub>8</sub>                  | CHCl <sub>3</sub> /H <sub>2</sub> O (1:1) | 100    | 0.5      | 6                                 |
| 8               | 1:3          | Ag <sub>2</sub> O  | K <sub>2</sub> S <sub>2</sub> O <sub>8</sub>                  | DCE/H <sub>2</sub> O (1:1)                | 100    | 0.5      | 22                                |
| 9               | 1:3          | Ag <sub>2</sub> O  | K <sub>2</sub> S <sub>2</sub> O <sub>8</sub>                  | THF/H <sub>2</sub> O (1:1)                | 100    | 0.5      | 31                                |
| 10              | 1:3          | Ag <sub>2</sub> O  | K <sub>2</sub> S <sub>2</sub> O <sub>8</sub>                  | DMSO/H <sub>2</sub> O (1:1)               | 100    | 0.5      | 60                                |
| 11              | 1:3          | Ag <sub>2</sub> O  | K <sub>2</sub> S <sub>2</sub> O <sub>8</sub>                  | acetone/H <sub>2</sub> O (1:1)            | 100    | 0.5      | 62                                |
| 12              | 1:3          | Ag <sub>2</sub> O  | K <sub>2</sub> S <sub>2</sub> O <sub>8</sub>                  | acetone/H <sub>2</sub> O (1:3)            | 100    | 0.5      | 87                                |
| 13              | 1:3          | Ag <sub>2</sub> O  | K <sub>2</sub> S <sub>2</sub> O <sub>8</sub>                  | acetone/H <sub>2</sub> O (1:3)            | 100    | 1        | 78                                |
| 14              | 1:3          | Ag <sub>2</sub> O  | K <sub>2</sub> S <sub>2</sub> O <sub>8</sub>                  | acetone/H <sub>2</sub> O (1:3)            | 100    | 2        | 80                                |
| 15              | 1.5:1        | Ag <sub>2</sub> O  | K <sub>2</sub> S <sub>2</sub> O <sub>8</sub>                  | acetone/H <sub>2</sub> O (1:3)            | 100    | 0.5      | 65                                |
| 16              | 3:1          | Ag <sub>2</sub> O  | K <sub>2</sub> S <sub>2</sub> O <sub>8</sub>                  | acetone/H <sub>2</sub> O (1:3)            | 100    | 0.5      | 53                                |
| 17              | 1:1.5        | Ag <sub>2</sub> O  | K <sub>2</sub> S <sub>2</sub> O <sub>8</sub>                  | acetone/H <sub>2</sub> O (1:3)            | 100    | 0.5      | 62                                |
| 18              | 1:3          | AgOAc              | K <sub>2</sub> S <sub>2</sub> O <sub>8</sub>                  | acetone/H <sub>2</sub> O (1:3)            | 100    | 0.5      | 50                                |
| 19              | 1:3          | AgNO <sub>3</sub>  | K <sub>2</sub> S <sub>2</sub> O <sub>8</sub>                  | acetone/H <sub>2</sub> O (1:3)            | 100    | 0.5      | 40                                |
| 20              | 1:3          | AgTFA              | K <sub>2</sub> S <sub>2</sub> O <sub>8</sub>                  | acetone/H <sub>2</sub> O (1:3)            | 100    | 0.5      | 43                                |
| 21              | 1:3          | AgOTf              | K <sub>2</sub> S <sub>2</sub> O <sub>8</sub>                  | acetone/H <sub>2</sub> O (1:3)            | 100    | 0.5      | 36                                |
| 22              | 1:3          | AgO                | K <sub>2</sub> S <sub>2</sub> O <sub>8</sub>                  | acetone/H <sub>2</sub> O (1:3)            | 100    | 0.5      | 16                                |
| 23              | 1:3          | AgSbF <sub>6</sub> | K <sub>2</sub> S <sub>2</sub> O <sub>8</sub>                  | acetone/H <sub>2</sub> O (1:3)            | 100    | 0.5      | 26                                |
| 24              | 1:3          | AgF                | K <sub>2</sub> S <sub>2</sub> O <sub>8</sub>                  | acetone/H <sub>2</sub> O (1:3)            | 100    | 0.5      | 27                                |
| 25              | 1:3          | AgBF <sub>4</sub>  | K <sub>2</sub> S <sub>2</sub> O <sub>8</sub>                  | acetone/H <sub>2</sub> O (1:3)            | 100    | 0.5      | 50                                |
| 26              | 1:3          | -                  | K <sub>2</sub> S <sub>2</sub> O <sub>8</sub>                  | acetone/H <sub>2</sub> O (1:3)            | 100    | 0.5      | 10                                |
| 27 <sup>c</sup> | 1:3          | Ag <sub>2</sub> O  | K <sub>2</sub> S <sub>2</sub> O <sub>8</sub>                  | acetone/H <sub>2</sub> O (1:3)            | 100    | 0.5      | 52                                |
| 28 <sup>d</sup> | 1:3          | Ag <sub>2</sub> O  | K <sub>2</sub> S <sub>2</sub> O <sub>8</sub>                  | acetone/H <sub>2</sub> O (1:3)            | 100    | 0.5      | 70                                |
| 29              | 1:3          | Ag <sub>2</sub> O  | -                                                             | acetone/H <sub>2</sub> O (1:3)            | 100    | 0.5      | 0                                 |
| 30              | 1:3          | Ag <sub>2</sub> O  | Na <sub>2</sub> S <sub>2</sub> O <sub>8</sub>                 | acetone/H <sub>2</sub> O (1:3)            | 100    | 0.5      | 75                                |
| 31              | 1:3          | Ag <sub>2</sub> O  | (NH <sub>4</sub> ) <sub>2</sub> S <sub>2</sub> O <sub>8</sub> | acetone/H <sub>2</sub> O (1:3)            | 100    | 0.5      | 68                                |
| 32              | 1:3          | Ag <sub>2</sub> O  | Oxone                                                         | acetone/H <sub>2</sub> O (1:3)            | 100    | 0.5      | 12                                |
| 33              | 1:3          | Ag <sub>2</sub> O  | <i>m</i> -CPBA                                                | acetone/H <sub>2</sub> O (1:3)            | 100    | 0.5      | 0                                 |
| 34              | 1:3          | Ag <sub>2</sub> O  | DTBP                                                          | acetone/H <sub>2</sub> O (1:3)            | 100    | 0.5      | 0                                 |

|                 |     |                   |                                              |                                |     |     |    |
|-----------------|-----|-------------------|----------------------------------------------|--------------------------------|-----|-----|----|
| 35              | 1:3 | Ag <sub>2</sub> O | TBHP                                         | acetone/H <sub>2</sub> O (1:3) | 100 | 0.5 | 0  |
| 36              | 1:3 | Ag <sub>2</sub> O | PIDA                                         | acetone/H <sub>2</sub> O (1:3) | 100 | 0.5 | 0  |
| 37              | 1:3 | Ag <sub>2</sub> O | PIFA                                         | acetone/H <sub>2</sub> O (1:3) | 100 | 0.5 | 0  |
| 38 <sup>e</sup> | 1:3 | Ag <sub>2</sub> O | K <sub>2</sub> S <sub>2</sub> O <sub>8</sub> | acetone/H <sub>2</sub> O (1:3) | 100 | 0.5 | 67 |
| 39 <sup>f</sup> | 1:3 | Ag <sub>2</sub> O | K <sub>2</sub> S <sub>2</sub> O <sub>8</sub> | acetone/H <sub>2</sub> O (1:3) | 100 | 0.5 | 57 |
| 40              | 1:3 | Ag <sub>2</sub> O | K <sub>2</sub> S <sub>2</sub> O <sub>8</sub> | acetone/H <sub>2</sub> O (1:3) | 60  | 0.5 | 53 |
| 41              | 1:3 | Ag <sub>2</sub> O | K <sub>2</sub> S <sub>2</sub> O <sub>8</sub> | acetone/H <sub>2</sub> O (1:3) | 80  | 0.5 | 60 |
| 42              | 1:3 | Ag <sub>2</sub> O | K <sub>2</sub> S <sub>2</sub> O <sub>8</sub> | acetone/H <sub>2</sub> O (1:3) | 120 | 0.5 | 73 |

<sup>a</sup> Reaction conditions: 1a (0.2 mmol), Ag catalyst (0.2 equiv), oxidant (1.5 equiv) in solvent (2.0 mL). <sup>b</sup> Isolated yield. <sup>c</sup> 5% Ag<sub>2</sub>O equiv. <sup>d</sup> 1.5 equiv Ag<sub>2</sub>O. <sup>e</sup> 2 equiv K<sub>2</sub>S<sub>2</sub>O<sub>8</sub>. <sup>f</sup> 2.5 equiv K<sub>2</sub>S<sub>2</sub>O<sub>8</sub>.

## Experimental Section

### Instrumentation and chemicals.

<sup>1</sup>H NMR (400 MHz), <sup>13</sup>C NMR (100 MHz), and <sup>19</sup>F NMR (376 MHz) spectra were recorded on a Bruker NMR apparatus with CDCl<sub>3</sub> as the solvent. The chemical shifts are reported in  $\delta$  (ppm) values. <sup>1</sup>H NMR chemical shifts were determined relative to internal tetramethylsilane signal at  $\delta$  0.0. <sup>19</sup>F NMR chemical shifts were determined relative to external CFCl<sub>3</sub> at  $\delta$  0.0. Data for <sup>1</sup>H, <sup>13</sup>C, and <sup>19</sup>F NMR were recorded as follows: chemical shift ( $\delta$ , ppm), multiplicity (s = singlet, d = doublet, t = triplet, m = multiplet, dd = doublet of doublets, br = broad). Coupling constants (J) are reported in Hertz unit (Hz). Melting points were measured by SGW X-4A microscopic apparatus. HRMS was measured by Q Exactive Hybrid Quadrupole-Orbitrap LC/MS spectrometer.

The starting materials, including the aniline, 4-pentene acid, phosphorus oxychloride and triethylamine, were obtained from commercial sources such as Aladdin, Macklin, Alfa Aesar, Ourchem and used as received unless otherwise noted. The ethyl acetate and petroleum ether were used for column chromatography without further purification.

### Preparation of Substrates:

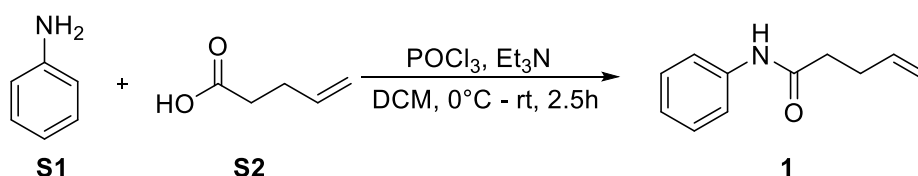

The substrates **1** were synthesized according to the known literature procedures<sup>1</sup>. Into a 250 mL round-bottom flask equipped with a magnetic stir-bar was added solution of aniline **S1** (1.0 g, 1 equiv) and triethylamine (2 equiv) in DCM (60 mL). The mixture was stirred at 0 °C. Then 4-pentene acid **S2** (1.2 equiv) was added. Phosphorus oxychloride (2 equiv) was added dropwise. The resulting solution was allowed to warm up to room temperature and stirred for 2 hours, followed by the addition of H<sub>2</sub>O (50 mL) to quench excess acid. The aqueous layer was further extracted by ethyl acetate (2×50 mL) and the combined organic phases were dried over MgSO<sub>4</sub>. The solvent was removed by rotary evaporation and the crude product was purified by column chromatography.

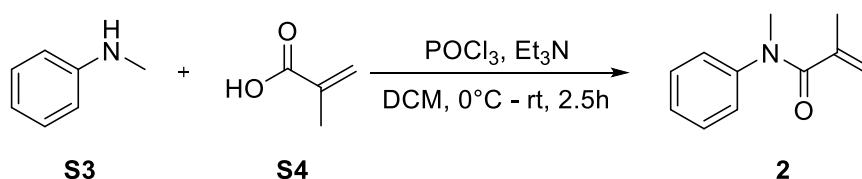

The substrates **2** were synthesized according to the known literature procedures<sup>2</sup>. Into a 250 mL round-bottom flask equipped with a magnetic stir-bar was added solution of aniline **S3** (1.0 g, 1 equiv) and triethylamine (2 equiv) in DCM (60 mL). The mixture was stirred at 0 °C. Then methacrylic acid **S4** (1.2 equiv) was added. Phosphorus oxychloride (2 equiv) was added dropwise. The resulting solution was allowed to warm up to room temperature and stirred for 2 hours, followed by the addition of H<sub>2</sub>O (50 mL) to quench excess acid. The aqueous layer was further extracted by ethyl acetate (2×50 mL) and the combined organic phases were dried over MgSO<sub>4</sub>. The solvent was removed by rotary evaporation and the crude product was purified by column chromatography.

## Experimental procedures

**General procedure for the cascade radical bicyclization reaction between *N*-phenyl-4-pentenamide and *N*-methyl-*N*-phenylmethacrylamide.** To a 4 mL round-bottomed flask was charged with *N*-phenyl-4-pentenamide (**1**, 0.2 mmol), *N*-methyl-*N*-phenylmethacrylamide (**2**, 0.6 mmol), Ag<sub>2</sub>O (0.04 mmol), K<sub>2</sub>S<sub>2</sub>O<sub>8</sub> (0.3 mmol), acetone (0.5 mL) and H<sub>2</sub>O (1.5 mL). The resulting mixture was stirred at 100 °C for 0.5 h. After the reaction was complete, the mixture was added into H<sub>2</sub>O (25 mL) and extracted with ethyl acetate (10 mL) three times. The combined organic layer was dried over anhydrous MgSO<sub>4</sub> and filtered. After removal of the solvent *in vacuo*, the residue was purified by column chromatography (ethyl acetate/hexane 1:1) to afford the pure product **3**.

## Large scale experiments

A mixture of *N*-phenyl-4-pentenamide (**1**, 6 mmol), *N*-methyl-*N*-phenylmethacrylamide (**2**, 18 mmol), Ag<sub>2</sub>O (1.2 mmol), K<sub>2</sub>S<sub>2</sub>O<sub>8</sub> (9 mmol), acetone (10 mL) and H<sub>2</sub>O (30 mL). The resulting mixture was stirred at 100 °C for 0.5 h. After reaction, the mixture was added into H<sub>2</sub>O (50 mL) and extracted with ethyl acetate (50 mL) for three times. The combined organic layer was dried over anhydrous MgSO<sub>4</sub> and filtered. After removal of the solvent *in vacuo*, column chromatography (ethyl acetate/petroleum ether = 1:1) of the residue afforded the pure product. The isolated yield is 74%.

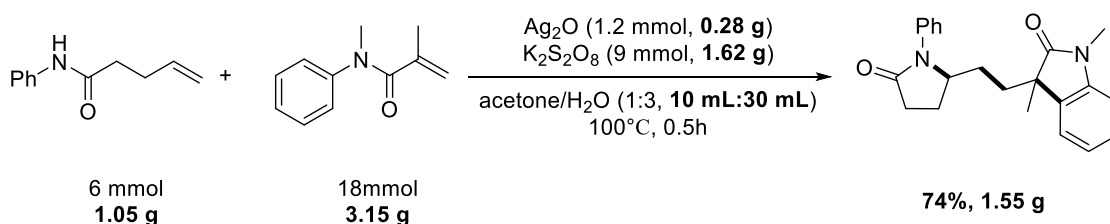

## Characterization Data

### 1,3-dimethyl-3-(2-(5-oxo-1-phenylpyrrolidin-2-yl)ethyl)indolin-2-one (**3aa**)

Colorless oil, 60.6 mg, 87% yield; <sup>1</sup>H NMR (400 MHz, CDCl<sub>3</sub>): 7.26–7.04 (m, 6H), 7.01–6.95 (m, 1H), 6.85–6.66 (m, 2H), 4.05–4.02 (m, 1H), 3.06 (s, 3H), 2.47–2.37 (m, 2H), 2.19–2.13 (m, 1H), 1.83–1.78 (m, 1H), 1.73–1.68 (m, 1H), 1.63–1.54 (m, 1H), 1.21 (d, *J* = 1.84 Hz, 3H), 1.20–1.12 (m, 1H), 1.10–0.88 (m, 1H). <sup>13</sup>C NMR (100 MHz, CDCl<sub>3</sub>): δ 179.2, 179.0, 173.4, 173.2, 142.1, 142.0, 136.4, 136.1, 132.4, 132.0, 127.89, 127.86, 127.0, 126.7, 124.65, 124.59, 122.5, 121.7, 121.6, 121.25, 121.16, 107.2, 107.0, 58.5, 57.5, 46.82, 46.77, 32.3, 30.8, 30.3, 30.1, 27.3, 26.3, 25.1, 23.2, 22.7, 22.5, 22.1. HRMS-ESI(*m/z*): calcd for C<sub>22</sub>H<sub>25</sub>N<sub>2</sub>O<sub>2</sub> (M+H)<sup>+</sup>: 349.1911, found 349.1914.

**1,3-dimethyl-3-(2-(5-oxo-1-(*p*-tolyl)pyrrolidin-2-yl)ethyl)indolin-2-one (3ba)**

Colorless oil, 43.0 mg, 60% yield; <sup>1</sup>H NMR (400 MHz, CDCl<sub>3</sub>): δ 7.26–7.18 (m, 1H), 7.13–7.01 (m, 5H), 6.92–6.74 (m, 2H), 4.07–3.88 (m, 1H), 3.14 (d, *J* = 2.48 Hz, 3H), 2.50–2.39 (m, 2H), 2.32 (d, *J* = 10.92 Hz, 3H), 2.27–2.18 (m, 1H), 1.93–1.83 (m, 1H), 1.81–1.71 (m, 1H), 1.71–1.61 (m, 1H), 1.29 (d, *J* = 2.40 Hz, 3H), 1.27–1.23 (m, 1H), 1.21–0.96 (m, 1H). <sup>13</sup>C NMR (100 MHz, CDCl<sub>3</sub>): δ 179.2, 179.1, 173.3, 173.1, 142.1, 142.0, 134.4, 134.3, 133.8, 133.5, 132.4, 132.0, 128.5, 126.9, 126.7, 122.7, 122.6, 121.6, 121.3, 121.2, 107.1, 106.9, 58.6, 57.6, 46.79, 46.76, 32.3, 30.9, 30.2, 30.0, 27.4, 26.3, 25.10, 25.09, 23.1, 22.8, 22.5, 22.2, 19.97, 19.96. HRMS-ESI(*m/z*): calcd for C<sub>23</sub>H<sub>27</sub>N<sub>2</sub>O<sub>2</sub> (M+H)<sup>+</sup>: 363.2067, found 363.2063.

**3-(2-(1-(4-ethylphenyl)-5-oxopyrrolidin-2-yl)ethyl)-1,3-dimethylindolin-2-one (3ca)**

Yellow oil, 35.4 mg, 50% yield; <sup>1</sup>H NMR (400 MHz, CDCl<sub>3</sub>): δ 7.28–7.14 (m, 2H), 7.13–7.09 (m, 2H), 7.08–7.01 (m, 2H), 6.92–6.75 (m, 2H), 4.08–3.88 (m, 1H), 3.14 (d, *J* = 0.76 Hz, 3H), 2.67–2.56 (m, 2H), 2.56–2.39 (m, 2H), 2.28–2.18 (m, 1H), 1.93–1.84 (m, 1H), 1.83–1.61 (m, 2H), 1.30–1.20 (m, 6H), 1.20–1.13 (m, 1H), 1.03–0.97 (m, 1H). <sup>13</sup>C NMR (100 MHz, CDCl<sub>3</sub>): δ 179.2, 179.1, 173.3, 173.1, 142.1, 142.0, 140.8, 140.7, 133.9, 133.7, 132.4, 132.0, 127.3, 126.9, 126.7, 122.8, 122.7, 121.6, 121.3, 121.2, 107.1, 106.9, 58.7, 57.7, 46.81, 46.78, 32.3, 30.8, 30.2, 30.0, 27.40, 27.37, 27.35, 26.3, 25.1, 23.2, 22.8, 22.4, 22.2, 14.59, 14.57. HRMS-ESI(*m/z*): calcd for C<sub>23</sub>H<sub>27</sub>N<sub>2</sub>O<sub>3</sub> (M+H)<sup>+</sup>: 379.2016, found 379.2019.

**3-(2-(1-(4-fluorophenyl)-5-oxopyrrolidin-2-yl)ethyl)-1,3-dimethylindolin-2-one (3da)**

Yellow oil, 53.2 mg, 73% yield; <sup>1</sup>H NMR (400 MHz, CDCl<sub>3</sub>): δ 7.28–7.16 (m, 2H), 7.16–7.05 (m, 2H), 7.04–6.96 (m, 2H), 6.96–6.76 (m, 2H), 4.07–3.88 (m, 1H), 3.14 (d, *J* = 0.72 Hz, 3H), 2.57–2.42 (m, 2H), 2.26–2.19 (m, 1H), 1.92–1.85 (m, 1H), 1.82–1.73 (m, 1H), 1.69–1.59 (m, 1H), 1.30 (s, 3H), 1.26–1.20 (m, 1H), 1.16–0.96 (m, 1H). <sup>13</sup>C NMR (100 MHz, CDCl<sub>3</sub>): δ 179.1, 179.0, 173.3, 173.2, 159.2 (d, *J* = 243.84 Hz, 3H), 159.2 (d, *J* = 243.78 Hz, 3H), 142.1, 142.0, 132.35 (d, *J* = 2.98 Hz, 3H), 132.32, 132.1 (d, *J* = 2.93 Hz, 3H), 131.9, 127.0, 126.8, 124.5 (d, *J* = 8.21 Hz, 3H), 124.4 (d, *J* = 8.21 Hz, 3H), 121.64, 121.59, 121.2, 121.1, 114.7 (d, *J* = 22.37 Hz, 3H), 107.2, 107.0, 58.7, 46.8, 46.7, 32.1, 30.8, 30.1, 29.9, 27.2, 26.2, 25.1, 23.1, 22.5, 22.1. <sup>19</sup>F NMR (376 MHz, CDCl<sub>3</sub>): δ -116.05~ -116.12 (m), -116.25~ -116.32 (m). HRMS-ESI(*m/z*): calcd for C<sub>22</sub>H<sub>24</sub>FN<sub>2</sub>O<sub>2</sub> (M+H)<sup>+</sup>: 367.1816, found 367.1820.

**3-(2-(1-(4-chlorophenyl)-5-oxopyrrolidin-2-yl)ethyl)-1,3-dimethylindolin-2-one (3ea)**

Yellow oil, 56.9 mg, 75% yield; <sup>1</sup>H NMR (400 MHz, CDCl<sub>3</sub>): δ 7.31–7.23 (m, 2H), 7.23–7.15 (m, 2H), 7.14–7.02 (m, 2H), 6.96–6.72 (m, 2H), 4.09–3.91 (m, 1H), 3.15 (s, 3H), 2.58–2.39 (m, 2H), 2.32–2.18 (m, 1H), 1.95–1.86 (m, 1H), 1.83–1.74 (m, 1H), 1.71–1.57 (m, 1H), 1.30 (d, *J* = 4.64 Hz, 3H), 1.28–1.17 (m, 1H), 1.17–0.97 (m, 1H). <sup>13</sup>C NMR (100 MHz, CDCl<sub>3</sub>): δ 179.1, 178.9, 173.3, 173.1, 142.1, 142.0, 135.0, 134.7, 132.2, 131.8, 129.64, 129.61, 127.93, 127.90, 127.1, 126.8, 123.39, 123.35, 121.7, 121.6, 121.2, 121.1, 107.2, 107.0, 58.3, 57.2, 46.8, 46.7, 32.2, 30.7, 30.2, 30.0, 26.9, 25.9, 25.1, 23.2, 22.5, 21.9. HRMS-ESI(*m/z*): calcd for C<sub>22</sub>H<sub>24</sub>ClN<sub>2</sub>O<sub>2</sub> (M+H)<sup>+</sup>: 383.1521, found 383.1524.

**3-(2-(1-(4-bromophenyl)-5-oxopyrrolidin-2-yl)ethyl)-1,3-dimethylindolin-2-one (3fa)**

Yellow oil, 58.2 mg, 68% yield; <sup>1</sup>H NMR (400 MHz, CDCl<sub>3</sub>): δ 7.43–7.35 (m, 2H), 7.25–7.21 (m, 1H), 7.14–7.03 (m, 3H), 6.97–6.70 (m, 2H), 4.10–3.92 (m, 1H), 3.15 (d, *J* = 0.92 Hz, 3H), 2.53–2.40 (m, 2H), 2.26–2.19 (m, 1H), 2.00–1.86 (m, 1H), 1.80–1.74 (m, 1H), 1.68–1.56 (m, 1H), 1.30 (d, *J* = 5.88 Hz, 3H), 1.28–1.22 (m, 1H), 1.17–

0.97 (m, 1H). <sup>13</sup>C NMR (100 MHz, CDCl<sub>3</sub>): δ 179.1, 178.9, 173.2, 173.1, 142.1, 142.0, 135.5, 135.2, 132.2, 131.8, 130.89, 130.86, 127.1, 126.8, 123.7, 123.6, 121.8, 121.6, 121.2, 121.1, 117.5, 117.4, 107.2, 107.0, 58.3, 57.1, 46.8, 46.7, 32.2, 30.7, 30.2, 30.0, 26.9, 25.9, 25.1, 23.2, 22.52, 22.50, 21.9. HRMS-ESI(m/z): calcd for C<sub>22</sub>H<sub>24</sub>BrN<sub>2</sub>O<sub>2</sub> (M+H)<sup>+</sup>: 427.1016, found 427.1020.

### **3-(2-(1-(3-fluorophenyl)-5-oxopyrrolidin-2-yl)ethyl)-1,3-dimethylindolin-2-one (3ga)**

Yellow oil, 50.4 mg, 70% yield; <sup>1</sup>H NMR (400 MHz, CDCl<sub>3</sub>): δ 7.28–6.78 (m, 8H), 4.11–3.87 (m, 1H), 3.15 (s, 3H), 2.57–2.44 (m, 2H), 2.27–2.18 (m, 1H), 1.95–1.62 (m, 4H), 1.31 (d, *J* = 3.80 Hz, 3H), 1.20–0.97 (m, 1H). <sup>13</sup>C NMR (100 MHz, CDCl<sub>3</sub>): δ 179.1, 178.9, 173.3, 173.1, 161.8 (d, *J* = 244.04 Hz), 161.7 (d, *J* = 243.85 Hz), 142.1, 142.0, 138.0 (d, *J* = 10.10 Hz), 137.8 (d, *J* = 10.12 Hz), 132.3, 131.9, 129.0 (d, *J* = 5.23 Hz), 128.9 (d, *J* = 5.25 Hz), 127.1, 126.9, 121.68, 121.66, 121.2, 121.1, 117.2 (d, *J* = 2.71 Hz), 117.0 (d, *J* = 3.01 Hz), 111.2 (d, *J* = 21.00 Hz), 111.1 (d, *J* = 20.97 Hz), 109.5 (d, *J* = 24.56 Hz), 109.1 (d, *J* = 24.61 Hz), 107.2, 107.1, 58.3, 57.4, 46.85, 46.76, 32.4, 30.9, 30.3, 30.1, 27.0, 26.1, 25.1, 23.2, 22.6, 22.4, 21.9. <sup>19</sup>F NMR (376 MHz, CDCl<sub>3</sub>): δ -111.4~ -111.5(m). HRMS-ESI(m/z): calcd for C<sub>22</sub>H<sub>24</sub>FN<sub>2</sub>O<sub>2</sub> (M+H)<sup>+</sup>: 367.1816, found 367.1821.

### **3-(2-(1-(3-chlorophenyl)-5-oxopyrrolidin-2-yl)ethyl)-1,3-dimethylindolin-2-one (3ha)**

Colorless oil, 52.3 mg, 68% yield; <sup>1</sup>H NMR (400 MHz, CDCl<sub>3</sub>): δ 7.35–7.03 (m, 6H), 6.95–6.75 (m, 2H), 4.11–3.89 (m, 1H), 3.16 (s, 3H), 2.56–2.44 (m, 2H), 2.26–2.19 (m, 1H), 1.96–1.59 (m, 4H), 1.31 (d, *J* = 3.92 Hz, 3H), 1.15–0.98 (m, 1H). <sup>13</sup>C NMR (100 MHz, CDCl<sub>3</sub>): δ 179.1, 178.9, 173.3, 173.1, 142.1, 142.0, 137.7, 137.5, 133.5, 133.4, 132.2, 131.9, 128.82, 128.79, 127.1, 126.9, 124.6, 124.5, 122.5, 122.1, 121.71, 121.69, 121.2, 121.0, 120.2, 120.1, 107.2, 107.0, 58.3, 57.4, 46.8, 46.7, 32.4, 30.8, 30.2, 30.0, 28.7, 27.1, 26.1, 25.13, 25.12, 23.1, 22.63, 22.57, 21.9, 13.1. HRMS-ESI(m/z): calcd for C<sub>22</sub>H<sub>24</sub>ClN<sub>2</sub>O<sub>2</sub> (M+H)<sup>+</sup>: 383.1521, found 383.1524.

### **1,3-dimethyl-3-(2-(5-oxo-1-(*o*-tolyl)pyrrolidin-2-yl)ethyl)indolin-2-one (3ia)**

Yellow oil, 54.6 mg, 75% yield; <sup>1</sup>H NMR (400 MHz, CDCl<sub>3</sub>): δ 7.27–7.09 (m, 4H), 7.03–6.94 (m, 2H), 6.87–6.76 (m, 2H), 3.82–3.66 (m, 1H), 3.10 (d, *J* = 6.40 Hz, 1H), 2.49–2.39 (m, 2H), 2.35–2.24 (m, 1H), 2.09 (d, *J* = 25.72 Hz, 3H), 1.79–1.48 (m, 3H), 1.27 (d, *J* = 19.92 Hz, 3H), 1.17–1.09 (m, 1H), 1.01–0.93 (m, 1H). <sup>13</sup>C NMR (100 MHz, CDCl<sub>3</sub>): δ 179.08, 179.06, 173.3, 173.2, 142.05, 142.02, 135.1, 134.8, 132.3, 132.2, 130.13, 130.07, 128.2, 128.0, 126.94, 126.90, 126.8, 125.6, 125.5, 121.6, 121.5, 121.3, 121.2, 59.7, 59.2, 46.9, 46.7, 32.8, 31.9, 29.5, 28.5, 27.3, 25.01, 24.99, 24.4, 23.8, 22.5, 22.4, 17.0, 16.9. HRMS-ESI(m/z): calcd for C<sub>23</sub>H<sub>27</sub>F<sub>6</sub>N<sub>2</sub>O<sub>2</sub> (M+H)<sup>+</sup>: 363.2067, found 363.2064.

### **3-(2-(1-(2-fluorophenyl)-5-oxopyrrolidin-2-yl)ethyl)-1,3-dimethylindolin-2-one (3ja)**

Yellow oil, 45.6 mg, 62% yield; <sup>1</sup>H NMR (400 MHz, CDCl<sub>3</sub>): δ 7.27–6.76 (m, 8H), 4.04–3.86 (m, 1H), 3.13 (d, *J* = 0.84 Hz, 3H), 2.54–2.45 (m, 2H), 2.33–2.25 (m, 1H), 1.91–1.56 (m, 4H), 1.28 (d, *J* = 12.96 Hz, 3H), 1.21–1.11 (m, 1H). <sup>13</sup>C NMR (100 MHz, CDCl<sub>3</sub>): δ 179.1, 179.0, 173.71, 173.68, 156.7 (d, *J* = 248.84 Hz), 156.6 (d, *J* = 248.85 Hz), 142.05, 142.03, 132.3, 132.1, 128.4 (d, *J* = 1.66 Hz), 128.0 (d, *J* = 1.80 Hz), 127.8 (d, *J* = 7.95 Hz), 127.7 (d, *J* = 7.96 Hz), 126.9, 126.8, 123.8 (d, *J* = 12.21 Hz), 123.6 (d, *J* = 12.04 Hz), 123.44 (d, *J* = 2.18 Hz), 123.41 (d, *J* = 2.20 Hz), 121.6, 121.5, 121.3, 121.1, 115.6 (d, *J* = 19.98 Hz), 115.5 (d, *J* = 19.96 Hz), 107.03, 106.97, 58.9 (d, *J* = 2.83 Hz), 58.3 (d, *J* = 3.00 Hz), 46.74, 46.70, 32.2, 31.0, 29.6, 29.4, 28.0, 26.8, 25.1, 25.0, 23.8, 23.1, 22.9, 22.4. <sup>19</sup>F NMR (376 MHz, CDCl<sub>3</sub>): δ -119.45~ -119.51 (m), -119.9~ -120.0 (m). HRMS-ESI(m/z): calcd for C<sub>22</sub>H<sub>24</sub>FN<sub>2</sub>O<sub>2</sub> (M+H)<sup>+</sup>: 367.1816, found 367.1811.

**3-(2-(1-(2-bromophenyl)-5-oxopyrrolidin-2-yl)ethyl)-1,3-dimethylindolin-2-one (3ka)**

Yellow oil, 58.3 mg, 68% yield; <sup>1</sup>H NMR (400 MHz, CDCl<sub>3</sub>): δ 7.62–7.58 (m, 1H), 7.28–7.14 (m, 3H), 7.03–6.98 (m, 3H), 6.81–6.77 (m, 1H), 3.96–3.84 (m, 1H), 3.14 (d, *J* = 6.08 Hz, 3H), 2.52–2.46 (m, 2H), 2.36–2.27 (m, 1H), 1.88–1.52 (m, 3H), 1.29 (d, *J* = 18.48 Hz, 3H), 1.21–1.11 (m, 1H), 1.01–0.97 (m, 1H). <sup>13</sup>C NMR (100 MHz, CDCl<sub>3</sub>): δ 179.1, 173.6, 142.1, 142.0, 135.5, 135.3, 132.7, 132.5, 132.22, 132.19, 128.5, 127.2, 127.1, 126.9, 121.6, 121.5, 121.4, 121.3, 107.0, 59.1, 58.6, 46.8, 46.7, 32.5, 31.9, 29.41, 29.38, 28.1, 27.3, 25.1, 24.1, 23.6, 22.5, 22.4. HRMS-ESI(*m/z*): calcd for C<sub>22</sub>H<sub>24</sub>BrN<sub>2</sub>O<sub>2</sub> (M+H)<sup>+</sup>: 427.1016, found 427.1012.

**3-(2-(1-(5-chloro-2-methylphenyl)-5-oxopyrrolidin-2-yl)ethyl)-1,3-dimethylindolin-2-one (3la)**

Yellow oil, 59.0 mg, 75% yield; <sup>1</sup>H NMR (400 MHz, CDCl<sub>3</sub>): δ 7.27–6.80 (m, 7H), 3.80–3.56 (m, 1H), 3.14 (s, 3H), 2.51–2.42 (m, 2H), 2.36–2.23 (m, 1H), 2.06 (d, *J* = 25.12 Hz, 3H), 1.80–1.68 (m, 3H), 1.29 (d, *J* = 15.76 Hz, 3H), 1.18–0.93 (m, 2H). <sup>13</sup>C NMR (100 MHz, CDCl<sub>3</sub>): δ 179.1, 179.0, 173.3, 173.1, 142.05, 142.03, 136.2, 136.0, 133.9, 133.7, 132.2, 132.0, 131.2, 131.1, 130.55, 130.52, 128.3, 128.0, 127.2, 127.1, 127.0, 126.9, 121.7, 121.6, 121.23, 121.16, 107.1, 107.0, 59.7, 59.1, 46.9, 46.7, 32.7, 31.7, 29.5, 29.4, 28.7, 28.5, 27.4, 25.0, 24.3, 23.8, 22.6, 22.5, 16.62, 16.58. HRMS-ESI(*m/z*): calcd for C<sub>23</sub>H<sub>26</sub>ClN<sub>2</sub>O<sub>2</sub> (M+H)<sup>+</sup>: 397.1677, found 397.1683.

**3-(2-(1-(2-fluoro-4-methylphenyl)-5-oxopyrrolidin-2-yl)ethyl)-1,3-dimethylindolin-2-one (3ma)**

Yellow oil, 58.3 mg, 76% yield; <sup>1</sup>H NMR (400 MHz, CDCl<sub>3</sub>): δ 7.25–7.18 (m, 1H), 7.03–6.77 (m, 7H), 3.99–3.82 (m, 1H), 3.14 (d, *J* = 2.72 Hz, 3H), 2.51–2.43 (m, 2H), 2.33 (d, *J* = 5.16 Hz, 3H), 2.30–2.22 (m, 1H), 1.90–1.57 (m, 3H), 1.28 (d, *J* = 11.88 Hz, 3H), 1.23–0.90 (m, 2H). <sup>13</sup>C NMR (100 MHz, CDCl<sub>3</sub>): δ 179.1, 179.0, 173.7, 156.4 (d, *J* = 248.23 Hz), 156.3 (d, *J* = 248.22 Hz), 142.1, 142.0, 138.5 (d, *J* = 7.68 Hz), 138.4 (d, *J* = 7.72 Hz), 132.4, 132.1, 128.0 (d, *J* = 2.21 Hz), 127.6 (d, *J* = 2.25 Hz), 126.9, 126.8, 124.1 (d, *J* = 3.32 Hz), 121.50, 121.49, 121.5, 121.3, 121.2, 120.9 (d, *J* = 12.46 Hz), 120.7 (d, *J* = 12.36 Hz), 116.0 (d, *J* = 19.69 Hz), 115.9 (d, *J* = 19.67 Hz), 107.03, 106.97, 58.9 (d, *J* = 2.54 Hz), 58.3 (d, *J* = 2.71 Hz), 46.71, 46.70, 32.1, 31.0, 29.5, 29.3, 27.9, 26.8, 25.05, 25.03, 23.8, 23.0, 22.9, 22.3, 20.08, 20.06. <sup>19</sup>F NMR (376 MHz, CDCl<sub>3</sub>): δ –120.60~ –120.65 (m), –121.0~ –121.1 (m). HRMS-ESI(*m/z*): calcd for C<sub>23</sub>H<sub>26</sub>N<sub>2</sub>O<sub>2</sub> (M+H)<sup>+</sup>: 381.1973, found 381.1970.

**3-(2-(1-(3-fluoro-4-methylphenyl)-5-oxopyrrolidin-2-yl)ethyl)-1,3-dimethylindolin-2-one (3na)**

Yellow oil, 48.2 mg, 64% yield; <sup>1</sup>H NMR (400 MHz, CDCl<sub>3</sub>): δ 7.26–7.19 (m, 1H), 7.11–6.78 (m, 6H), 4.07–3.86 (m, 1H), 3.16 (d, *J* = 1.40 Hz, 3H), 2.57–2.39 (m, 2H), 2.23 (dd, *J*<sub>1</sub> = 1.52 Hz, *J*<sub>2</sub> = 12.20 Hz, 3H), 1.95–1.60 (m, 3H), 1.31 (d, *J* = 2.20 Hz, 3H), 1.21–0.98 (m, 1H). <sup>13</sup>C NMR (100 MHz, CDCl<sub>3</sub>): δ 179.1, 179.0, 173.2, 173.0, 159.97 (d, *J* = 243.13 Hz), 159.96 (d, *J* = 243.03 Hz), 142.10, 142.05, 135.5 (d, *J* = 9.97 Hz), 135.3 (d, *J* = 9.99 Hz), 132.3, 132.0, 130.24 (d, *J* = 6.18 Hz), 130.23 (d, *J* = 6.24 Hz), 127.0, 126.8, 121.6, 121.5, 121.2, 121.1, 121.0 (d, *J* = 3.43 Hz), 120.8 (d, *J* = 3.42 Hz), 117.4 (d, *J* = 3.36 Hz), 117.3 (d, *J* = 3.34 Hz), 109.6, 109.3, 109.0, 107.1 (d, *J* = 19.10 Hz), 107.2, 107.0, 58.4, 57.5, 46.82, 46.76, 32.3, 30.9, 30.2, 30.0, 27.1, 26.1, 25.1, 23.1, 22.6, 22.5, 21.9, 13.15 (d, *J* = 2.08 Hz), 13.12 (d, *J* = 2.08 Hz). <sup>19</sup>F NMR (376 MHz, CDCl<sub>3</sub>): δ –115.4~ –115.5 (m). HRMS-ESI(*m/z*): calcd for C<sub>23</sub>H<sub>26</sub>FN<sub>2</sub>O<sub>2</sub> (M+H)<sup>+</sup>: 381.1973, found 381.1976.

**3-(2-(1-(3-chloro-4-methylphenyl)-5-oxopyrrolidin-2-yl)ethyl)-1,3-dimethylindolin-2-one (3oa)**

Yellow oil, 42.1 mg, 53% yield; <sup>1</sup>H NMR (400 MHz, CDCl<sub>3</sub>): δ 7.29–6.75 (m, 7H), 4.07–3.85 (m, 1H), 3.16 (d, *J* = 1.04 Hz, 3H), 2.57–2.39 (m, 2H), 2.33 (d, *J* = 12.52 Hz, 3H), 2.28–2.18 (m, 1H), 1.90–1.59 (m, 3H), 1.31 (d, *J* = 1.96 Hz, 3H), 1.29–1.24 (m, 1H), 1.17–0.96 (m, 1H). <sup>13</sup>C NMR (100 MHz, CDCl<sub>3</sub>): δ 179.1, 179.0, 173.2, 173.1, 142.1, 142.0, 135.2, 135.0, 133.4, 133.3, 132.30, 132.28, 131.9, 129.9, 127.0, 126.8, 123.2, 122.8, 121.65, 121.56,

121.2, 121.1, 120.7, 107.2, 107.0, 58.4, 57.5, 46.8, 46.7, 32.3, 30.8, 30.2, 30.0, 27.2, 26.1, 25.13, 25.12, 23.1, 22.7, 22.6, 22.0, 18.6, 18.5. HRMS-ESI(m/z): calcd for C<sub>23</sub>H<sub>26</sub>ClN<sub>2</sub>O<sub>2</sub> (M+H)<sup>+</sup>: 397.1677, found 397.1674.

### **3-(2-(1-(3-bromo-4-methylphenyl)-5-oxopyrrolidin-2-yl)ethyl)-1,3-dimethylindolin-2-one (3pa)**

Yellow oil, 52.4 mg, 60% yield; <sup>1</sup>H NMR (400 MHz, CDCl<sub>3</sub>): δ 7.47–7.38 (m, 1H), 7.24–7.01 (m, 4H), 6.93–6.75 (m, 2H), 4.07–3.85 (m, 1H), 3.16 (d, *J* = 1.08 Hz, 3H), 2.58–2.40 (m, 2H), 2.36 (t, *J* = 12.96 Hz, 3H), 2.25–2.18 (m, 1H), 1.94–1.59 (m, 3H), 1.30 (d, *J* = 2.12 Hz, 3H), 1.29–1.23 (m, 1H), 1.16–0.96 (m, 1H). <sup>13</sup>C NMR (100 MHz, CDCl<sub>3</sub>): δ 179.1, 179.0, 173.3, 173.1, 142.1, 142.0, 135.3, 135.0, 134.2, 134.1, 132.3, 131.9, 129.7, 127.0, 126.8, 126.3, 126.0, 123.7, 123.6, 121.7, 121.6, 121.4, 121.1, 107.2, 107.0, 58.4, 57.5, 46.8, 46.7, 32.3, 30.8, 30.2, 29.9, 27.2, 26.0, 25.14, 25.12, 23.1, 22.7, 22.6, 22.0, 21.40, 21.36. HRMS-ESI(m/z): calcd for C<sub>23</sub>H<sub>26</sub>BrN<sub>2</sub>O<sub>2</sub> (M+H)<sup>+</sup>: 441.1172, found 441.1176.

### **3-(2-(1-(2,4-dimethylphenyl)-5-oxopyrrolidin-2-yl)ethyl)-1,3-dimethylindolin-2-one (3qa)**

Colorless oil, 59.1 mg, 79% yield; <sup>1</sup>H NMR (400 MHz, CDCl<sub>3</sub>): δ 7.26–7.22 (m, 1H), 7.03–6.90 (m, 4H), 6.81–6.71 (m, 2H), 3.77–3.63 (m, 1H), 3.12 (d, *J* = 6.92 Hz, 3H), 2.50–2.36 (m, 2H), 2.30 (d, *J* = 2.84 Hz, 3H), 2.05 (d, *J* = 22.16 Hz, 3H), 1.88–1.15 (m, 4H), 1.28 (d, *J* = 19.08 Hz, 4H), 1.21–0.93 (m, 2H). <sup>13</sup>C NMR (100 MHz, CDCl<sub>3</sub>): δ 179.1, 173.4, 142.1, 142.0, 136.5, 134.5, 132.4, 132.3, 132.1, 130.83, 130.78, 126.91, 126.89, 126.3, 126.2, 121.5, 121.4, 121.3, 107.01, 106.97, 59.7, 59.3, 46.9, 46.7, 32.8, 31.9, 29.5, 29.4, 28.7, 28.4, 27.3, 25.03, 25.00, 24.3, 23.8, 22.5, 22.4, 20.00, 19.98, 16.8. HRMS-ESI(m/z): calcd for C<sub>24</sub>H<sub>29</sub>N<sub>2</sub>O<sub>2</sub> (M+H)<sup>+</sup>: 377.2224, found 377.2220.

### **3-(2-(1-(3,5-dimethylphenyl)-5-oxopyrrolidin-2-yl)ethyl)-1,3-dimethylindolin-2-one (3ra)**

Yellow oil, 43.5 mg, 58% yield; <sup>1</sup>H NMR (400 MHz, CDCl<sub>3</sub>): δ 7.26–7.18 (m, 1H), 7.07–7.00 (m, 1H), 6.93–6.73 (m, 5H), 4.05–3.86 (m, 1H), 3.14 (d, *J* = 3.00 Hz, 3H), 2.57–2.38 (m, 2H), 2.26 (d, *J* = 5.24 Hz, 6H), 2.24–2.16 (m, 1H), 1.93–1.62 (m, 3H), 1.29 (d, *J* = 1.00 Hz, 3H), 1.26–1.23 (m, 1H), 1.15–0.97 (m, 1H). <sup>13</sup>C NMR (100 MHz, CDCl<sub>3</sub>): δ 179.2, 179.1, 173.3, 173.2, 142.1, 142.0, 137.5, 136.2, 136.0, 132.4, 132.1, 128.0, 127.2, 126.9, 126.70, 126.68, 121.53, 121.51, 121.2, 121.1, 120.9, 120.8, 107.1, 106.9, 59.0, 58.0, 46.8, 32.5, 30.9, 30.3, 30.1, 27.4, 26.3, 25.1, 25.0, 23.0, 22.9, 22.5, 22.3, 20.3. HRMS-ESI(m/z): calcd for C<sub>24</sub>H<sub>29</sub>N<sub>2</sub>O<sub>2</sub> (M+H)<sup>+</sup>: 377.2224, found 377.2221.

### **3-(2-(1-mesityl-5-oxopyrrolidin-2-yl)ethyl)-1,3-dimethylindolin-2-one (3sa)**

Colorless oil, 59.3 mg, 76% yield; <sup>1</sup>H NMR (400 MHz, CDCl<sub>3</sub>): δ 7.27–7.21 (m, 1H), 7.05–6.76 (m, 5H), 3.70–3.59 (m, 1H), 3.10 (d, *J* = 20.84 Hz, 3H), 2.49–2.24 (m, 2H), 2.26 (d, *J* = 9.96 Hz, 3H), 2.03 (d, *J* = 15.44 Hz, 3H), 1.92 (d, *J* = 10.84 Hz, 3H), 1.78–1.63 (m, 3H), 1.46–1.37 (m, 1H), 1.26 (d, *J* = 28.72 Hz, 3H), 1.34–0.95 (m, 2H). <sup>13</sup>C NMR (100 MHz, CDCl<sub>3</sub>): δ 179.14, 179.05, 173.3, 173.2, 142.1, 142.0, 136.6, 136.5, 135.8, 135.7, 134.0, 132.4, 132.2, 131.2, 130.9, 128.5, 128.4, 128.3, 128.2, 127.0, 126.9, 121.6, 121.3, 121.2, 106.9, 59.4, 59.3, 46.9, 46.7, 33.5, 33.1, 29.3, 29.2, 28.5, 27.6, 25.3, 25.0, 24.9, 24.8, 22.4, 22.0, 19.94, 19.90, 17.4, 17.3, 17.1, 17.0. HRMS-ESI(m/z): calcd for C<sub>25</sub>H<sub>31</sub>N<sub>2</sub>O<sub>2</sub> (M+H)<sup>+</sup>: 391.2380, found 391.2385.

### **1,3-dimethyl-3-(2-(4-methyl-5-oxo-1-phenylpyrrolidin-2-yl)ethyl)indolin-2-one (3ta)**

After purification, two pairs of mixture (**1**, **2**) were obtained, each of mixture contains two diastereoisomers. Diastereoisomer mixture **1** is a yellow oil, 35.9 mg; diastereoisomer mixtures **2** is a yellow oil, 20.2 mg. 77% yield in total.. <sup>1</sup>H NMR (400 MHz, CDCl<sub>3</sub>): δ 7.33–7.18 (m, 5H), 7.13–7.01 (m, 2H), 6.95–6.77 (m, 2H), 4.08–



3.86 (m, 1H), 3.13 (d,  $J = 3.00$  Hz, 3H), 2.64–2.60 (m, 1H), 2.10–2.01 (m, 1H), 1.94–1.78 (m, 2H), 1.73–1.65 (m, 1H), 1.30 (s, 3H), 1.23–1.19 (m, 3H), 1.18–0.99 (m, 1H);  $^{13}\text{C}$  NMR (100 MHz,  $\text{CDCl}_3$ ):  $\delta$  179.1, 179.0, 175.6, 175.4, 142.1, 142.0, 136.9, 136.6, 132.4, 132.0, 127.9, 127.8, 127.0, 126.8, 124.13, 124.06, 121.6, 121.4, 121.23, 121.19, 107.2, 107.0, 56.4, 55.6, 46.9, 46.8, 35.5, 35.2, 33.0, 31.6, 31.4, 30.8, 28.7, 26.7, 26.0, 25.1, 23.1, 22.7, 15.5, 15.2. HRMS-ESI( $m/z$ ): calcd for  $\text{C}_{23}\text{H}_{27}\text{N}_2\text{O}_2$  ( $\text{M}+\text{H}$ ) $^+$ : 363.4805, found 363.4808. Diastereoisomer mixture 2 :  $^1\text{H}$  NMR (400 MHz,  $\text{CDCl}_3$ ):  $\delta$  7.32–7.02 (m, 7H), 6.90–6.60 (m, 2H), 4.02–3.78 (m, 1H), 3.13 (d,  $J = 3.36$  Hz, 3H), 2.56–2.42 (m, 2H), 1.90–1.82 (m, 1H), 1.65–1.59 (m, 1H), 1.39–1.28 (m, 3H), 1.27 (s, 3H), 1.11–0.79 (m, 2H);  $^{13}\text{C}$  NMR (100 MHz,  $\text{CDCl}_3$ ):  $\delta$  179.2, 179.1, 175.75, 175.71, 142.1, 142.0, 136.4, 136.2, 132.5, 132.0, 127.73, 127.68, 127.0, 126.6, 124.7, 124.5, 123.2, 122.9, 121.7, 121.5, 121.3, 121.2, 107.1, 106.9, 56.0, 54.9, 46.8, 46.7, 35.92, 35.90, 32.8, 32.1, 31.8, 30.5, 28.7, 27.9, 26.2, 25.1, 23.2, 22.4, 15.6, 15.4. HRMS-ESI( $m/z$ ): calcd for  $\text{C}_{23}\text{H}_{27}\text{N}_2\text{O}_2$  ( $\text{M}+\text{H}$ ) $^+$ : 363.4805, found 363.4810.

#### **4-(2-(1,3-dimethyl-2-oxoindolin-3-yl)ethyl)-3-phenyloxazolidin-2-one (3ua)**

Colorless oil, 59.6 mg, 85% yield;  $^1\text{H}$  NMR (400 MHz,  $\text{CDCl}_3$ ):  $\delta$  7.26–7.12 (m, 5H), 7.09–6.98 (m, 2H), 6.87–6.70 (m, 2H), 4.40–4.31 (m, 1H), 4.24–4.07 (m, 1H), 4.02–3.91 (m, 1H), 3.08 (s, 3H), 1.91–1.76 (m, 1H), 1.64–1.58 (m, 1H), 1.30–1.25 (m, 1H), 1.23 (d,  $J = 4.52$  Hz, 3H), 1.19–1.04 (m, 1H).  $^{13}\text{C}$  NMR (100 MHz,  $\text{CDCl}_3$ ):  $\delta$  179.0, 178.7, 154.6, 154.5, 142.1, 142.0, 135.5, 135.3, 132.0, 131.6, 128.1, 127.2, 127.0, 124.1, 124.0, 121.9, 121.8, 121.1, 120.4, 120.2, 107.3, 107.1, 65.7, 65.1, 54.8, 54.0, 46.7, 31.4, 30.1, 26.0, 25.2, 25.0, 23.4, 22.6. HRMS-ESI( $m/z$ ): calcd for  $\text{C}_{21}\text{H}_{23}\text{N}_2\text{O}_3$  ( $\text{M}+\text{H}$ ) $^+$ : 351.1703, found 351.1700.

#### **1,3,5-trimethyl-3-(2-(5-oxo-1-phenylpyrrolidin-2-yl)ethyl)indolin-2-one (3ab)**

Yellow oil, 43.5 mg, 60% yield;  $^1\text{H}$  NMR (400 MHz,  $\text{CDCl}_3$ ):  $\delta$  7.34–7.27 (m, 2H), 7.24–7.13 (m, 3H), 7.06–6.99 (m, 1H), 6.88–6.57 (m, 2H), 4.13–3.94 (m, 1H), 3.12 (m, 3H), 2.55–2.43 (m, 2H), 2.28 (d,  $J = 36.96$  Hz, 3H), 1.85–1.76 (m, 2H), 1.69–1.59 (m, 2H), 1.27 (d,  $J = 3.44$  Hz, 3H), 1.21–1.02 (m, 2H).  $^{13}\text{C}$  NMR (100 MHz,  $\text{CDCl}_3$ ):  $\delta$  179.2, 179.0, 173.3, 173.1, 139.71, 139.68, 136.5, 136.2, 132.5, 132.1, 131.14, 131.08, 127.8, 127.2, 127.0, 124.6, 122.6, 122.5, 122.10, 122.07, 106.9, 106.7, 58.6, 57.5, 46.9, 46.8, 32.4, 30.7, 30.3, 30.1, 28.7, 27.3, 26.4, 25.1, 23.3, 22.8, 22.5, 22.1, 20.13, 20.11. HRMS-ESI( $m/z$ ): calcd for  $\text{C}_{23}\text{H}_{27}\text{N}_2\text{O}_2$  ( $\text{M}+\text{H}$ ) $^+$ : 363.2067, found 363.2073.

#### **5-fluoro-1,3-dimethyl-3-(2-(5-oxo-1-phenylpyrrolidin-2-yl)ethyl)indolin-2-one (3ac)**

Yellow oil, 58.7 mg, 80% yield;  $^1\text{H}$  NMR (400 MHz,  $\text{CDCl}_3$ ):  $\delta$  7.35–7.28 (m, 2H), 7.24–7.13 (m, 3H), 6.97–6.86 (m, 1H), 6.82–6.41 (m, 2H), 4.16–3.98 (m, 1H), 3.12 (d,  $J = 2.24$  Hz, 3H), 2.59–2.42 (m, 2H), 2.29–2.20 (m, 1H), 1.95–1.74 (m, 2H), 1.67–1.56 (m, 1H), 1.28 (d,  $J = 1.08$  Hz, 1H), 1.19–0.87 (m, 2H).  $^{13}\text{C}$  NMR (100 MHz,  $\text{CDCl}_3$ ):  $\delta$  178.7, 178.6, 173.3, 173.1, 158.30 (d,  $J = 239.53$  Hz), 158.25 (d,  $J = 239.81$  Hz), 138.0 (d,  $J = 1.78$  Hz), 137.9 (d,  $J = 1.85$  Hz), 136.3, 136.0, 134.0 (d,  $J = 18.08$  Hz), 133.7 (d,  $J = 7.73$  Hz), 127.91, 127.88, 124.8, 122.6, 122.5, 113.2 (d,  $J = 18.04$  Hz), 112.9 (d,  $J = 18.08$  Hz), 109.6 (d,  $J = 4.68$  Hz), 109.3 (d,  $J = 4.66$  Hz), 107.6 (d,  $J = 8.08$  Hz), 107.4 (d,  $J = 8.09$  Hz), 58.5, 57.3, 47.29, 47.28, 32.4, 30.6, 30.3, 30.1, 28.7, 27.2, 26.0, 25.3, 25.2, 23.1, 22.8, 22.4, 22.0.  $^{19}\text{F}$  NMR (376 MHz,  $\text{CDCl}_3$ ):  $\delta$  -119.9~ -120.0(m), -120.3~ -120.4(m). HRMS-ESI( $m/z$ ): calcd for  $\text{C}_{22}\text{H}_{24}\text{FN}_2\text{O}_2$  ( $\text{M}+\text{H}$ ) $^+$ : 367.1816, found 367.1819.

#### **5-chloro-1,3-dimethyl-3-(2-(5-oxo-1-phenylpyrrolidin-2-yl)ethyl)indolin-2-one (3ad)**

Yellow oil, 62.8 mg, 82% yield; <sup>1</sup>H NMR (400 MHz, CDCl<sub>3</sub>): δ 7.53–7.43 (m, 1H), 7.32–7.28 (m, 2H), 7.23–7.13 (m, 3H), 7.06–6.72 (m, 2H), 4.16–4.13 (m, 1H), 3.92 (d, *J* = 4.12 Hz, 3H), 2.54–2.41 (m, 2H), 2.29–2.20 (m, 1H), 1.98–1.61 (m, 4H), 1.28 (d, *J* = 3.16 Hz, 3H), 1.20–1.12 (m, 1H). <sup>13</sup>C NMR (100 MHz, CDCl<sub>3</sub>): δ 178.6, 178.4, 173.2, 173.1, 141.0, 140.6, 136.3, 135.9, 134.1, 133.7, 127.9, 127.0, 126.95, 126.91, 125.0, 124.8, 122.6, 122.5, 121.8, 121.7, 108.1, 107.9, 58.5, 57.4, 47.1, 32.3, 30.3, 30.1, 28.7, 27.2, 26.2, 25.23, 25.21, 23.1, 22.8, 22.4, 22.0. HRMS-ESI(*m/z*): calcd for C<sub>24</sub>H<sub>27</sub>N<sub>2</sub>O<sub>4</sub> (M+H)<sup>+</sup>: 407.1965, found 407.1968.

#### **5-bromo-1,3-dimethyl-3-(2-(5-oxo-1-phenylpyrrolidin-2-yl)ethyl)indolin-2-one (3ae)**

Yellow oil, 62.4 mg, 73% yield; <sup>1</sup>H NMR (400 MHz, CDCl<sub>3</sub>): δ 7.36–7.30 (m, 3H), 7.24–6.86 (m, 4H), 6.68–6.64 (m, 1H), 4.14–3.97 (m, 1H), 3.11 (d, *J* = 1.52 Hz, 3H), 2.55–2.47 (m, 2H), 2.29–2.22 (m, 1H), 1.93–1.87 (m, 1H), 1.85–1.75 (m, 1H), 1.67–1.58 (m, 1H), 1.27 (s, 3H), 1.27–1.02 (m, 2H). <sup>13</sup>C NMR (100 MHz, CDCl<sub>3</sub>): δ 179.5, 179.3, 174.2, 174.1, 142.2, 142.1, 137.3, 137.0, 135.5, 135.2, 130.84, 130.75, 129.0, 126.1, 125.8, 125.6, 125.5, 123.6, 123.5, 115.4, 115.3, 109.6, 109.5, 59.5, 58.5, 48.1, 33.4, 31.7, 31.3, 31.1, 28.2, 27.3, 26.21, 26.19, 24.1, 23.8, 23.4, 23.1. HRMS-ESI(*m/z*): calcd for C<sub>22</sub>H<sub>24</sub>BrN<sub>2</sub>O<sub>2</sub> (M+H)<sup>+</sup>: 427.1016, found 427.1019.

#### **methyl 1,3-dimethyl-2-oxo-3-(2-(5-oxo-1-phenylpyrrolidin-2-yl)ethyl)indoline-5-carboxylate (3af)**

Yellow oil, 50.1 mg, 62% yield; <sup>1</sup>H NMR (400 MHz, CDCl<sub>3</sub>): δ 8.01–7.94 (m, 1H), 7.76–7.53 (m, 1H), 7.25–7.09 (m, 5H), 6.84–6.80 (m, 1H), 4.13–3.95 (m, 1H), 3.92 (d, *J* = 4.28 Hz, 3H), 3.16 (d, *J* = 3.00 Hz, 3H), 2.60–2.41 (m, 2H), 2.35–2.20 (m, 1H), 1.95–1.86 (m, 1H), 1.83–1.65 (m, 2H), 1.32 (d, *J* = 4.00 Hz, 3H), 1.20–0.97 (m, 1H). <sup>13</sup>C NMR (100 MHz, CDCl<sub>3</sub>): δ 179.4, 179.3, 173.2, 173.1, 165.8, 165.7, 146.2, 146.1, 136.3, 136.0, 132.3, 132.0, 129.7, 129.6, 127.89, 127.86, 124.7, 124.6, 123.6, 123.5, 122.6, 122.5, 122.4, 106.7, 106.6, 58.4, 57.5, 51.1, 51.0, 46.7, 46.6, 32.2, 31.1, 30.3, 30.1, 27.1, 26.3, 25.32, 25.29, 22.8, 22.7, 22.3, 22.1. HRMS-ESI(*m/z*): calcd for C<sub>24</sub>H<sub>27</sub>N<sub>2</sub>O<sub>4</sub> (M+H)<sup>+</sup>: 407.1965, found 407.1968.

#### **1,3-dimethyl-3-(2-(5-oxo-1-phenylpyrrolidin-2-yl)ethyl)-5-(trifluoromethyl)indolin-2-one (3ag)**

Yellow oil, 33.3 mg, 40% yield; <sup>1</sup>H NMR (400 MHz, CDCl<sub>3</sub>): δ 7.54–7.49 (m, 1H), 7.38–7.27 (m, 2H), 7.26–7.04 (m, 4H), 6.87–6.84 (m, 1H), 4.14–3.96 (m, 1H), 3.17 (s, 3H), 2.59–2.42 (m, 2H), 2.31–2.21 (m, 1H), 1.97–1.86 (m, 1H), 1.81–1.62 (m, 2H), 1.32 (d, *J* = 1.48 Hz, 3H), 1.29–1.03 (m, 2H). <sup>13</sup>C NMR (100 MHz, CDCl<sub>3</sub>): δ 179.1, 178.8, 173.2, 173.1, 145.11 (d, *J* = 10.02 Hz), 145.00 (d, *J* = 10.25 Hz), 136.3, 136.0, 133.0, 132.7, 128.0, 127.9, 125.0, 124.9, 124.81, 124.77, 124.2 (d, *J* = 93.10 Hz), 124.1 (d, *J* = 89.19 Hz), 123.0 (d, *J* = 209.29 Hz), 122.9 (d, *J* = 212.99 Hz), 122.6, 122.4, 118.2 (q, *J* = 3.12 Hz), 106.9, 106.8, 58.5, 57.5, 46.84, 46.81, 32.4, 30.8, 30.2, 30.1, 28.7, 27.2, 26.4, 25.32, 25.30, 22.9, 22.8, 22.5, 22.1. <sup>19</sup>F NMR (376 MHz, CDCl<sub>3</sub>): δ -61.2(s), -61.3(s). HRMS-ESI(*m/z*): calcd for C<sub>23</sub>H<sub>24</sub>F<sub>3</sub>N<sub>2</sub>O<sub>2</sub> (M+H)<sup>+</sup>: 417.1784, found 417.1780.

#### **1,3-dimethyl-2-oxo-3-(2-(5-oxo-1-phenylpyrrolidin-2-yl)ethyl)indoline-5-carbonitrile (3ah)**

Yellow oil, 34.9 mg, 47% yield; <sup>1</sup>H NMR (400 MHz, CDCl<sub>3</sub>): δ 7.58–7.50 (m, 1H), 7.40–7.16 (m, 6H), 6.87–6.79 (m, 1H), 4.22–4.02 (m, 1H), 3.16 (d, *J* = 3.00 Hz, 3H), 2.62–2.45 (m, 2H), 2.34–2.20 (m, 1H), 1.97–1.76 (m, 2H), 1.76–1.57 (m, 1H), 1.29 (d, *J* = 6.44 Hz, 3H), 1.22–0.80 (m, 2H). <sup>13</sup>C NMR (100 MHz, CDCl<sub>3</sub>): δ 179.8, 179.7, 174.2, 174.1, 147.0, 146.9, 137.2, 136.8, 134.4, 134.0, 133.4, 133.3, 129.0, 126.4, 126.0, 125.6, 125.4, 123.7, 123.5, 119.1, 119.0, 108.6, 108.3, 105.9, 105.7, 59.3, 57.9, 47.7, 47.6, 33.2, 31.4, 31.1, 28.1, 26.3, 24.1, 23.8, 23.2, 22.8. HRMS-ESI(*m/z*): calcd for C<sub>23</sub>H<sub>24</sub>N<sub>3</sub>O<sub>2</sub> (M+H)<sup>+</sup>: 374.1863, found 374.1868.

#### **1,3,7-trimethyl-3-(2-(5-oxo-1-phenylpyrrolidin-2-yl)ethyl)indolin-2-one (3ai)**

Yellow oil, 29.1 mg, 41% yield; <sup>1</sup>H NMR (400 MHz, CDCl<sub>3</sub>): δ 7.34–7.27 (m, 2H), 7.24–7.12 (m, 3H), 6.99–6.58 (m, 3H), 4.12–3.90 (m, 1H), 3.41 (s, 3H), 2.54 (d, *J* = 3.72 Hz, 3H), 2.52–2.42 (m, 1H), 2.29–2.19 (m, 1H), 1.94–1.71 (m, 3H), 1.67–1.57 (m, 1H), 1.26 (d, *J* = 2.20 Hz, 3H), 1.18–0.88 (m, 2H). <sup>13</sup>C NMR (100 MHz, CDCl<sub>3</sub>): δ 179.9, 179.7, 173.3, 173.1, 139.9, 139.8, 136.5, 136.3, 133.0, 132.7, 130.7, 130.5, 127.88, 127.85, 124.6, 124.5, 122.5, 122.4, 121.6, 121.5, 119.2, 119.1, 118.8, 118.6, 58.6, 57.6, 46.14, 46.06, 32.7, 31.2, 30.3, 30.1, 28.7, 28.4, 27.3, 26.4, 23.7, 22.8, 22.2, 18.01, 17.99. HRMS-ESI(*m/z*): calcd for C<sub>23</sub>H<sub>27</sub>N<sub>2</sub>O<sub>2</sub> (M+H)<sup>+</sup>: 363.2067, found 363.2072.

### **7-chloro-1,3-dimethyl-3-(2-(5-oxo-1-phenylpyrrolidin-2-yl)ethyl)indolin-2-one (3aj)**

Yellow oil, 38.3 mg, 50% yield; <sup>1</sup>H NMR (400 MHz, CDCl<sub>3</sub>): δ 7.35–7.30 (m, 2H), 7.23–6.92 (m, 5H), 6.79–6.53 (m, 1H), 4.16–3.92 (m, 1H), 3.50 (d, *J* = 2.76 Hz, 3H), 2.62–2.42 (m, 2H), 2.29–2.19 (m, 1H), 1.95–1.56 (m, 3H), 1.27 (d, *J* = 1.40 Hz, 3H), 1.16–0.83 (m, 2H). <sup>13</sup>C NMR (100 MHz, CDCl<sub>3</sub>): δ 179.3, 179.2, 138.0, 137.9, 136.4, 136.1, 135.2, 134.8, 129.3, 129.0, 128.0, 127.9, 124.8, 124.6, 122.6, 122.5, 122.4, 122.3, 119.7, 119.6, 114.6, 114.4, 58.4, 57.3, 46.63, 46.57, 32.6, 30.9, 30.2, 30.1, 28.7, 28.4, 27.3, 26.1, 23.6, 22.9, 22.8, 22.0. HRMS-ESI(*m/z*): calcd for C<sub>22</sub>H<sub>24</sub>ClN<sub>2</sub>O<sub>2</sub> (M+H)<sup>+</sup>: 383.1521, found 383.1517.

### **methyl 1,3-dimethyl-2-oxo-3-(2-(5-oxo-1-phenylpyrrolidin-2-yl)ethyl)indoline-7-carboxylate (3ak)**

Yellow oil, 34.4 mg, 42% yield; <sup>1</sup>H NMR (400 MHz, CDCl<sub>3</sub>): δ 7.53–7.43 (m, 1H), 7.32–7.28 (m, 2H), 7.23–7.13 (m, 3H), 7.06–6.72 (m, 2H), 4.16–4.13 (m, 1H), 3.92 (d, *J* = 4.12 Hz, 3H), 2.54–2.41 (m, 2H), 2.29–2.20 (m, 1H), 1.98–1.61 (m, 4H), 1.28 (d, *J* = 3.16 Hz, 3H), 1.20–1.12 (m, 1H). <sup>13</sup>C NMR (100 MHz, CDCl<sub>3</sub>): δ 180.1, 179.9, 173.3, 173.1, 166.22, 166.16, 141.0, 140.9, 136.3, 136.1, 134.3, 133.9, 128.2, 128.0, 127.9, 124.8, 124.6, 123.9, 123.8, 122.7, 122.6, 120.9, 120.8, 114.7, 114.4, 58.4, 57.2, 51.4, 45.6, 45.5, 32.4, 30.6, 30.3, 30.1, 28.8, 28.7, 27.3, 26.0, 23.4, 22.8, 22.7, 22.0. HRMS-ESI(*m/z*): calcd for C<sub>24</sub>H<sub>27</sub>N<sub>2</sub>O<sub>4</sub> (M+H)<sup>+</sup>: 407.1965, found 407.1968.

### **7-bromo-1,3-dimethyl-3-(2-(5-oxo-1-phenylpyrrolidin-2-yl)ethyl)indolin-2-one (3al)**

Yellow oil, 35.1 mg, 41% yield; <sup>1</sup>H NMR (400 MHz, CDCl<sub>3</sub>): δ 7.32–7.22 (m, 4H), 7.21–7.08 (m, 3H), 6.76–6.71 (m, 1H), 4.11–3.97 (m, 1H), 3.11 (d, *J* = 3.88 Hz, 3H), 2.61–2.42 (m, 2H), 2.32–2.23 (m, 2H), 1.95–1.78 (m, 2H), 1.46 (d, *J* = 1.96 Hz, 3H), 1.20–1.11 (m, 1H), 1.02–0.86 (m, 1H). <sup>13</sup>C NMR (100 MHz, CDCl<sub>3</sub>): δ 178.5, 178.3, 173.2, 173.1, 144.3, 144.1, 136.4, 136.3, 129.6, 129.5, 128.53, 128.48, 127.9, 127.8, 125.8, 125.7, 124.5, 124.3, 122.2, 122.0, 117.7, 117.6, 106.2, 106.1, 58.3, 57.8, 49.5, 49.4, 30.21, 30.19, 28.8, 27.2, 25.29, 25.26, 22.8, 22.5, 20.7, 20.5. HRMS-ESI(*m/z*): calcd for C<sub>22</sub>H<sub>24</sub>BrN<sub>2</sub>O<sub>2</sub> (M+H)<sup>+</sup>: 427.1016, found 427.1019.

### **6-bromo-1,3-dimethyl-3-(2-(5-oxo-1-phenylpyrrolidin-2-yl)ethyl)indolin-2-one (3al')**

Yellow oil, 29.1 mg, 34% yield; <sup>1</sup>H NMR (400 MHz, CDCl<sub>3</sub>): δ 7.35–7.29 (m, 3H), 7.18–7.14 (m, 3H), 7.02–6.52 (m, 2H), 4.12–3.87 (m, 1H), 3.11 (d, *J* = 1.20 Hz, 3H), 2.57–2.46 (m, 2H), 2.27–2.22 (m, 1H), 1.87–1.82 (m, 1H), 1.66–1.58 (m, 2H), 1.26 (d, *J* = 0.64 Hz, 3H), 1.16–1.03 (m, 1H), 0.88–0.83 (m, 1H). <sup>13</sup>C NMR (100 MHz, CDCl<sub>3</sub>): δ 178.9, 178.8, 173.2, 173.1, 143.5, 143.4, 136.4, 136.1, 131.3, 130.9, 128.0, 124.8, 124.6, 124.4, 124.3, 122.62, 122.57, 122.5, 122.4, 120.5, 120.2, 110.7, 110.5, 58.5, 57.3, 46.7, 46.6, 32.2, 30.5, 30.3, 30.1, 28.7, 27.2, 26.1, 25.2, 23.1, 22.8, 22.3, 22.0. HRMS-ESI(*m/z*): calcd for C<sub>22</sub>H<sub>24</sub>BrN<sub>2</sub>O<sub>2</sub> (M+H)<sup>+</sup>: 427.1016, found 427.1012.

### **3-methyl-3-(2-(5-oxo-1-phenylpyrrolidin-2-yl)ethyl)-1-phenylindolin-2-one (3am)**

Yellow oil, 51.0 mg, 62% yield; <sup>1</sup>H NMR (400 MHz, CDCl<sub>3</sub>): δ 7.50–7.28 (m, 5H), 7.22–7.04 (m, 7H), 6.98–6.72 (m, 2H), 4.19–3.95 (m, 1H), 2.62–2.42 (m, 2H), 2.32–2.22 (m, 1H), 2.07–1.96 (m, 1H), 1.86–1.70 (m, 2H), 1.42 (d, *J* = 3.60 Hz, 3H), 1.30–1.19 (m, 1H), 1.12–0.86 (m, 1H). <sup>13</sup>C NMR (100 MHz, CDCl<sub>3</sub>): δ 178.6, 178.4, 173.3,

173.1, 142.1, 142.0, 136.4, 136.1, 133.3, 133.2, 132.1, 131.7, 128.6, 128.5, 127.98, 127.95, 127.04, 127.00, 126.9, 126.7, 125.45, 125.40, 124.71, 124.68, 122.8, 122.7, 122.2, 122.1, 121.6, 121.5, 108.5, 108.3, 58.6, 57.7, 46.9, 32.8, 31.8, 30.3, 30.1, 28.7, 27.3, 26.7, 23.3, 22.8, 22.3. HRMS-ESI(m/z): calcd for C<sub>27</sub>H<sub>27</sub>N<sub>2</sub>O<sub>2</sub> (M+H)<sup>+</sup>: 411.2067, found 411.2070.

**1-benzyl-3-methyl-3-(2-(5-oxo-1-phenylpyrrolidin-2-yl)ethyl)indolin-2-one (3an)**

Colorless oil, 44.2 mg, 52% yield; <sup>1</sup>H NMR (400 MHz, CDCl<sub>3</sub>): δ 7.42–7.27 (m, 3H), 7.25–6.97 (m, 9H), 6.91–6.66 (m, 2H), 4.92–4.74 (m, 2H), 4.13–3.96 (m, 1H), 2.61–2.41 (m, 2H), 2.30–2.19 (m, 1H), 2.02–1.91 (m, 1H), 1.82–1.71 (m, 2H), 1.35 (d, *J* = 3.40 Hz, 3H), 1.20–1.13 (m, 2H), 1.05–0.83 (m, 1H). <sup>13</sup>C NMR (100 MHz, CDCl<sub>3</sub>): δ 179.2, 179.1, 173.2, 173.1, 141.3, 141.1, 136.4, 136.2, 134.9, 134.8, 132.3, 132.0, 127.9, 127.74, 127.71, 126.9, 126.7, 126.60, 126.58, 126.20, 126.17, 124.7, 124.6, 122.6, 122.5, 121.7, 121.6, 121.31, 121.25, 108.13, 108.07, 58.7, 57.5, 46.80, 46.78, 42.7, 42.6, 32.5, 31.1, 30.2, 30.1, 28.7, 27.4, 26.7, 23.7, 22.8, 22.3. HRMS-ESI(m/z): calcd for C<sub>28</sub>H<sub>29</sub>N<sub>2</sub>O<sub>2</sub> (M+H)<sup>+</sup>: 425.2224, found 425.2220.

**2-methyl-2-(2-(5-oxo-1-phenylpyrrolidin-2-yl)ethyl)-5,6-dihydro-4H-pyrrolo[3,2,1-*ij*]quinolin-1(2H)-one (3ao)**

Yellow oil, 56.2 mg, 75% yield; <sup>1</sup>H NMR (400 MHz, CDCl<sub>3</sub>): δ 7.34–7.27 (m, 2H), 7.26–7.12 (m, 3H), 7.08–6.89 (m, 2H), 6.83–6.60 (m, 1H), 4.13–3.94 (m, 1H), 3.64–3.57 (m, 2H), 2.76–2.72 (m, 2H), 2.55–2.41 (m, 2H), 2.30–2.19 (m, 1H), 2.08–1.61 (m, 7H), 1.29 (d, *J* = 2.92 Hz, 3H), 1.23–0.86 (m, 3H). <sup>13</sup>C NMR (100 MHz, CDCl<sub>3</sub>): δ 178.1, 177.9, 173.3, 173.2, 137.9, 137.8, 136.4, 136.2, 130.9, 130.6, 127.90, 127.87, 125.8, 125.6, 124.6, 122.63, 122.57, 121.11, 121.05, 119.21, 119.16, 119.1, 119.0, 58.7, 57.8, 48.18, 48.15, 37.70, 37.68, 32.1, 30.9, 30.3, 30.1, 28.7, 27.3, 26.6, 23.54, 23.51, 22.78, 22.76, 22.3, 22.1, 20.2, 20.1. HRMS-ESI(m/z): calcd for C<sub>24</sub>H<sub>27</sub>N<sub>2</sub>O<sub>2</sub> (M+H)<sup>+</sup>: 375.2067, found 375.2064.

**Reference:**

- [1] Li, Z.; Song, L.; Li, C. Silver-Catalyzed Radical Aminofluorination of Unactivated Alkenes in Aqueous Media. *J. Am. Chem. Soc.* **2013**, *135*, 4640–4643.
- [2] Li, Y.-M.; Sun, M.; Wang, H.-L.; Tian, Q.-P.; Yang, S.-D. Direct Annulations toward Phosphorylated Oxindoles: Silver-Catalyzed Carbon-Phosphorus Functionalization of Alkenes. *Angew. Chem., Int. Ed.* **2013**, *52*, 3972–3976.

# Copies of $^1\text{H}$ and $^{13}\text{C}$ NMR spectra

## 1,3-dimethyl-3-(2-(5-oxo-1-phenylpyrrolidin-2-yl)ethyl)indolin-2-one (3aa)

$^1\text{H}$  NMR (400 MHz,  $\text{CDCl}_3$ )

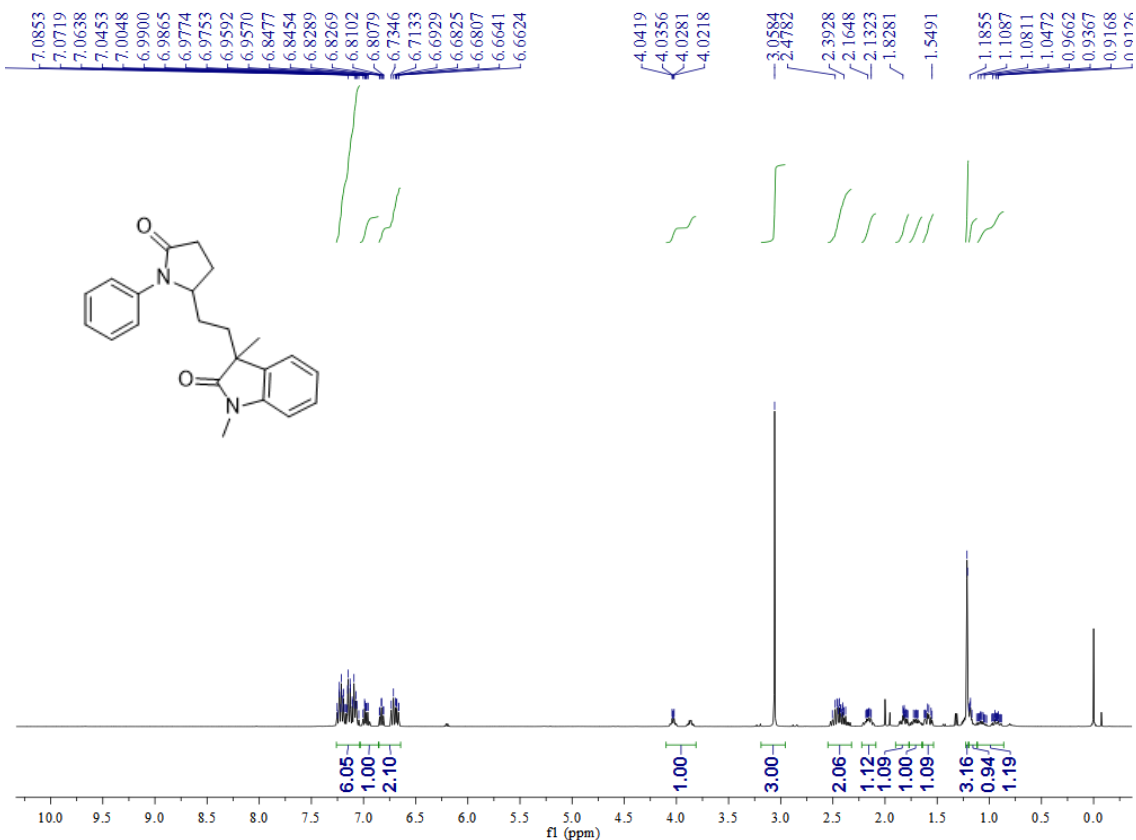

$^{13}\text{C}$  NMR (100 MHz,  $\text{CDCl}_3$ )

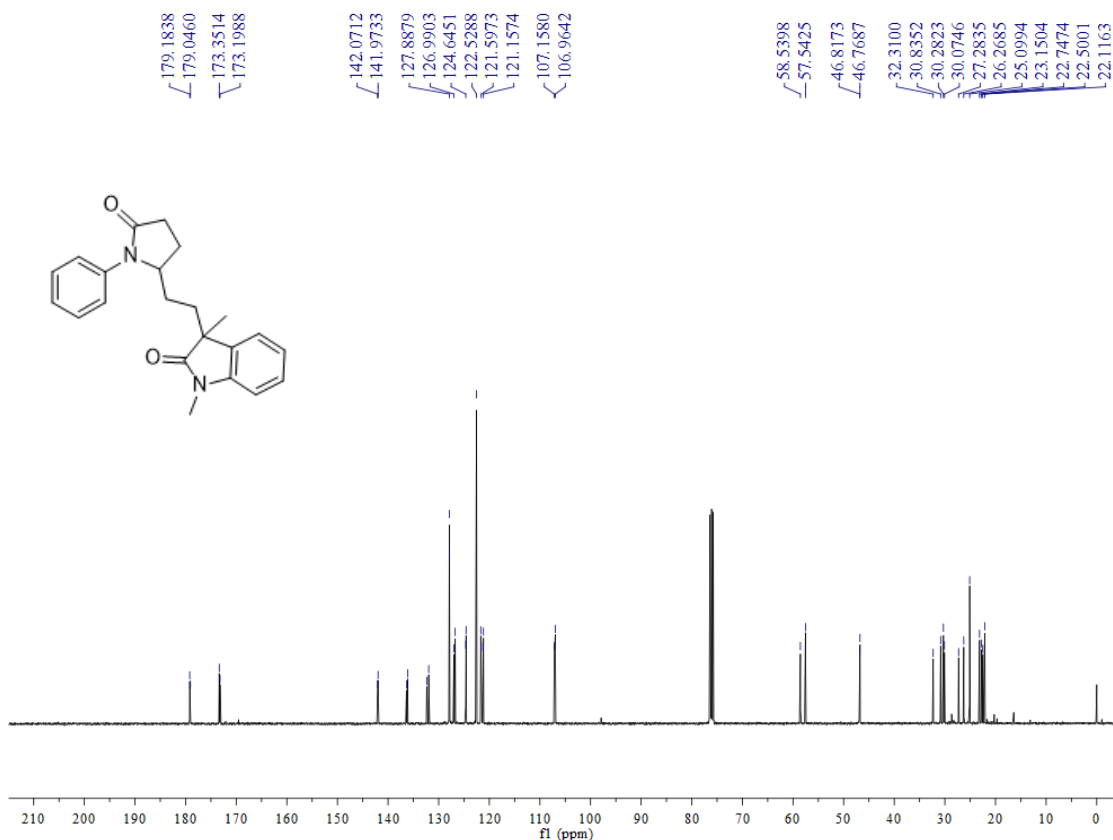

### 1,3-dimethyl-3-(2-(5-oxo-1-(*p*-tolyl)pyrrolidin-2-yl)ethyl)indolin-2-one (3ba)

<sup>1</sup>H NMR (400 MHz, CDCl<sub>3</sub>)

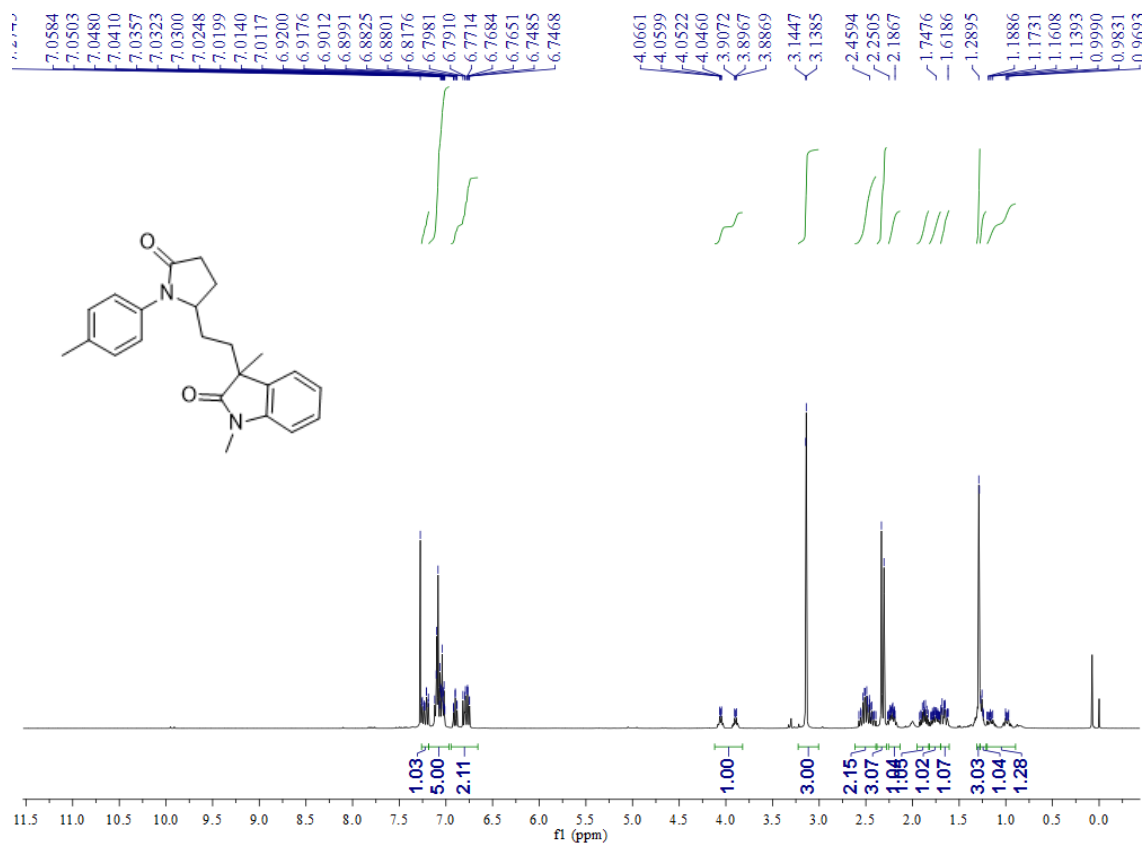

<sup>13</sup>C NMR (100 MHz, CDCl<sub>3</sub>)

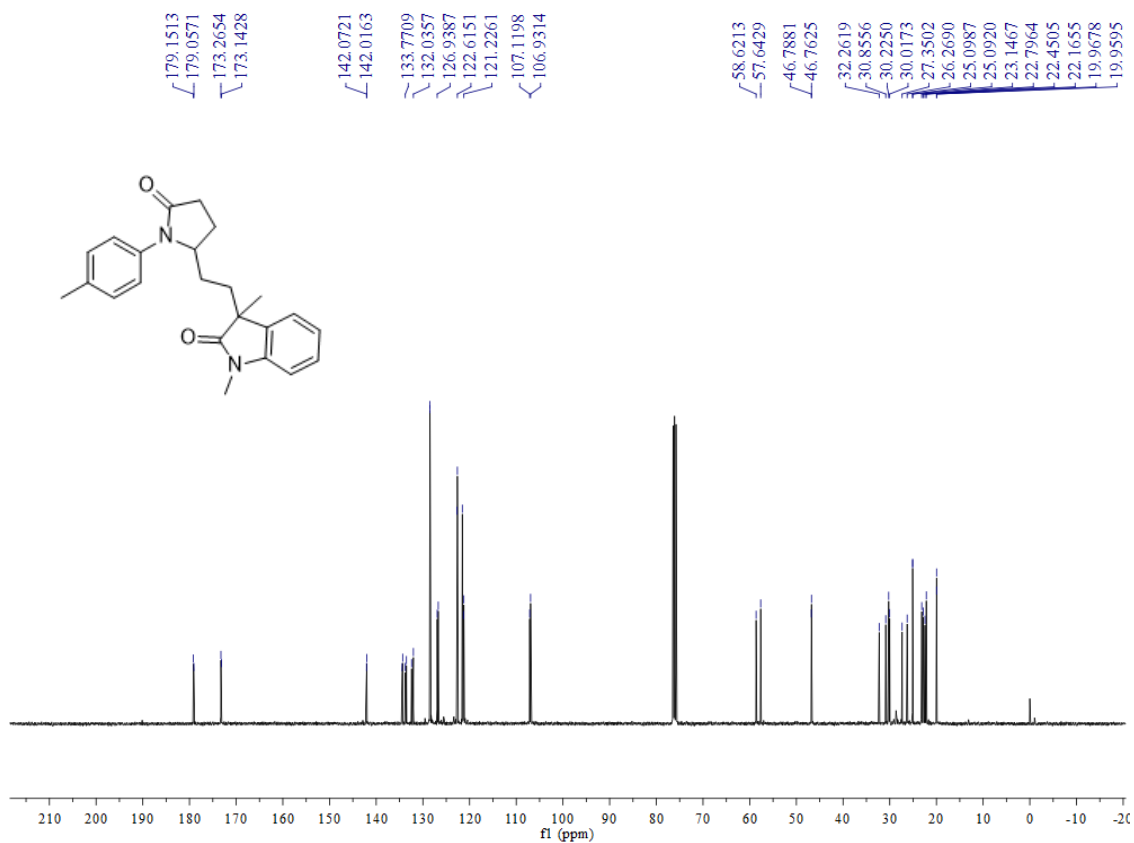

### 3-(2-(1-(4-ethylphenyl)-5-oxopyrrolidin-2-yl)ethyl)-1,3-dimethylindolin-2-one (3ca)

$^1\text{H}$  NMR (400 MHz,  $\text{CDCl}_3$ )

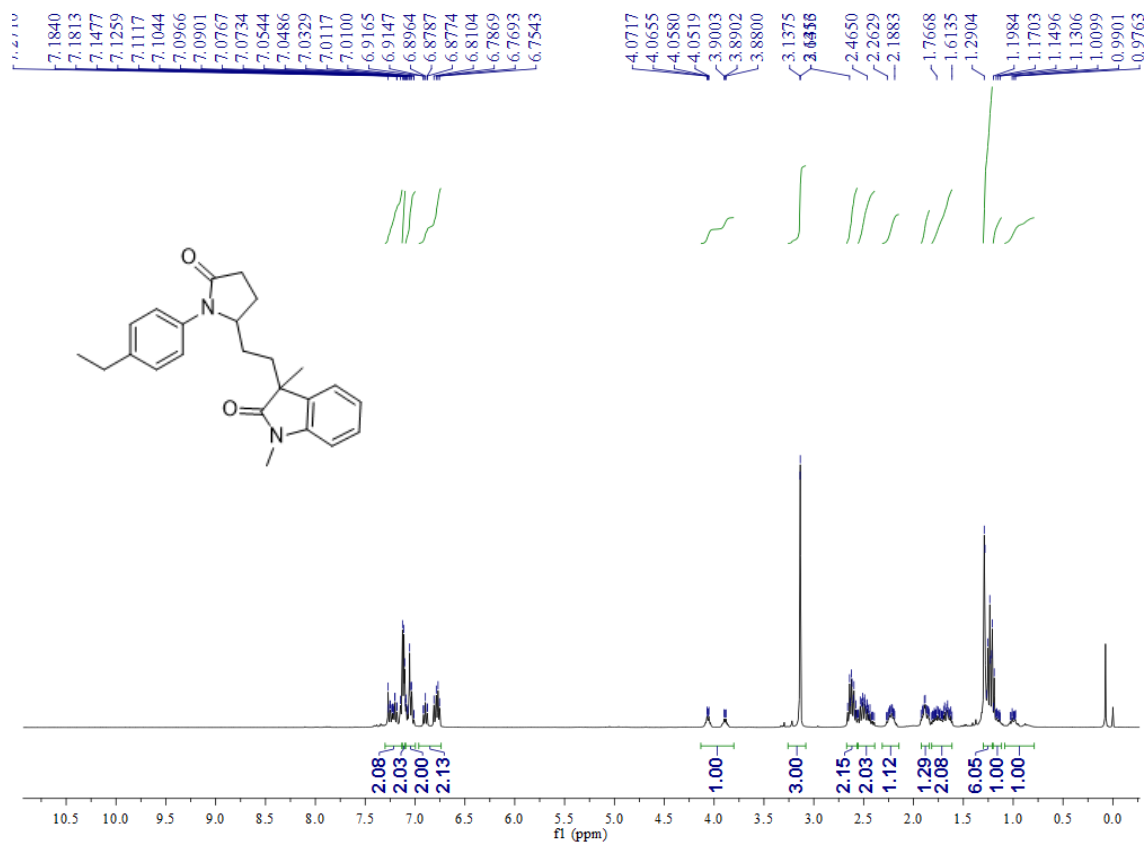

$^{13}\text{C}$  NMR (100 MHz,  $\text{CDCl}_3$ )

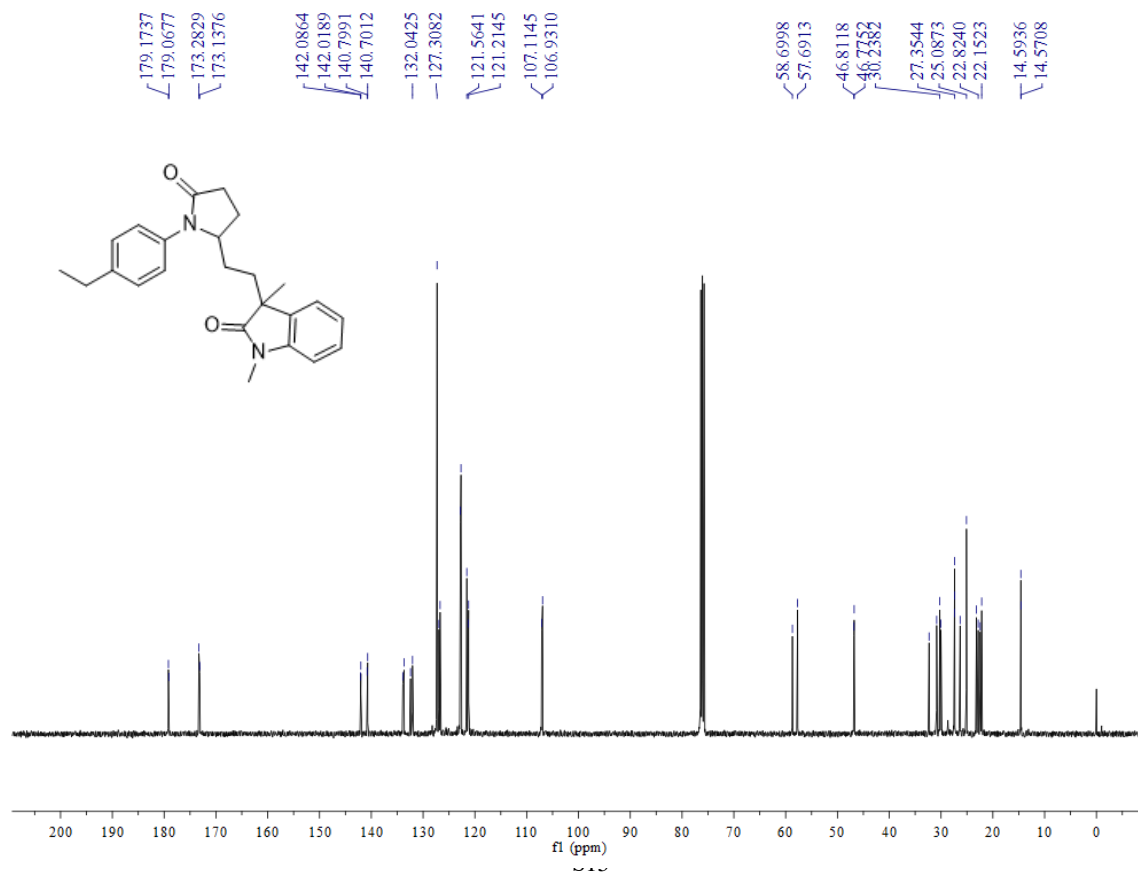

**3-(2-(1-(4-fluorophenyl)-5-oxopyrrolidin-2-yl)ethyl)-1,3-dimethylindolin-2-one (3da)**

<sup>1</sup>H NMR (400 MHz, CDCl<sub>3</sub>)

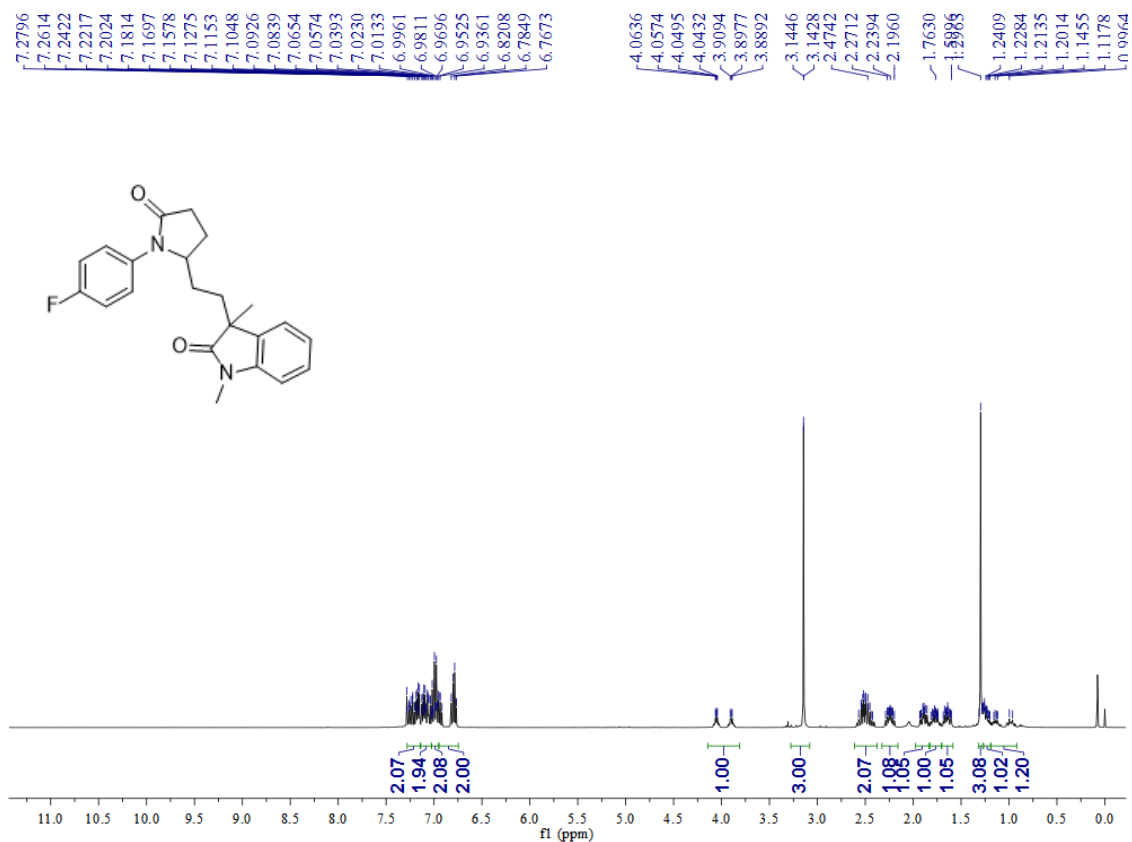

<sup>13</sup>C NMR (100 MHz, CDCl<sub>3</sub>)

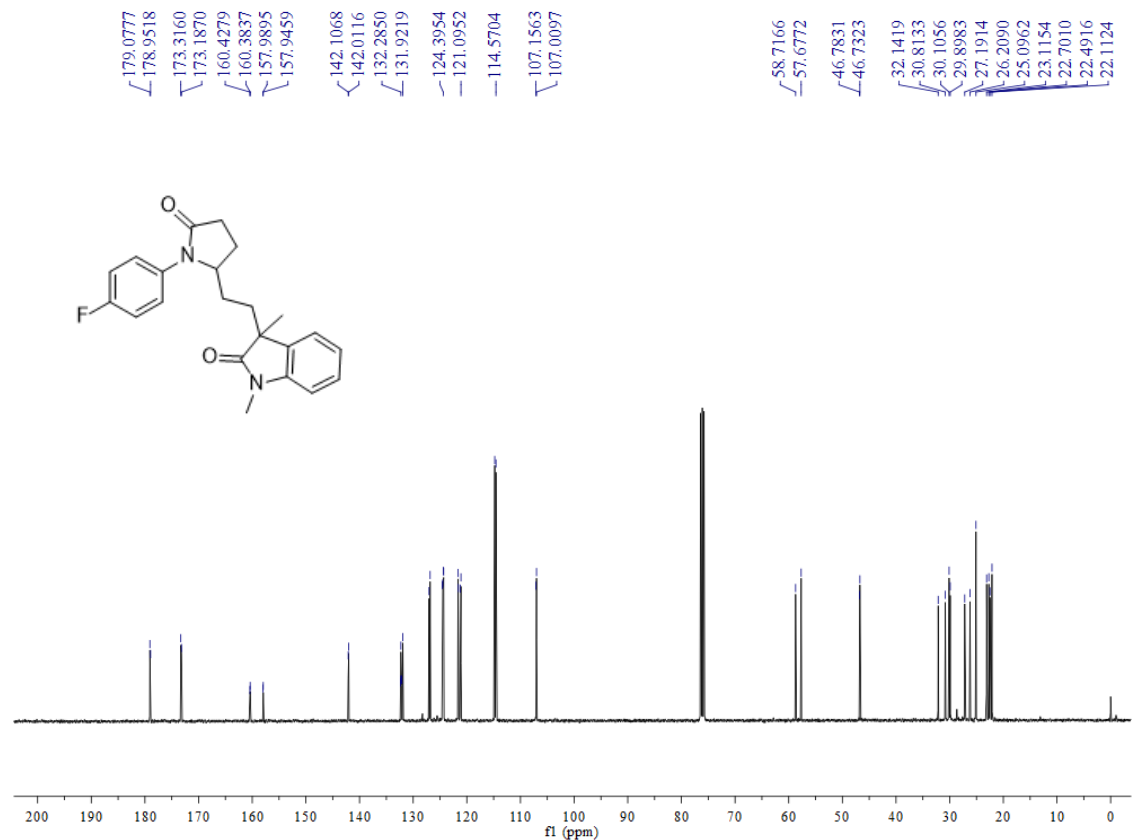



$^{19}\text{F}$  NMR (376 MHz,  $\text{CDCl}_3$ )

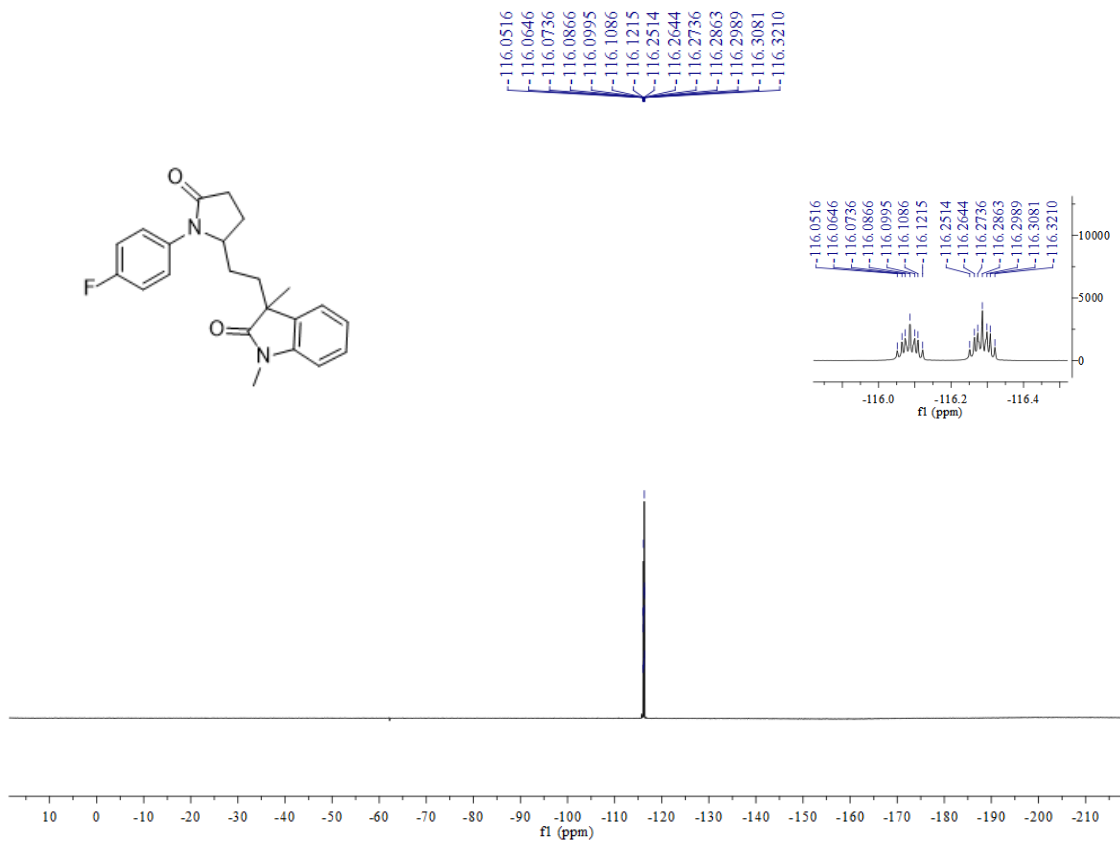

**3-(2-(1-(4-chlorophenyl)-5-oxopyrrolidin-2-yl)ethyl)-1,3-dimethylindolin-2-one (3ea)**

$^1\text{H}$  NMR (400 MHz,  $\text{CDCl}_3$ )

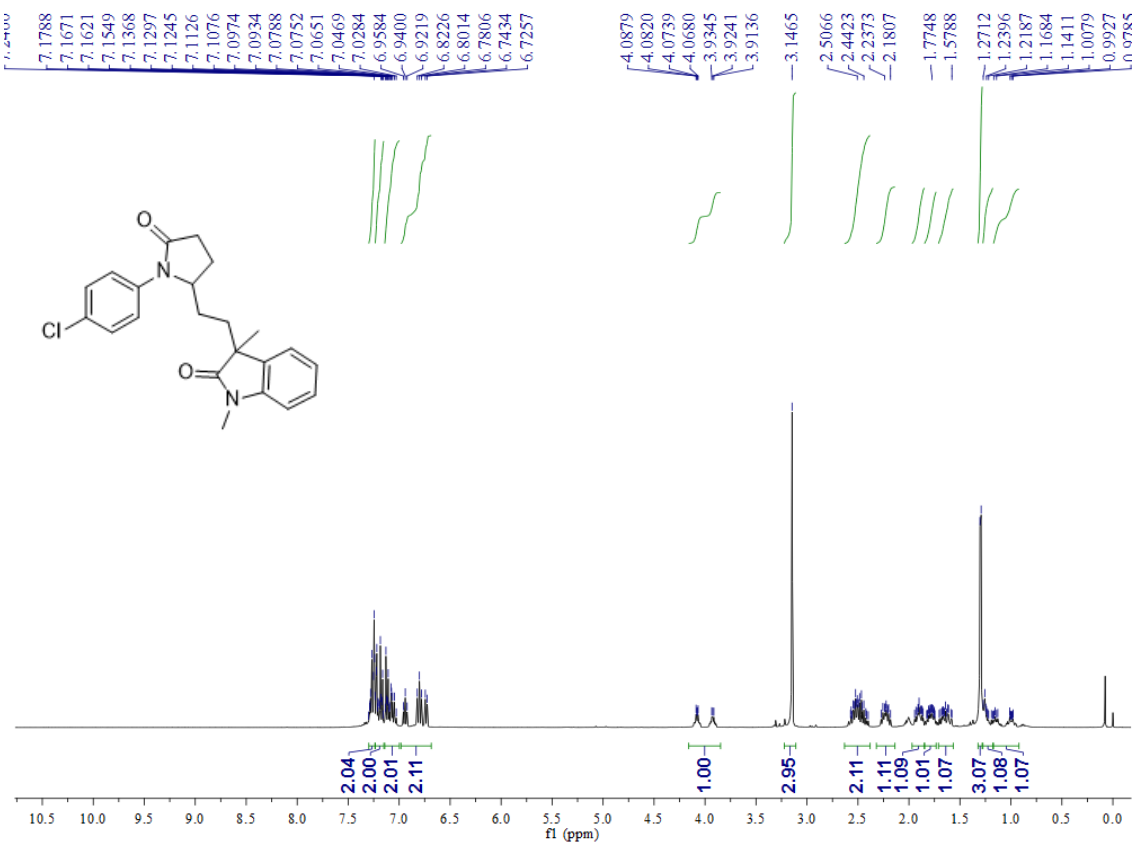

$^{13}\text{C}$  NMR (100 MHz,  $\text{CDCl}_3$ )

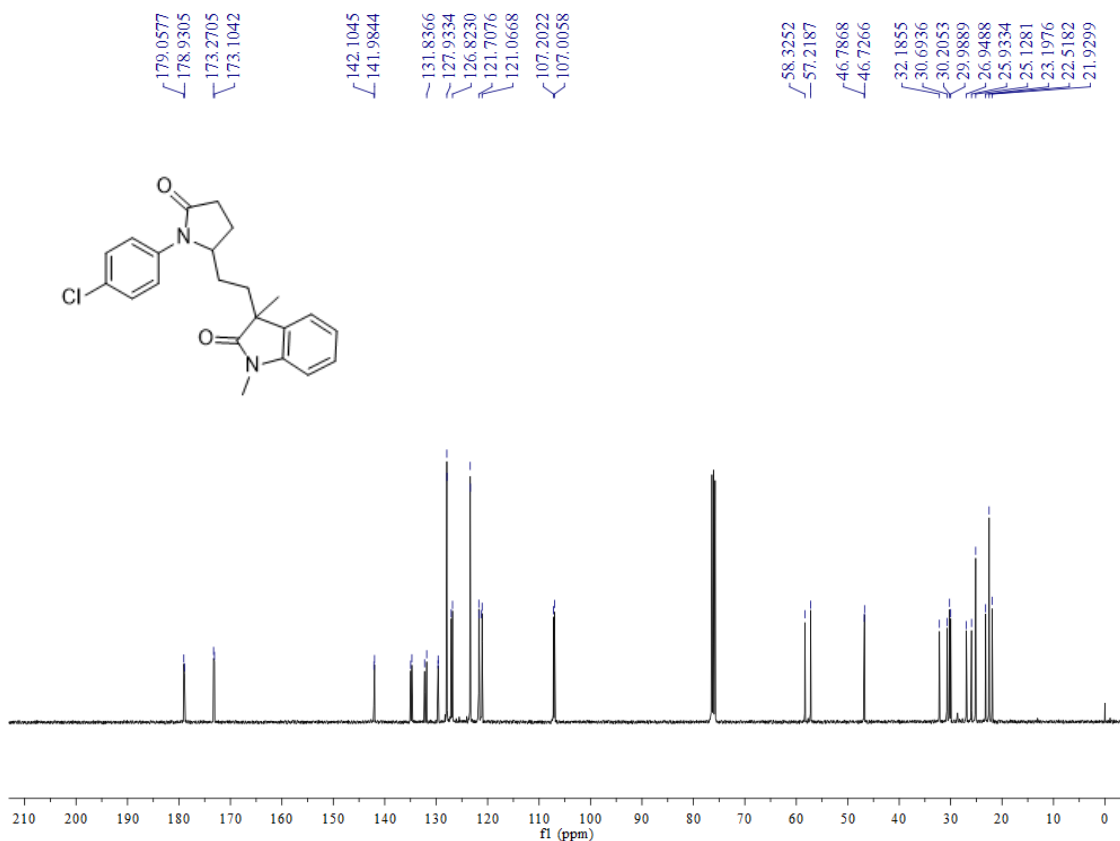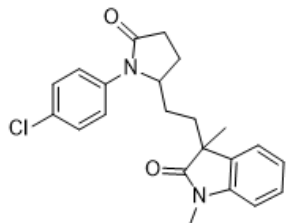

3-(2-(1-(4-bromophenyl)-5-oxopyrrolidin-2-yl)ethyl)-1,3-dimethylindolin-2-one (3fa)

$^1\text{H}$  NMR (400 MHz,  $\text{CDCl}_3$ )

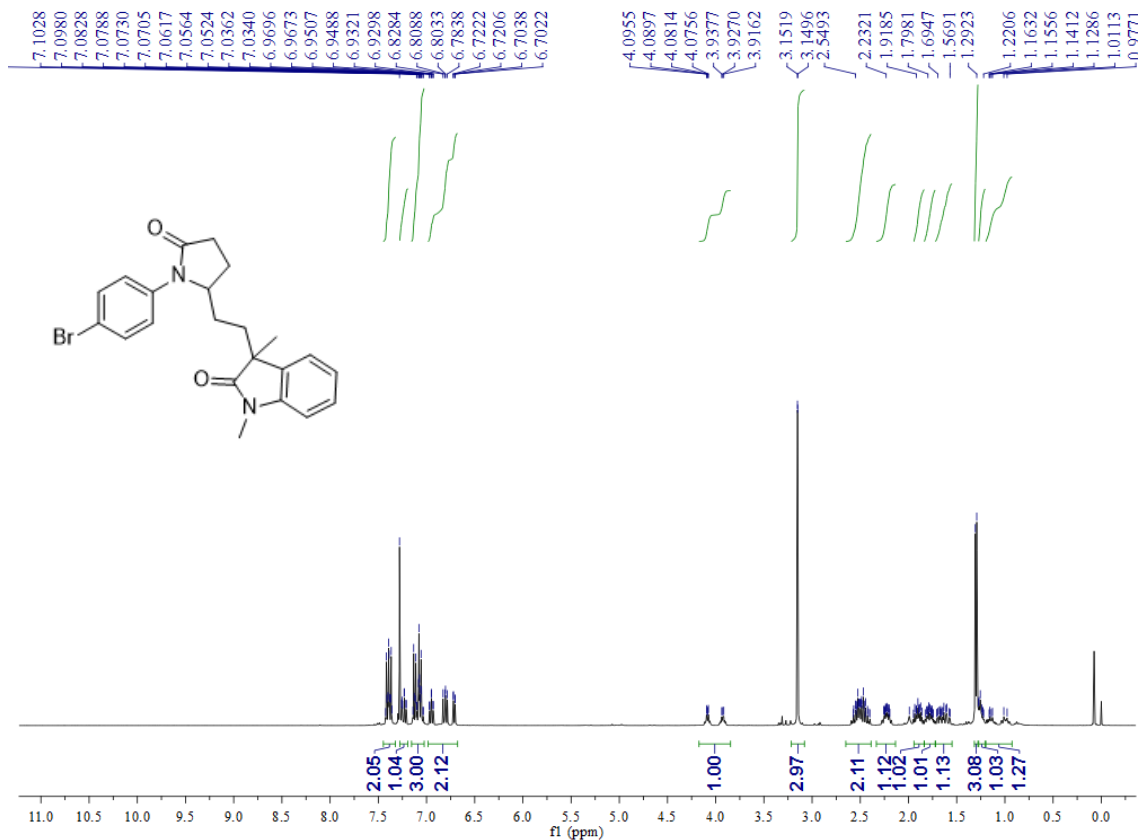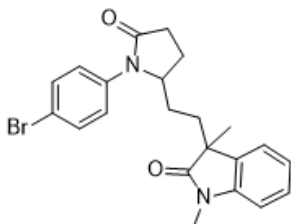

$^{13}\text{C}$  NMR (100 MHz,  $\text{CDCl}_3$ )

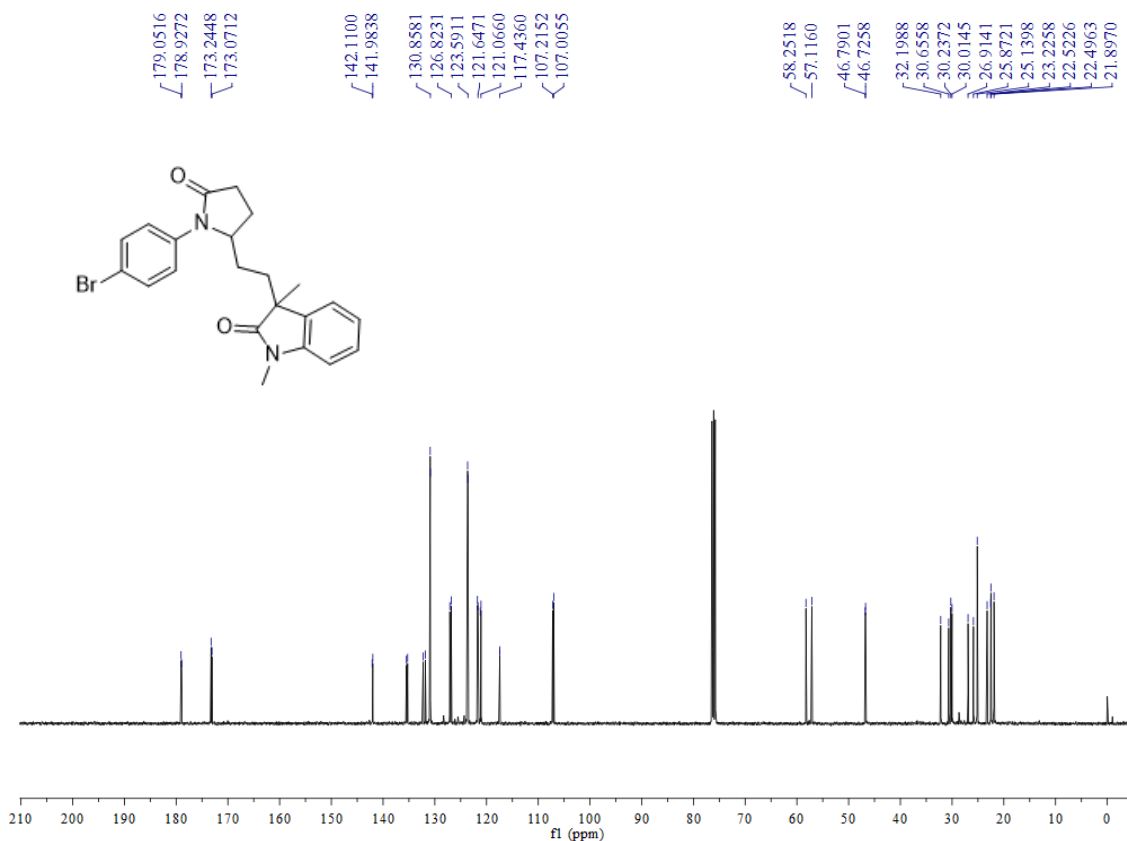

**3-(2-(1-(3-fluorophenyl)-5-oxopyrrolidin-2-yl)ethyl)-1,3-dimethylindolin-2-one (3ga)**

$^1\text{H}$  NMR (400 MHz,  $\text{CDCl}_3$ )

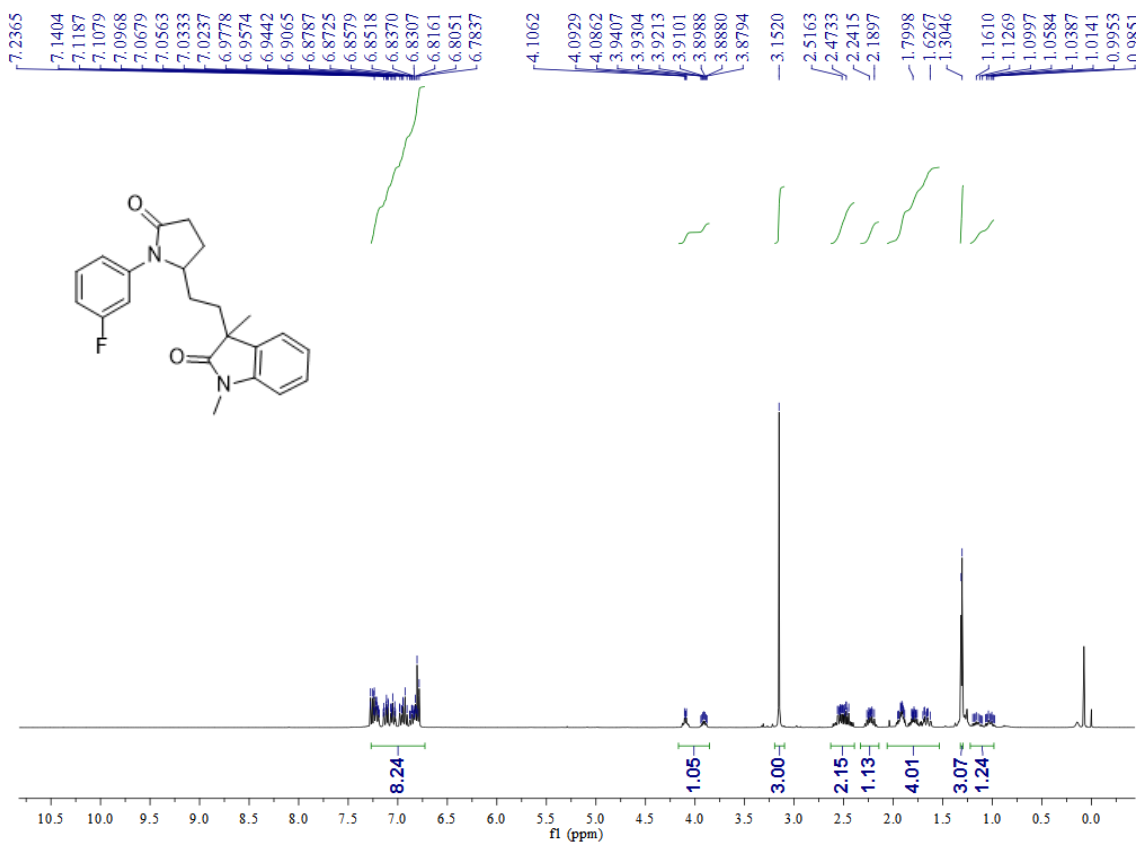

<sup>13</sup>C NMR (100 MHz, CDCl<sub>3</sub>)

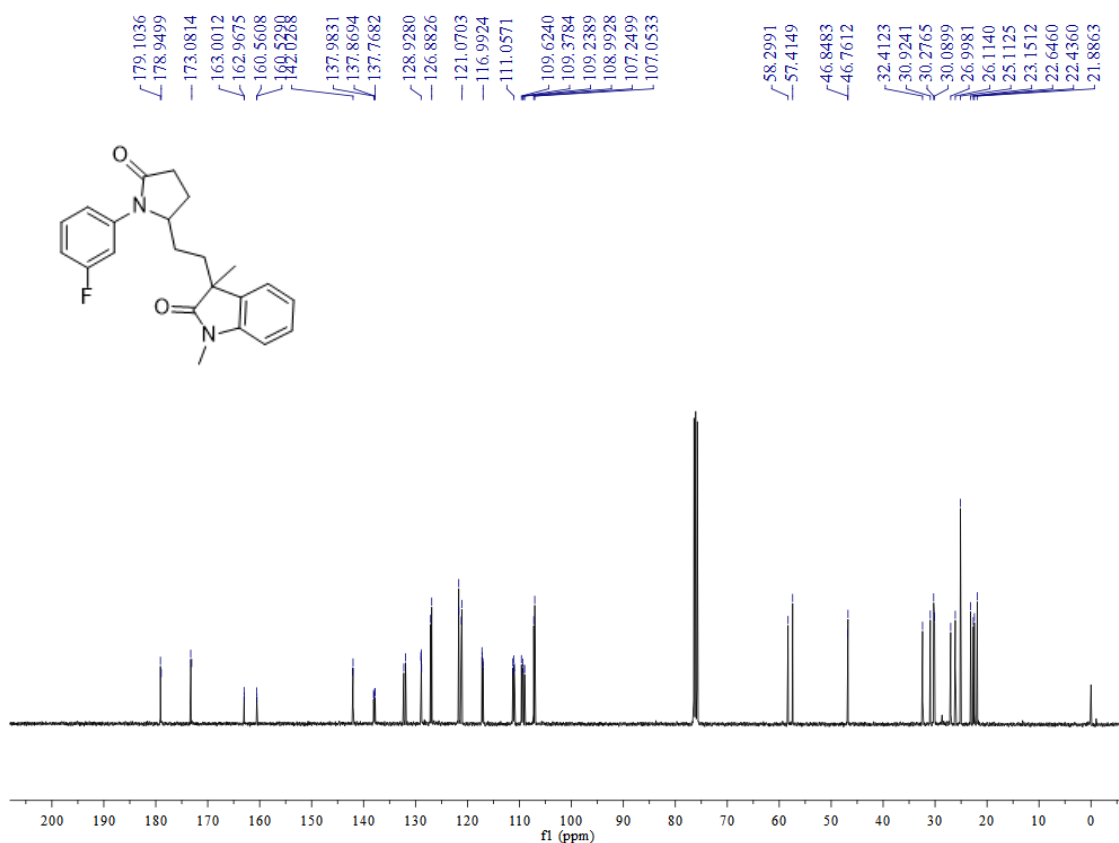

<sup>19</sup>F NMR (376 MHz, CDCl<sub>3</sub>)

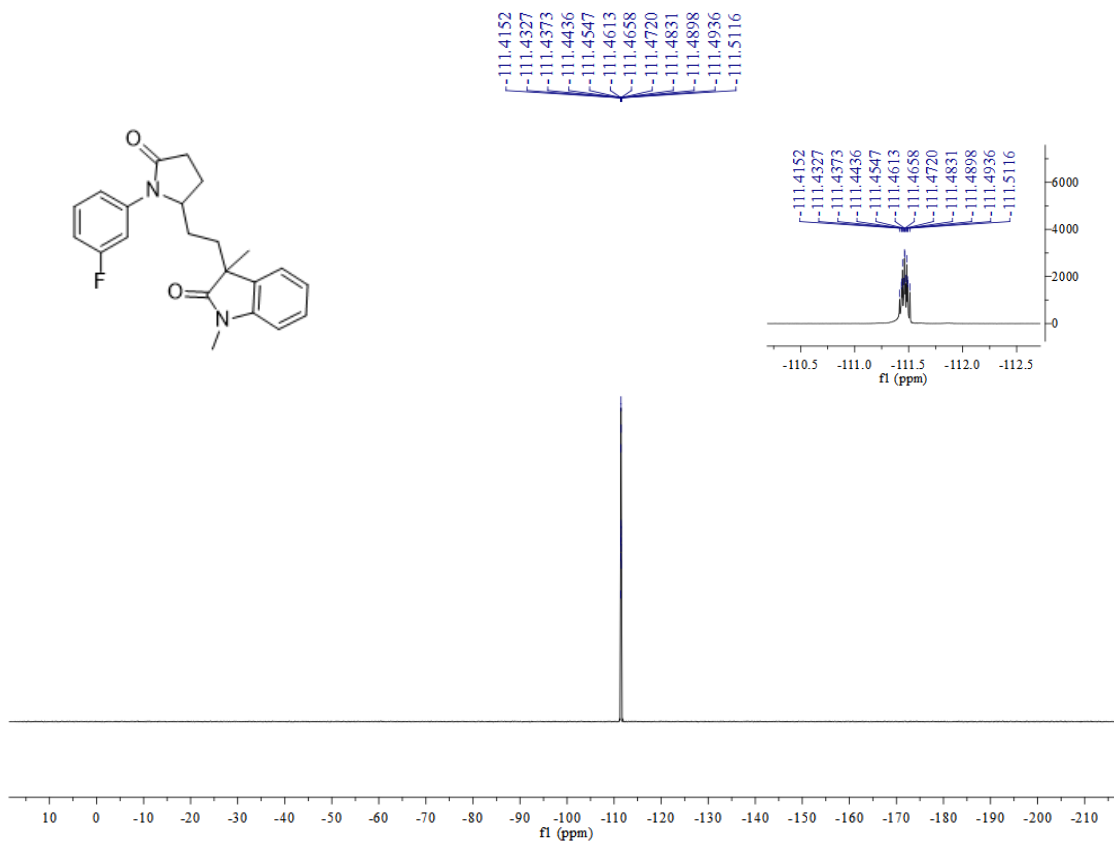

### 3-(2-(1-(3-chlorophenyl)-5-oxopyrrolidin-2-yl)ethyl)-1,3-dimethylindolin-2-one (3ha)

$^1\text{H}$  NMR (400 MHz,  $\text{CDCl}_3$ )

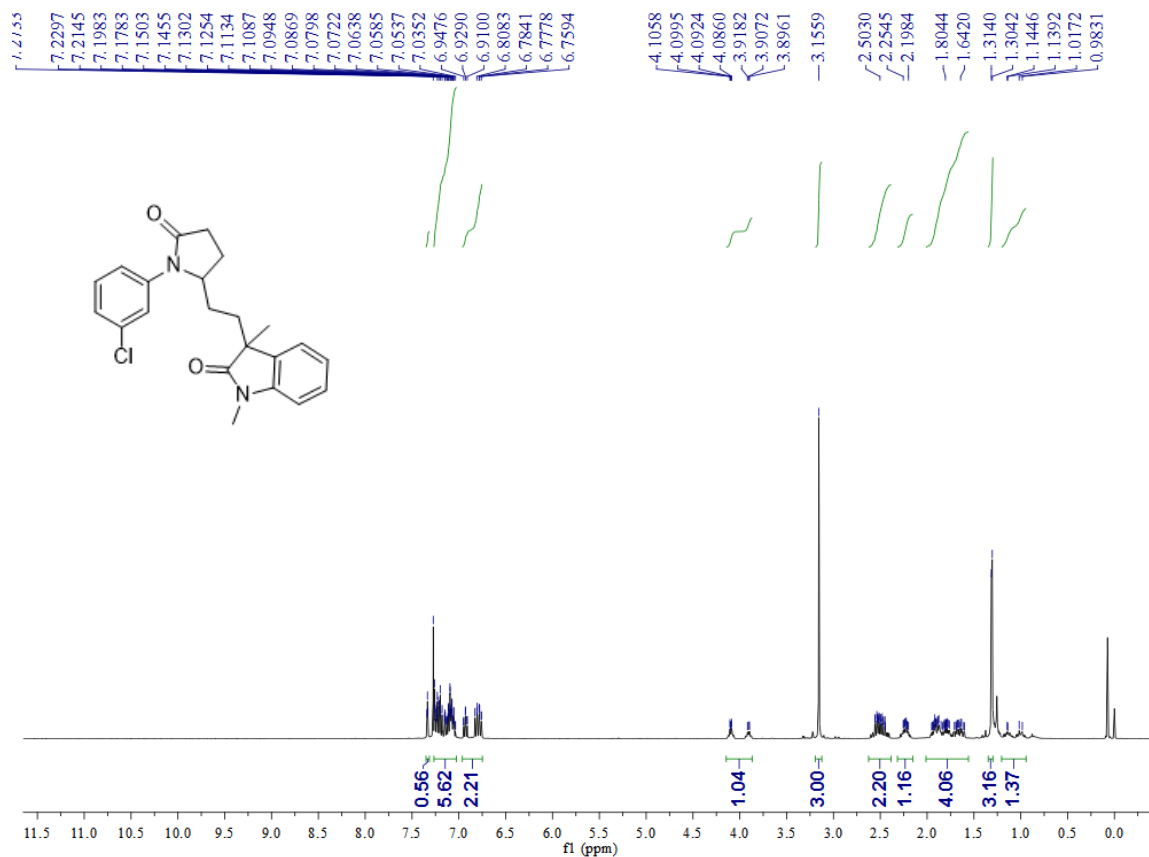

$^{13}\text{C}$  NMR (100 MHz,  $\text{CDCl}_3$ )

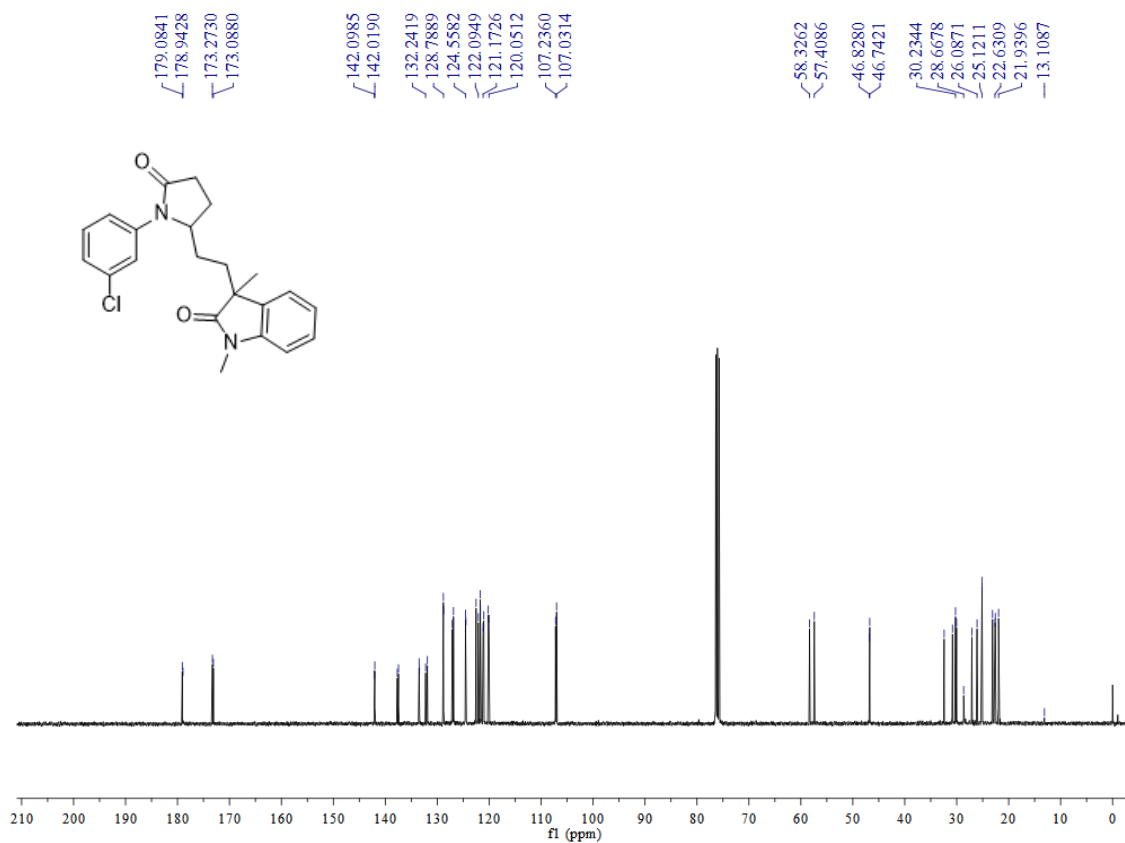

### 1,3-dimethyl-3-(2-(5-oxo-1-(*o*-tolyl)pyrrolidin-2-yl)ethyl)indolin-2-one (3ia)

<sup>1</sup>H NMR (400 MHz, CDCl<sub>3</sub>)

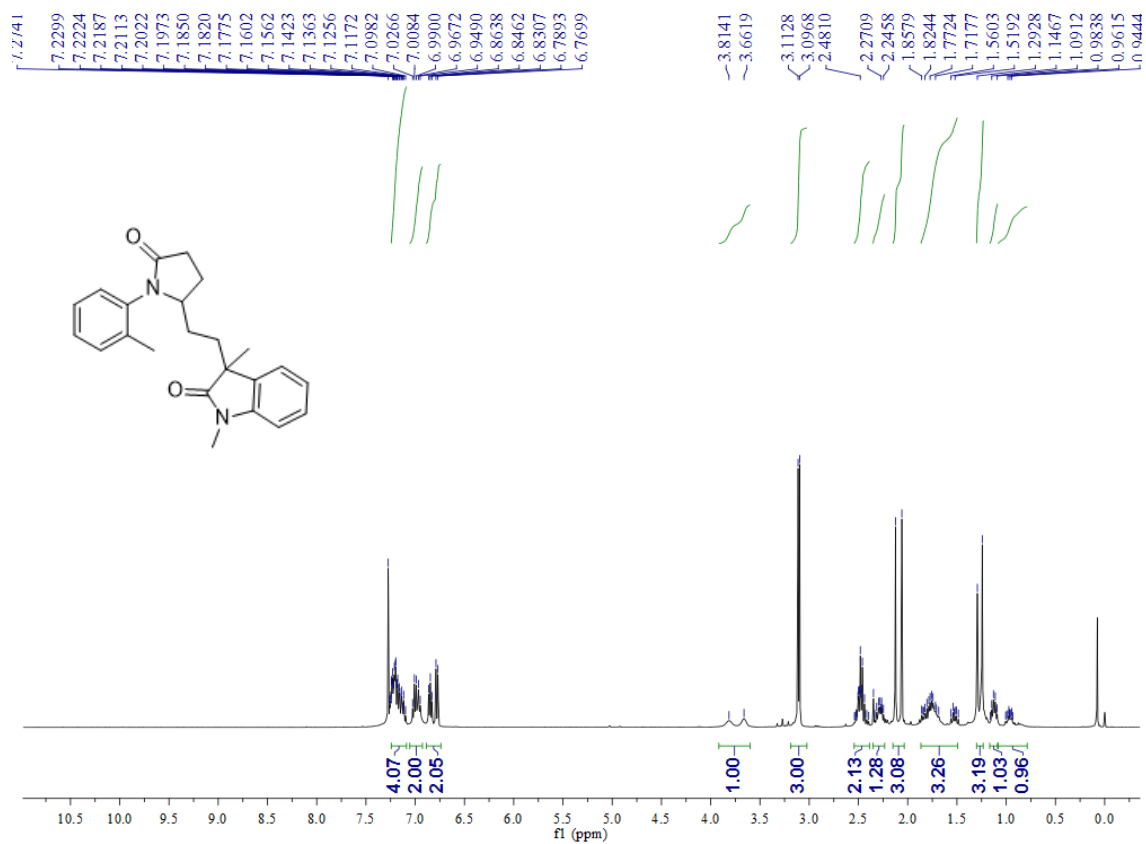

<sup>13</sup>C NMR (100 MHz, CDCl<sub>3</sub>)

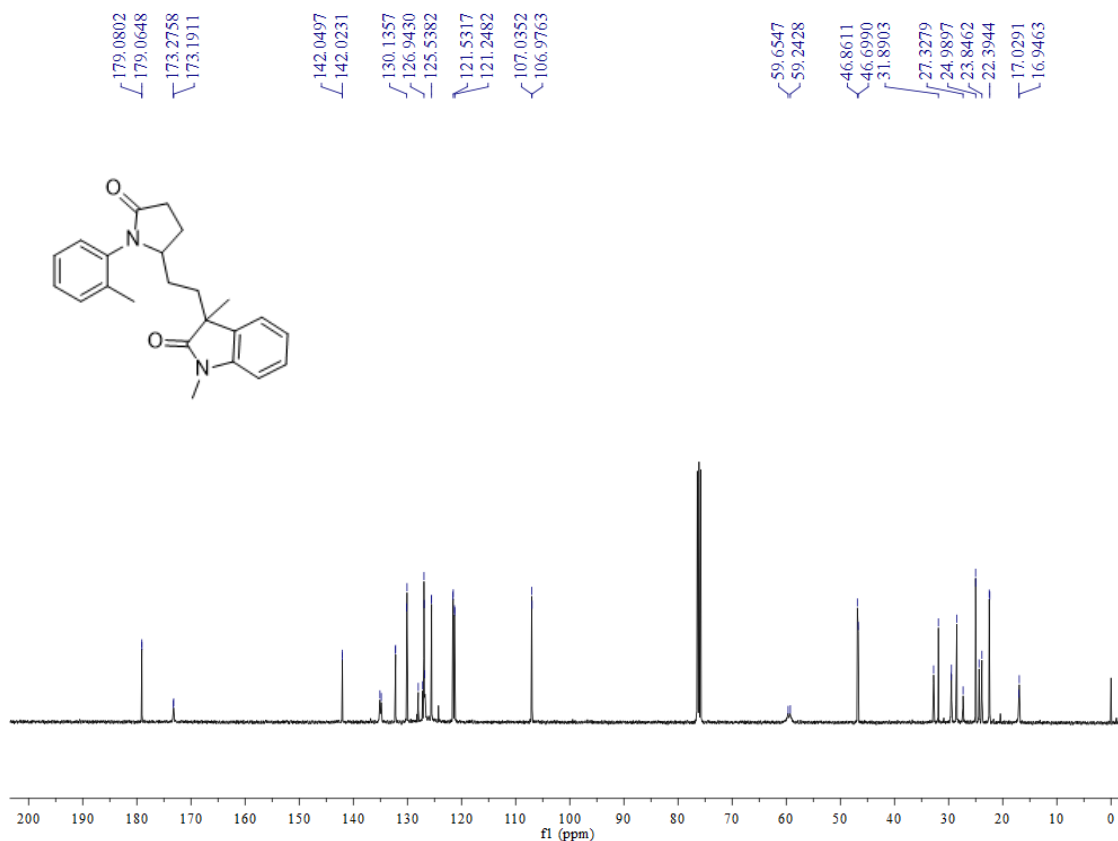

### 3-(2-(1-(2-fluorophenyl)-5-oxopyrrolidin-2-yl)ethyl)-1,3-dimethylindolin-2-one (3ja)

<sup>1</sup>H NMR (400 MHz, CDCl<sub>3</sub>)

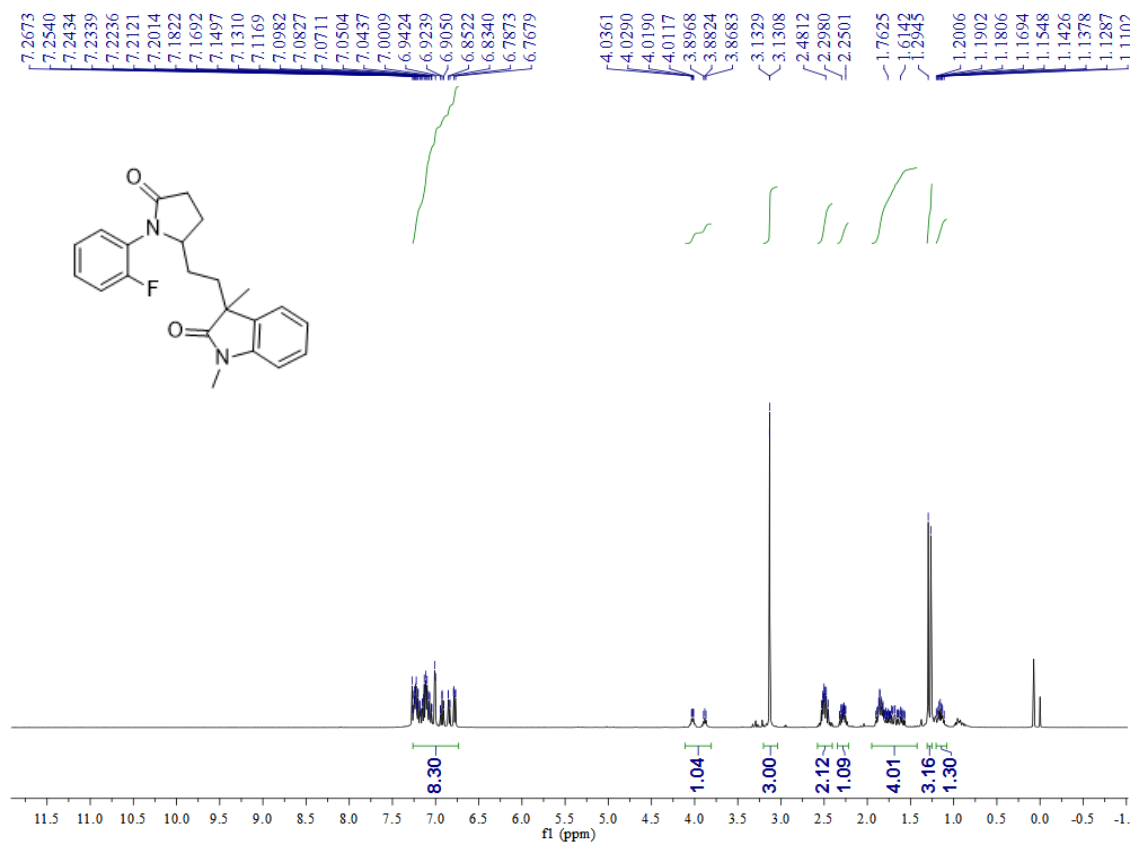

<sup>13</sup>C NMR (100 MHz, CDCl<sub>3</sub>)

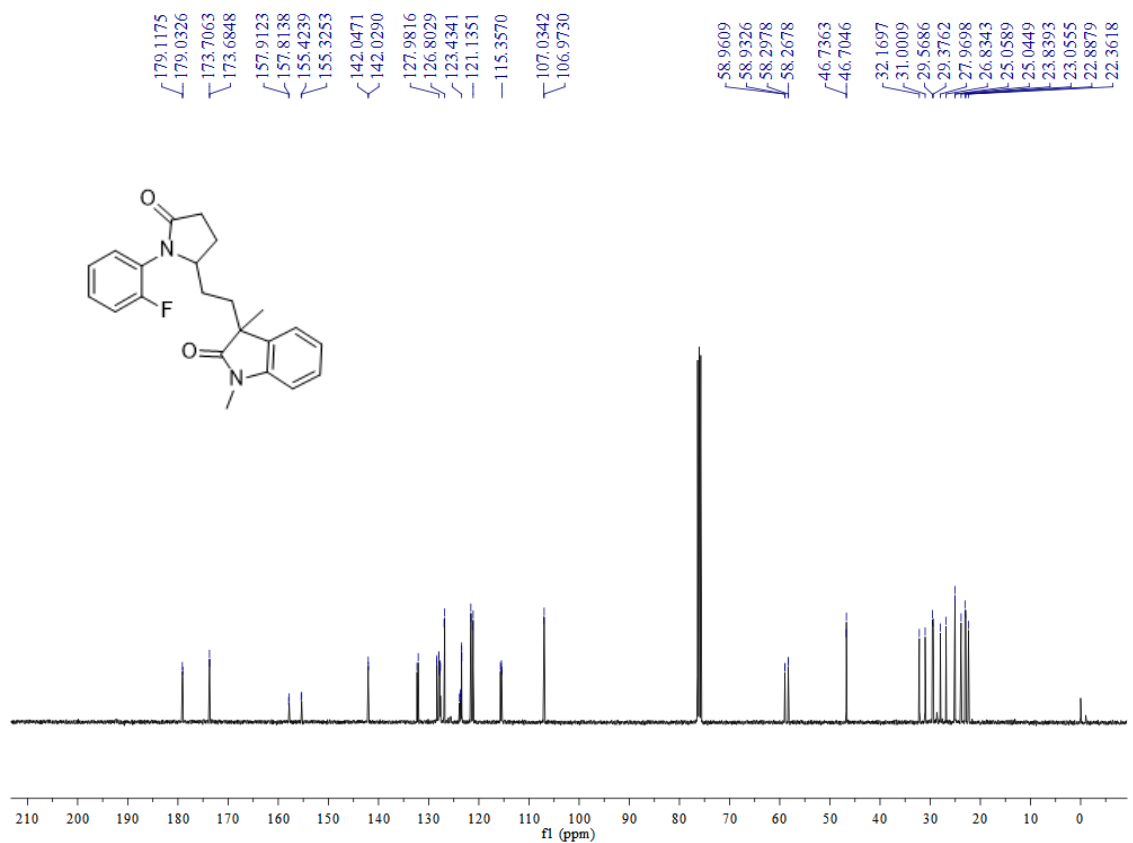

$^{19}\text{F}$  NMR (376 MHz,  $\text{CDCl}_3$ )

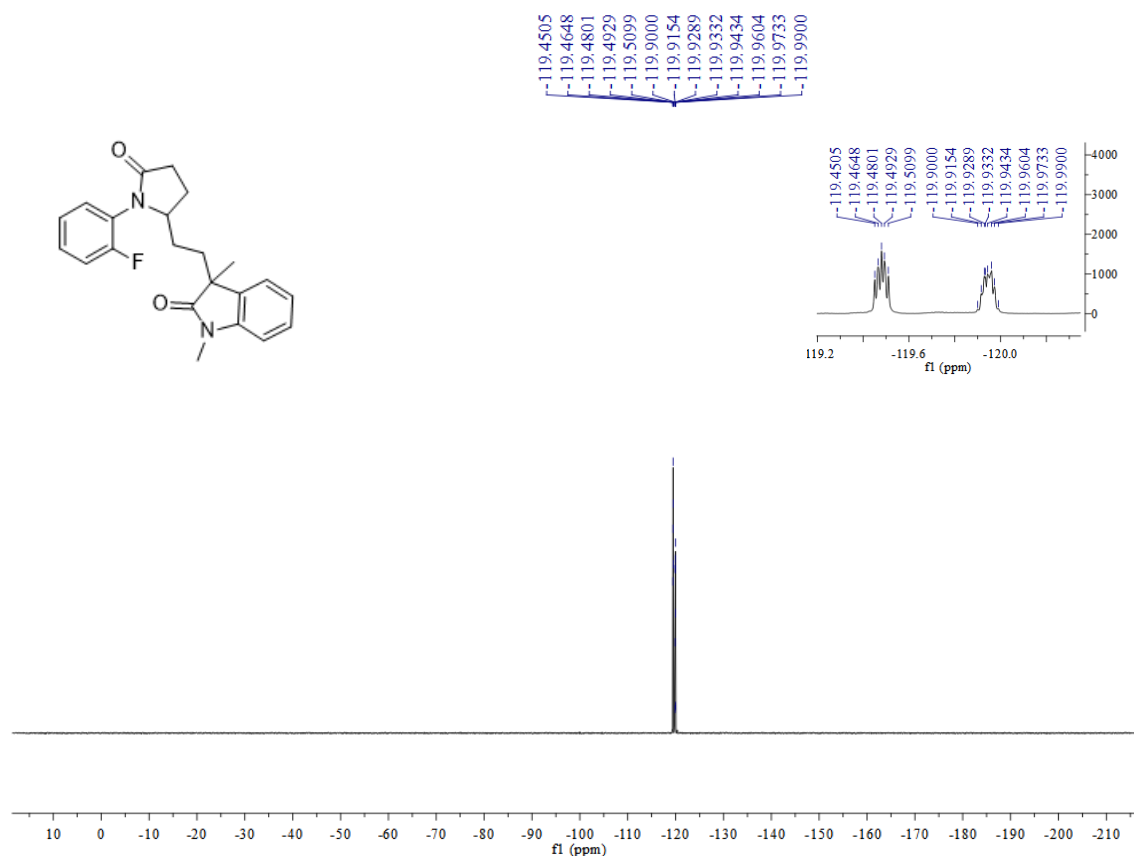

**3-(2-(1-(2-bromophenyl)-5-oxopyrrolidin-2-yl)ethyl)-1,3-dimethylindolin-2-one (3ka)**

$^1\text{H}$  NMR (400 MHz,  $\text{CDCl}_3$ )

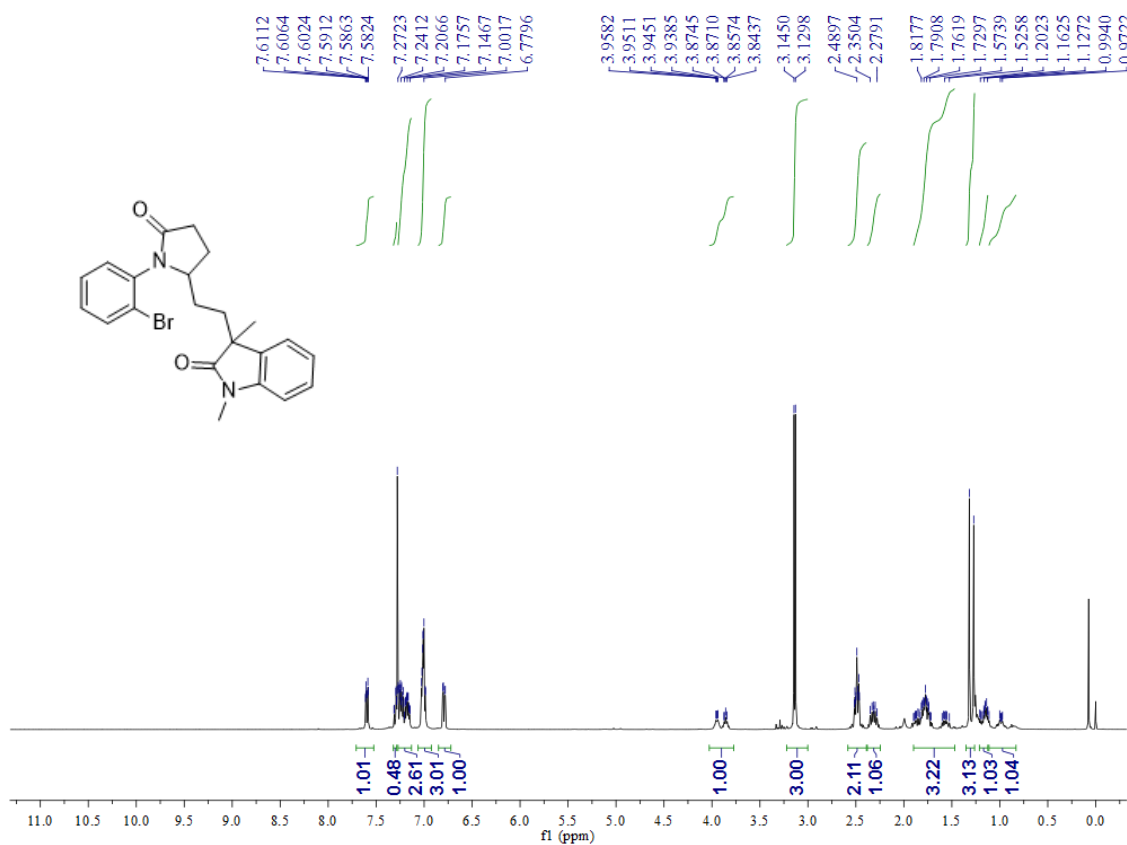



$^{13}\text{C}$  NMR (100 MHz,  $\text{CDCl}_3$ )

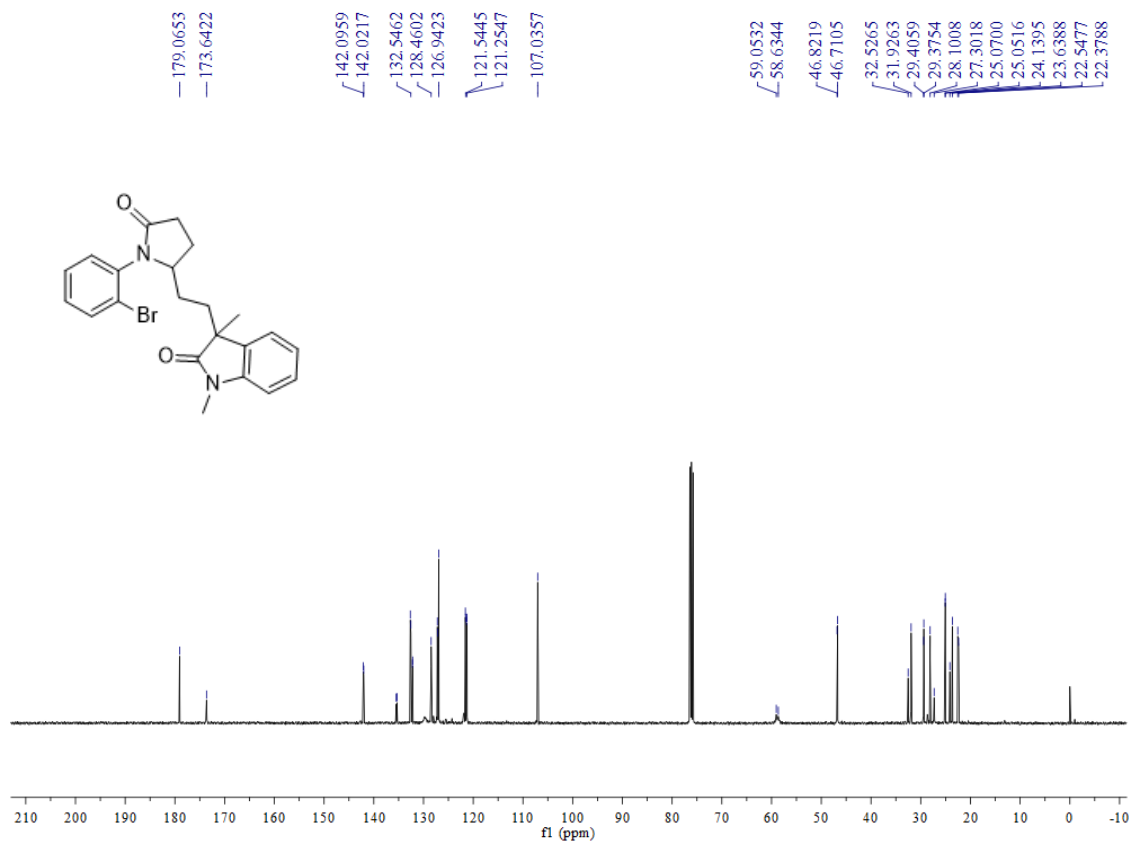

3-(2-(1-(5-chloro-2-methylphenyl)-5-oxopyrrolidin-2-yl)ethyl)-1,3-dimethylindolin-2-one (3la)

$^1\text{H}$  NMR (400 MHz,  $\text{CDCl}_3$ )

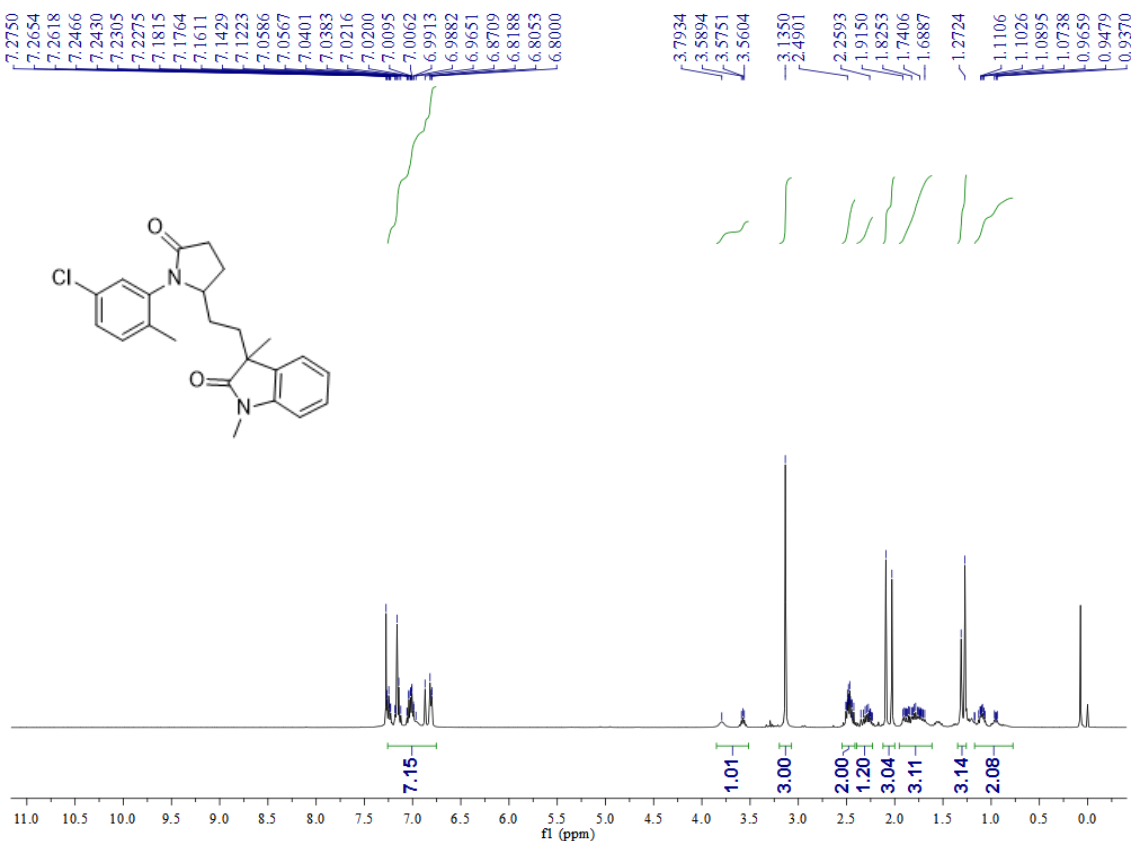

$^{13}\text{C}$  NMR (100 MHz,  $\text{CDCl}_3$ )

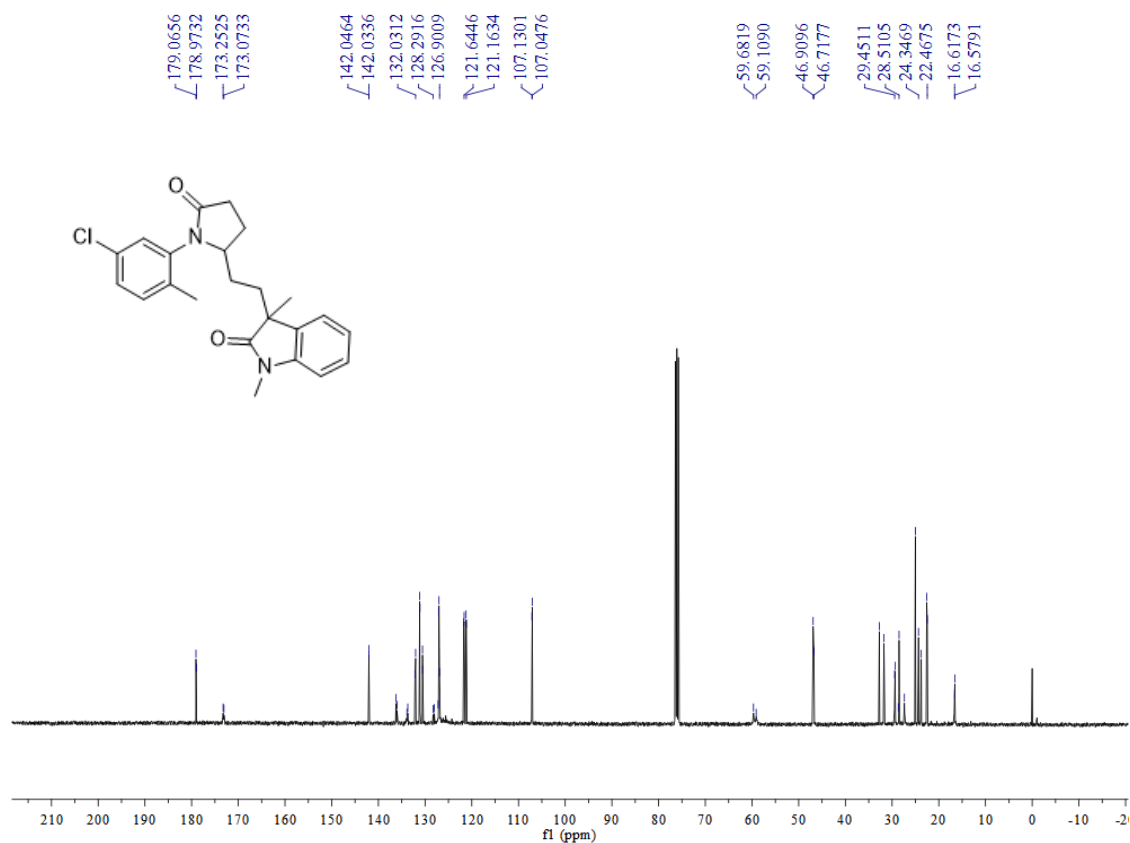

**3-(2-(1-(2-fluoro-4-methylphenyl)-5-oxopyrrolidin-2-yl)ethyl)-1,3-dimethylindolin-2-one (3ma)**

$^1\text{H}$  NMR (400 MHz,  $\text{CDCl}_3$ )

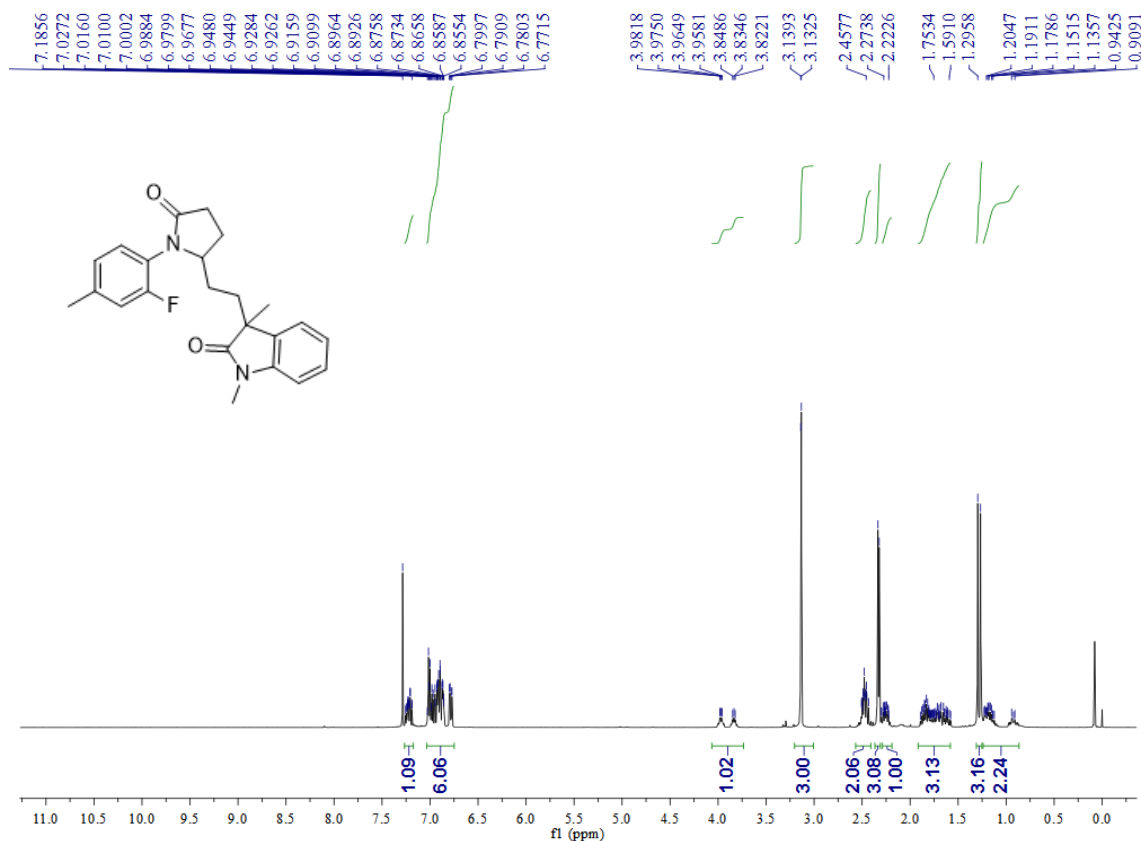

<sup>13</sup>C NMR (100 MHz, CDCl<sub>3</sub>)

179.0990  
179.0456  
173.7480  
157.6536  
157.5449  
155.1713  
155.0627  
142.0218  
138.4734  
138.3222  
126.8660  
121.4931  
120.6715  
115.8113  
107.0252  
106.9652  
58.9342  
58.9088  
58.3106  
58.2835  
46.7117  
46.7041  
32.1211  
31.0496  
29.5140  
29.3317  
27.9102  
26.7893  
25.0479  
25.0313  
23.7605  
23.0354  
22.8741  
22.3146  
20.0796  
20.0642

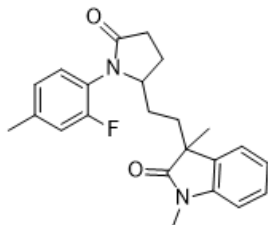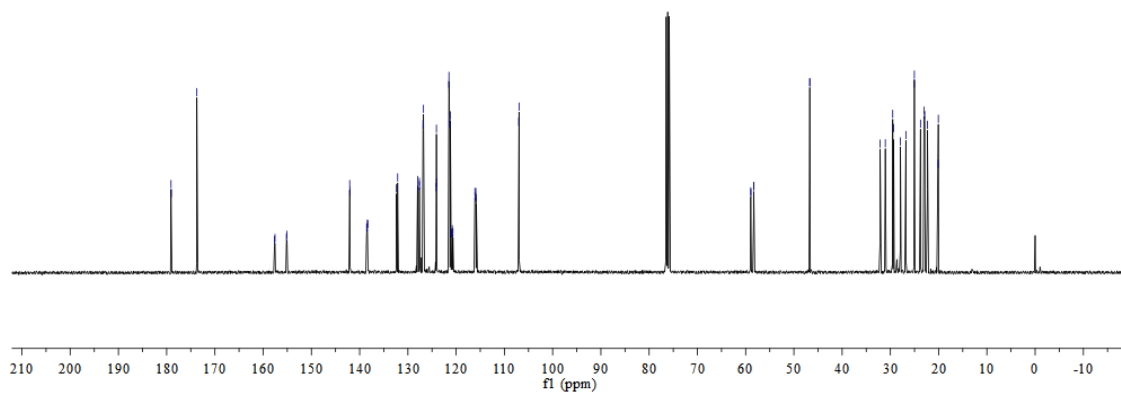

<sup>19</sup>F NMR (376 MHz, CDCl<sub>3</sub>)

-120.5985  
-120.6200  
-120.6286  
-120.6490  
-121.0301  
-121.0512  
-121.0597  
-121.0800

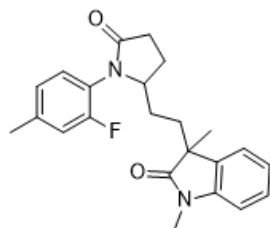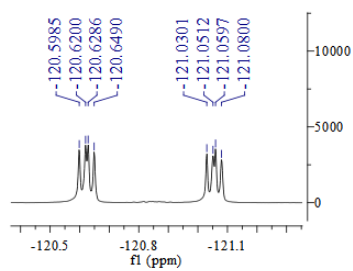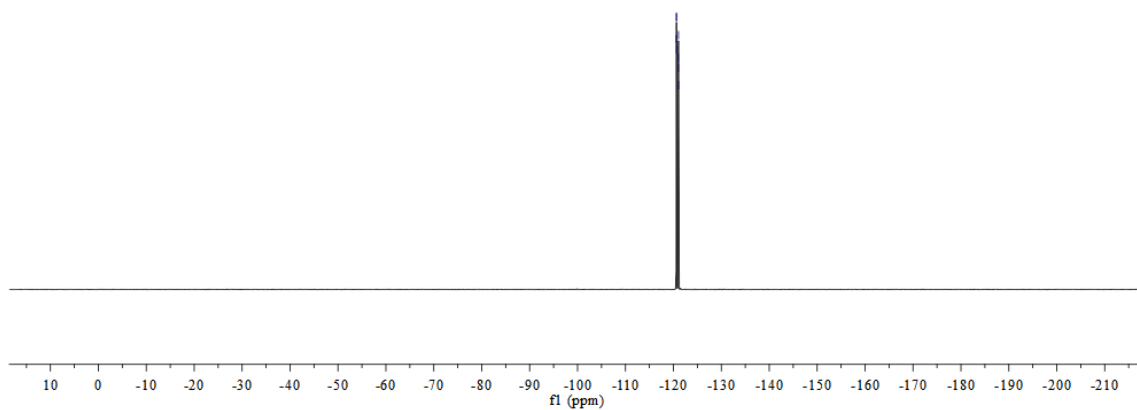

### 3-(2-(1-(3-fluoro-4-methylphenyl)-5-oxopyrrolidin-2-yl)ethyl)-1,3-dimethylindolin-2-one (3na)

<sup>1</sup>H NMR (400 MHz, CDCl<sub>3</sub>)

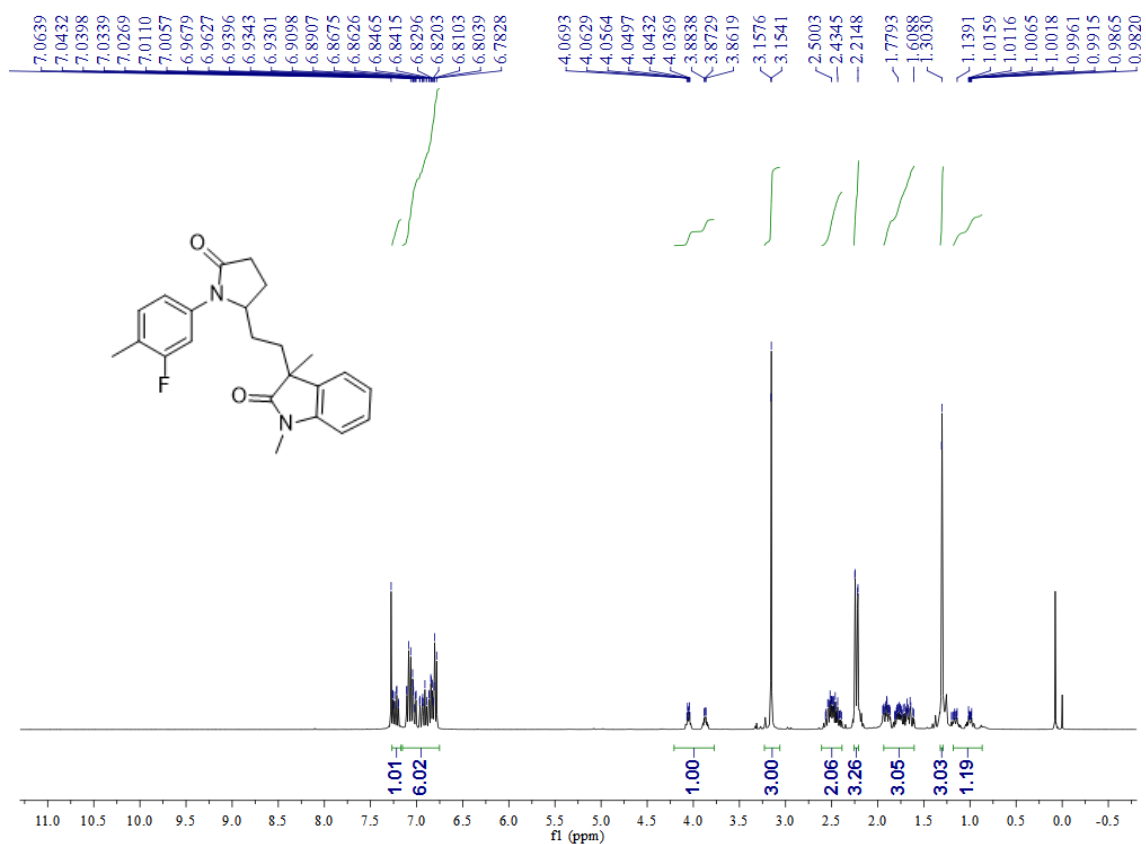

<sup>13</sup>C NMR (100 MHz, CDCl<sub>3</sub>)

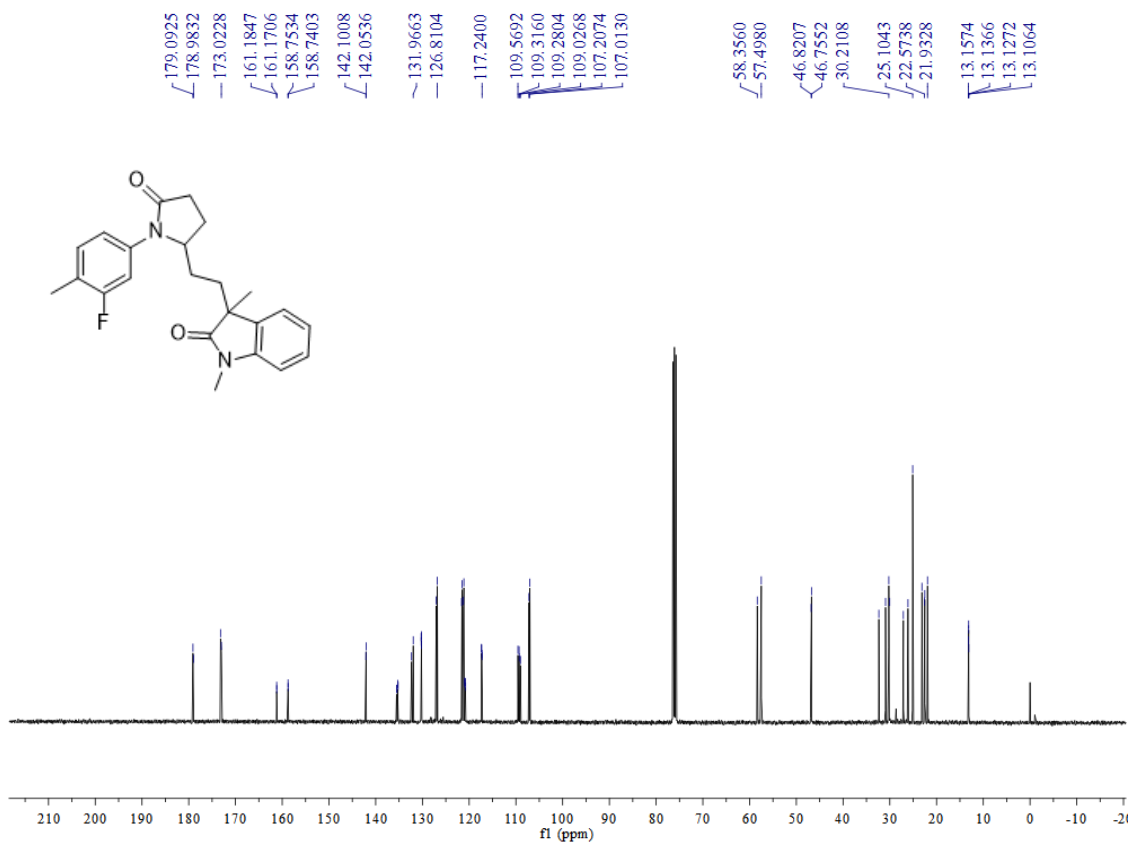

$^{19}\text{F}$  NMR (376 MHz,  $\text{CDCl}_3$ )

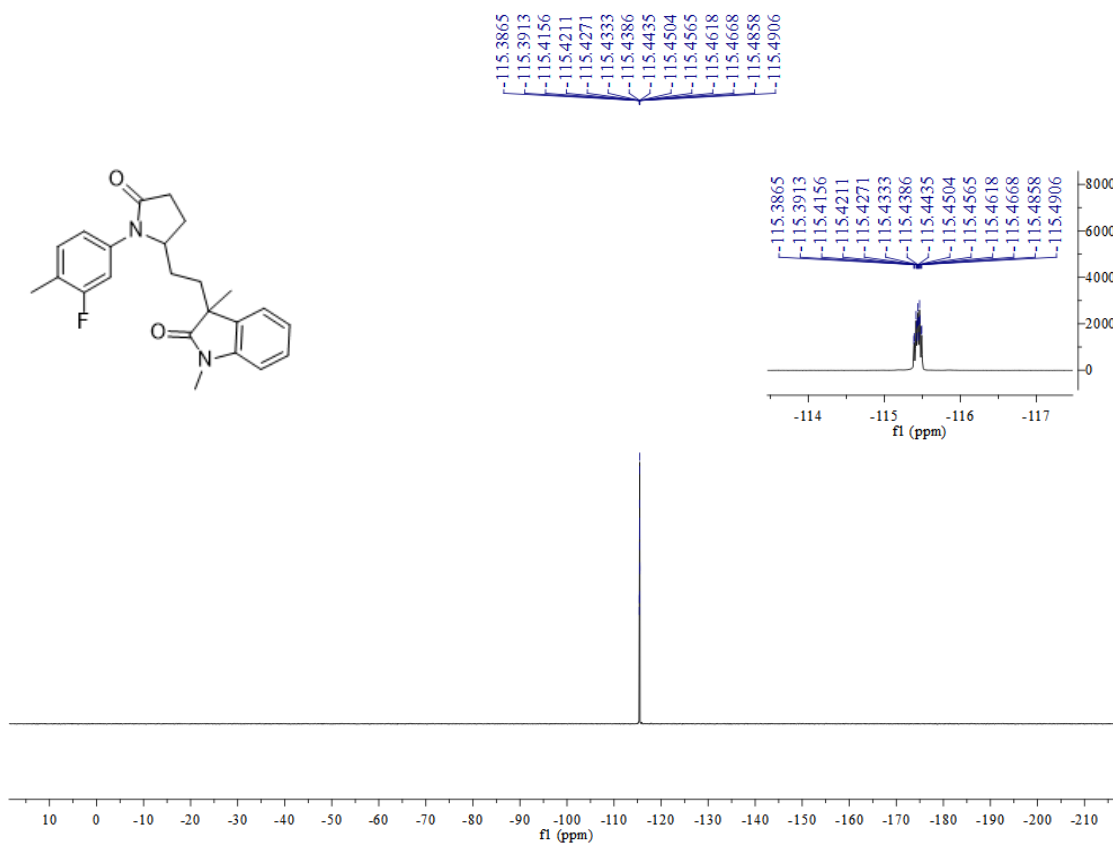

3-(2-(1-(3-chloro-4-methylphenyl)-5-oxopyrrolidin-2-yl)ethyl)-1,3-dimethylindolin-2-one (3oa)

$^1\text{H}$  NMR (400 MHz,  $\text{CDCl}_3$ )

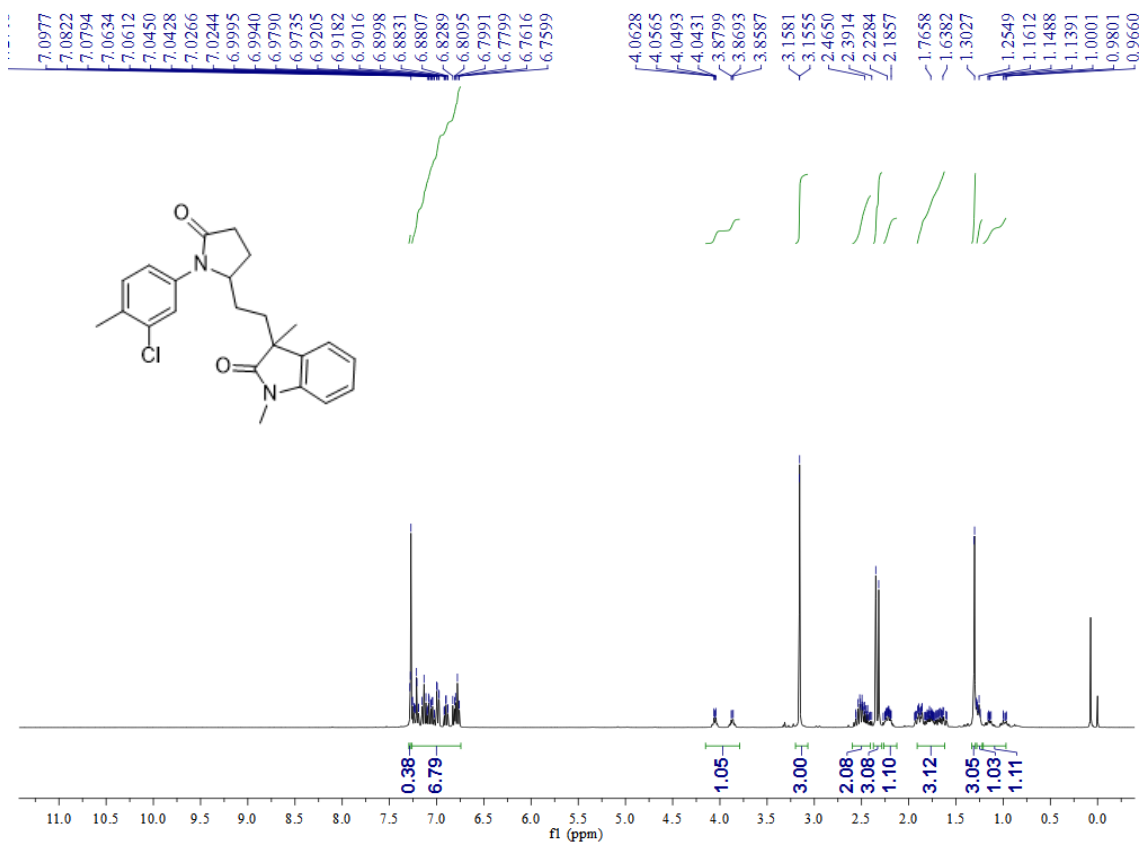

$^{13}\text{C}$  NMR (100 MHz,  $\text{CDCl}_3$ )

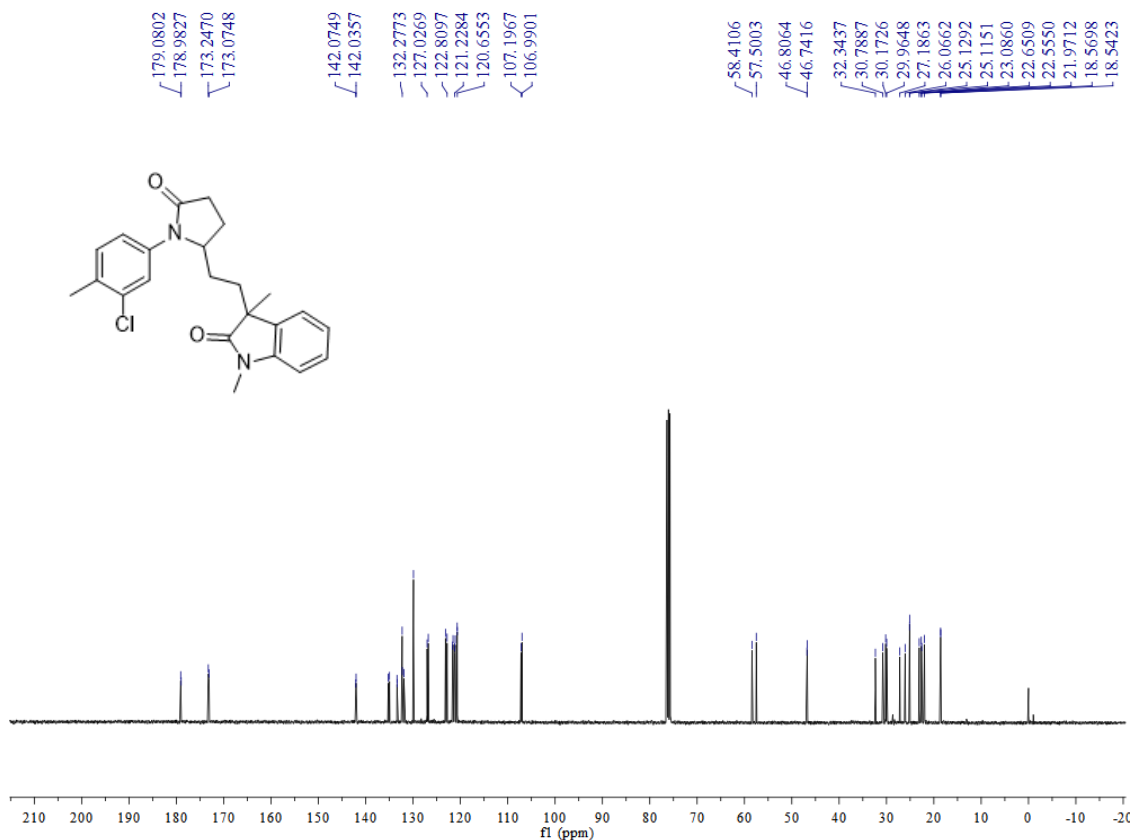

**3-(2-(1-(3-bromo-4-methylphenyl)-5-oxopyrrolidin-2-yl)ethyl)-1,3-dimethylindolin-2-one (3pa)**

$^1\text{H}$  NMR (400 MHz,  $\text{CDCl}_3$ )

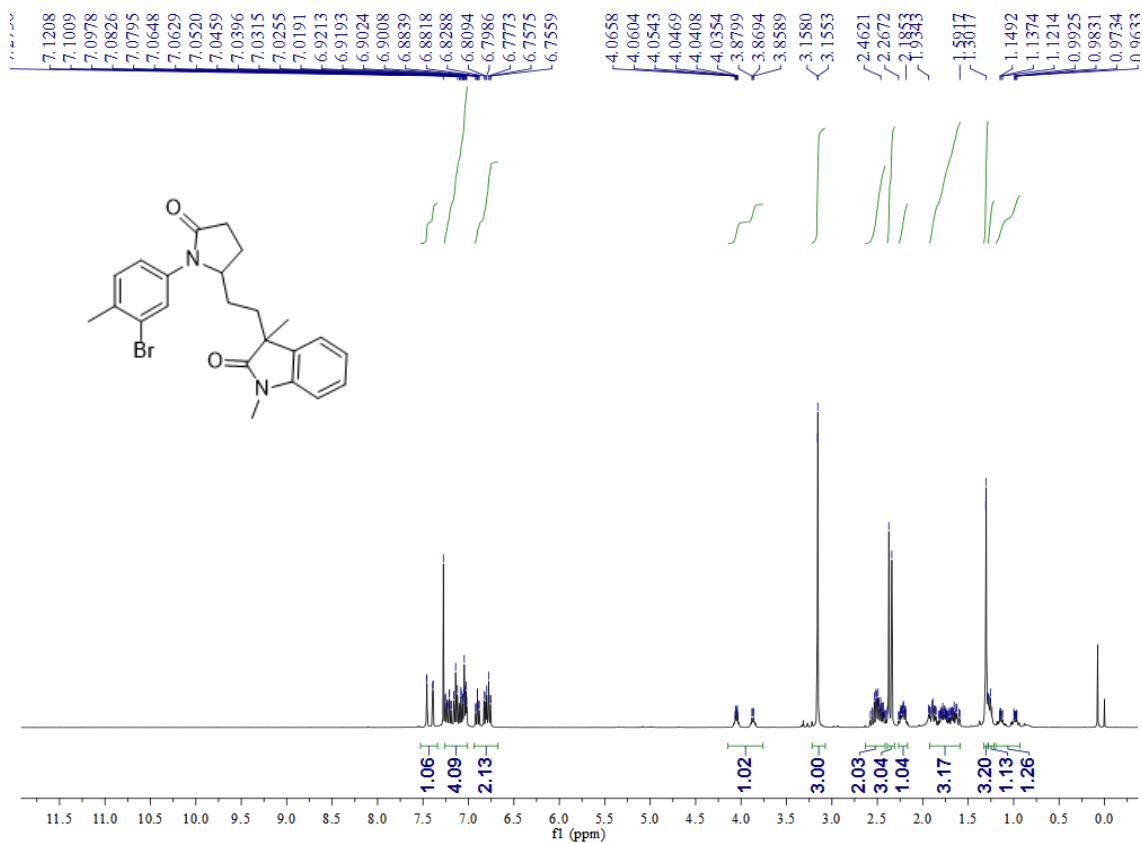

$^{13}\text{C}$  NMR (100 MHz,  $\text{CDCl}_3$ )

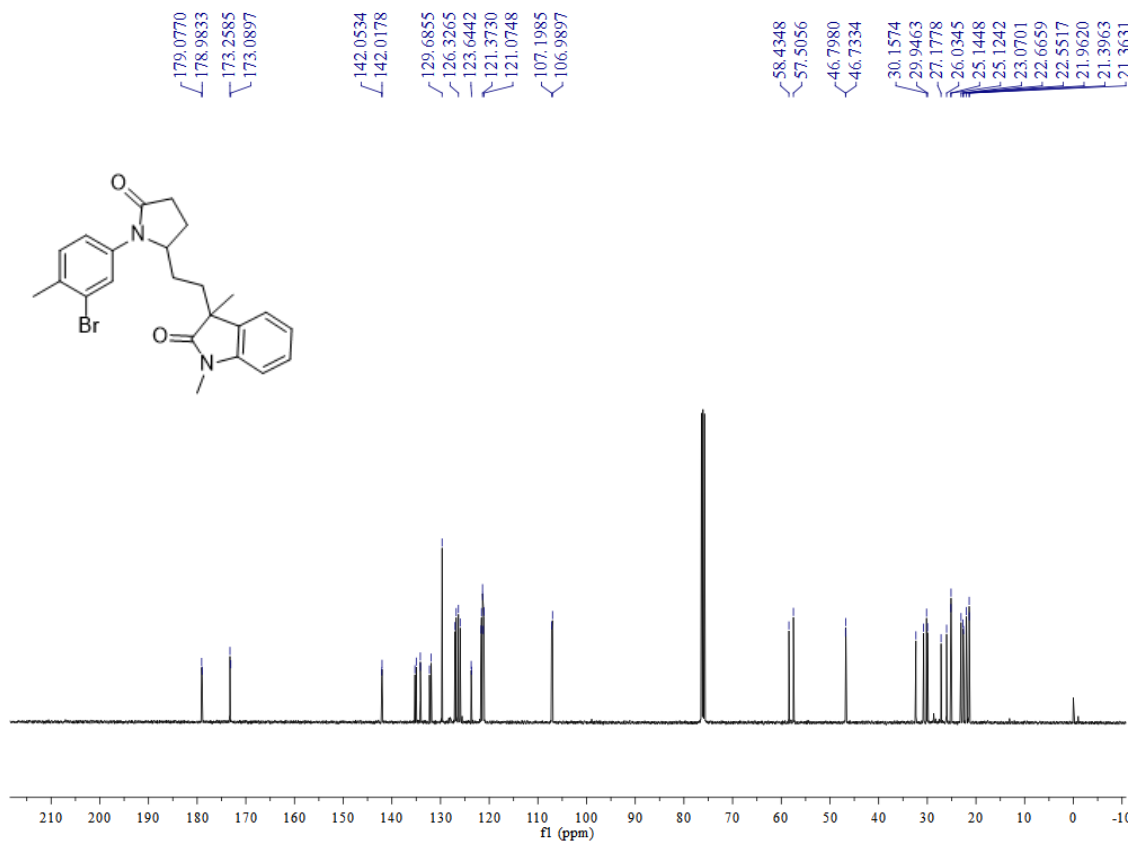

3-(2-(1-(2,4-dimethylphenyl)-5-oxopyrrolidin-2-yl)ethyl)-1,3-dimethylindolin-2-one (3qa)

$^1\text{H}$  NMR (400 MHz,  $\text{CDCl}_3$ )

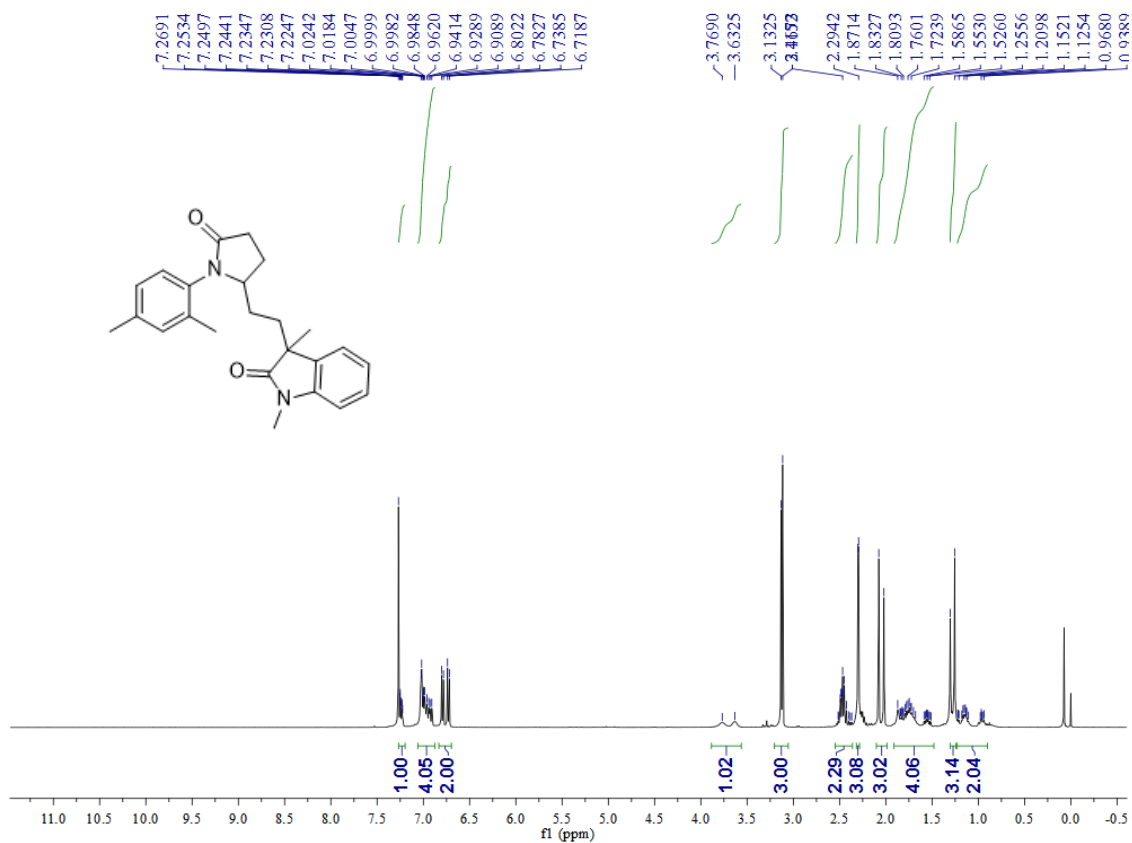

$^{13}\text{C}$  NMR (100 MHz,  $\text{CDCl}_3$ )

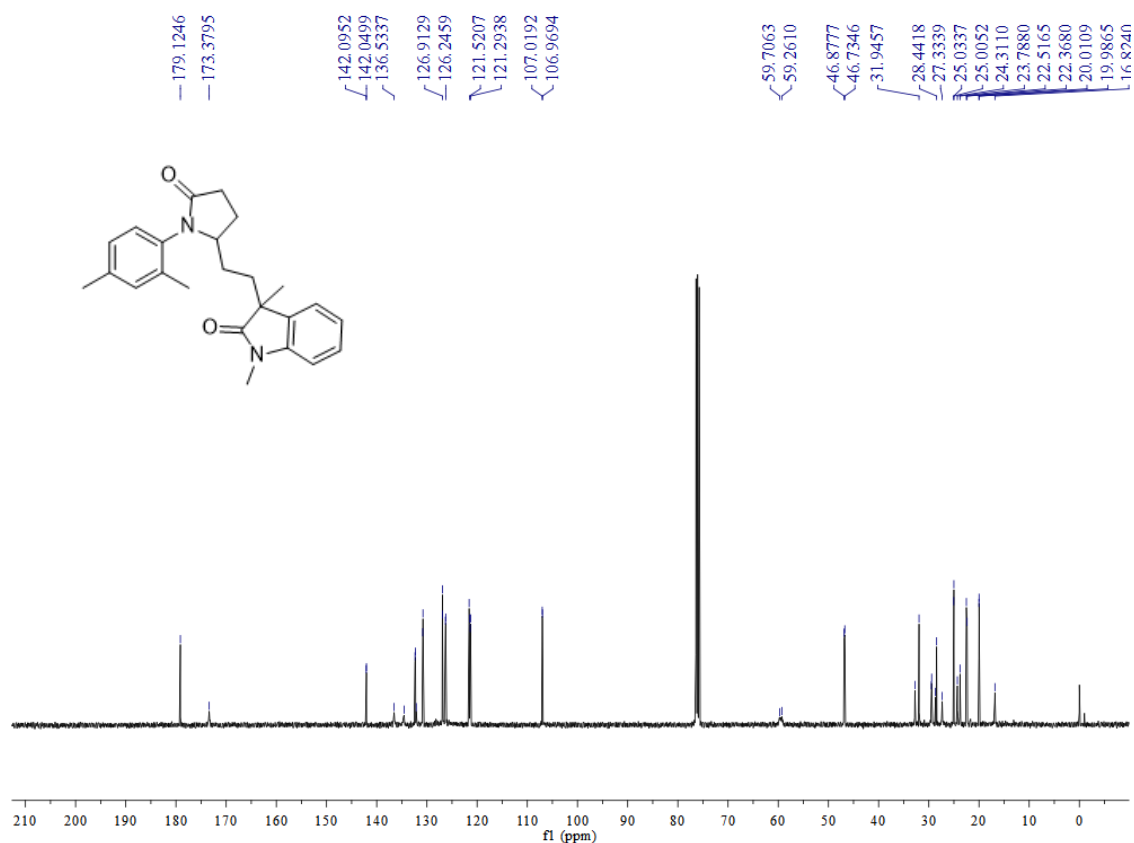

3-(2-(1-(3,5-dimethylphenyl)-5-oxopyrrolidin-2-yl)ethyl)-1,3-dimethylindolin-2-one (3ra)

$^1\text{H}$  NMR (400 MHz,  $\text{CDCl}_3$ )

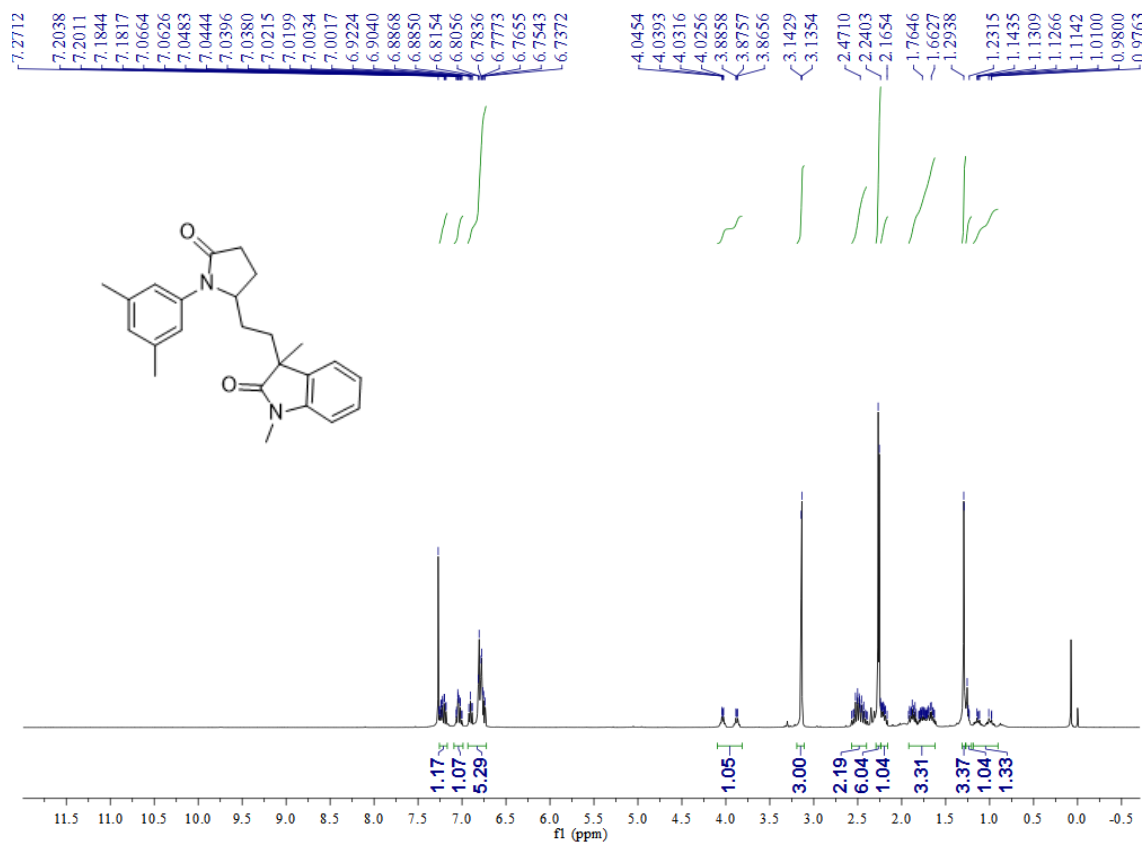



$^{13}\text{C}$  NMR (100 MHz,  $\text{CDCl}_3$ )

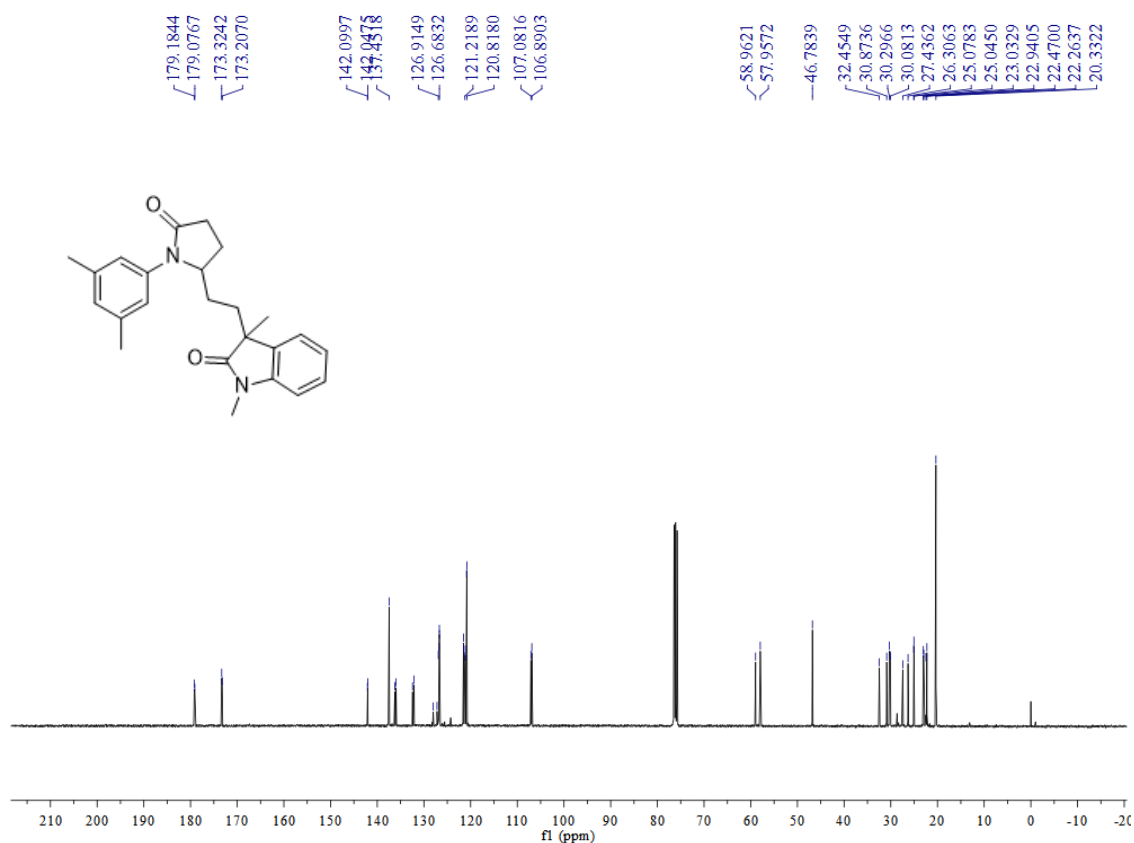

3-(2-(1-mesityl-5-oxopyrrolidin-2-yl)ethyl)-1,3-dimethylindolin-2-one (3sa)

$^1\text{H}$  NMR (400 MHz,  $\text{CDCl}_3$ )

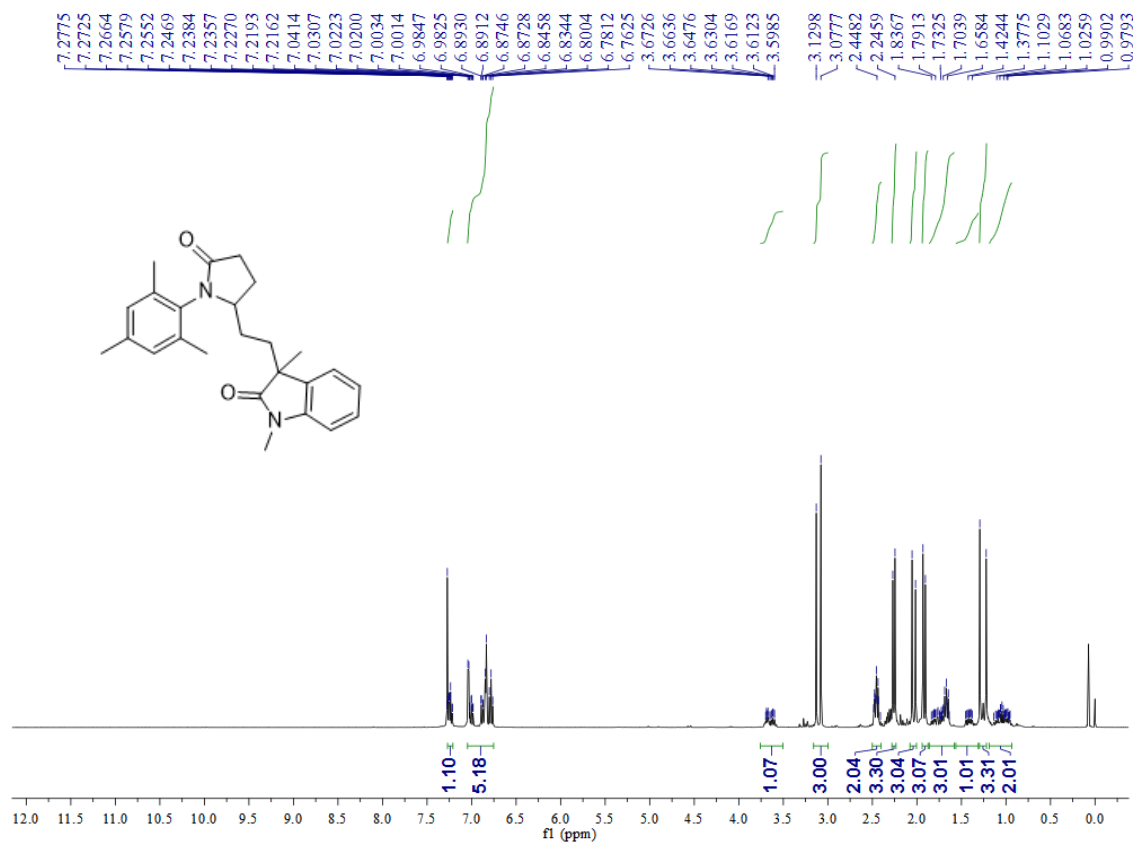

$^{13}\text{C}$  NMR (100 MHz,  $\text{CDCl}_3$ )

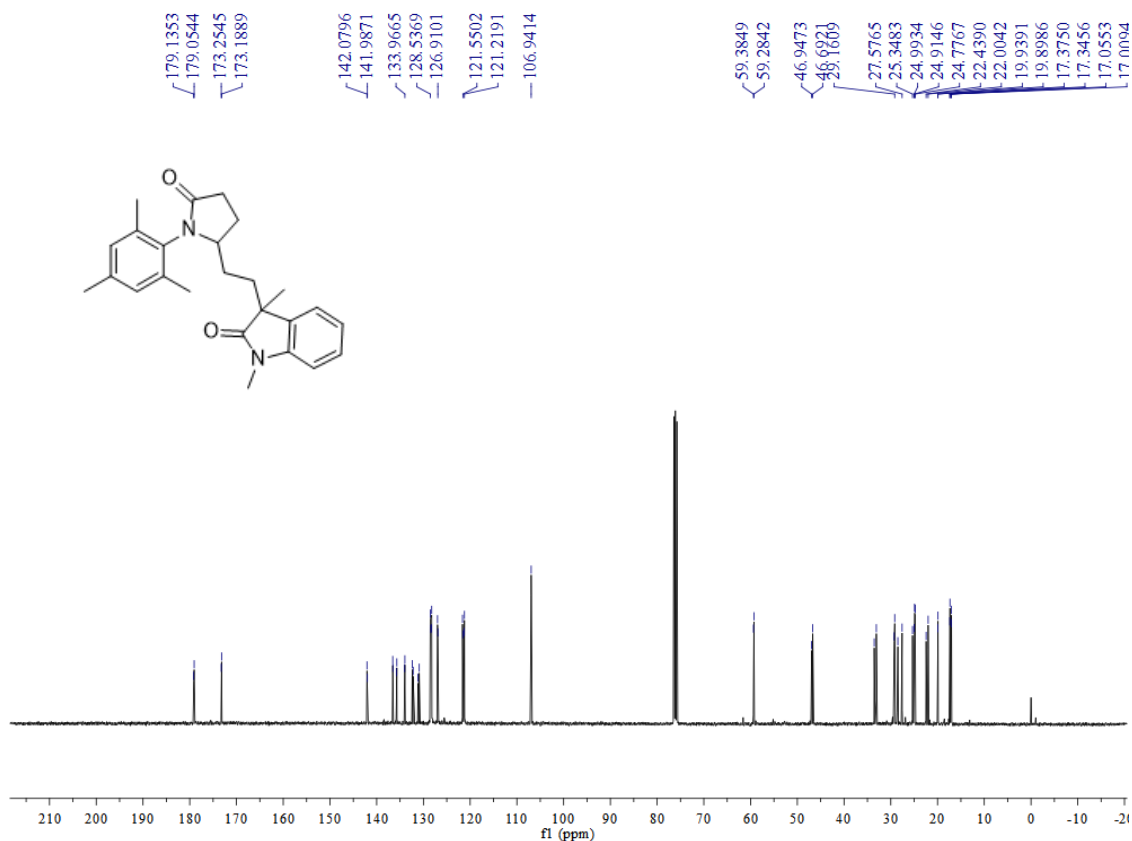

### 1,3-dimethyl-3-(2-(4-methyl-5-oxo-1-phenylpyrrolidin-2-yl)ethyl)indolin-2-one (3ta)

First diastereomer mixture

$^1\text{H}$  NMR of first diastereomer mixture of 3ta (400 MHz,  $\text{CDCl}_3$ )

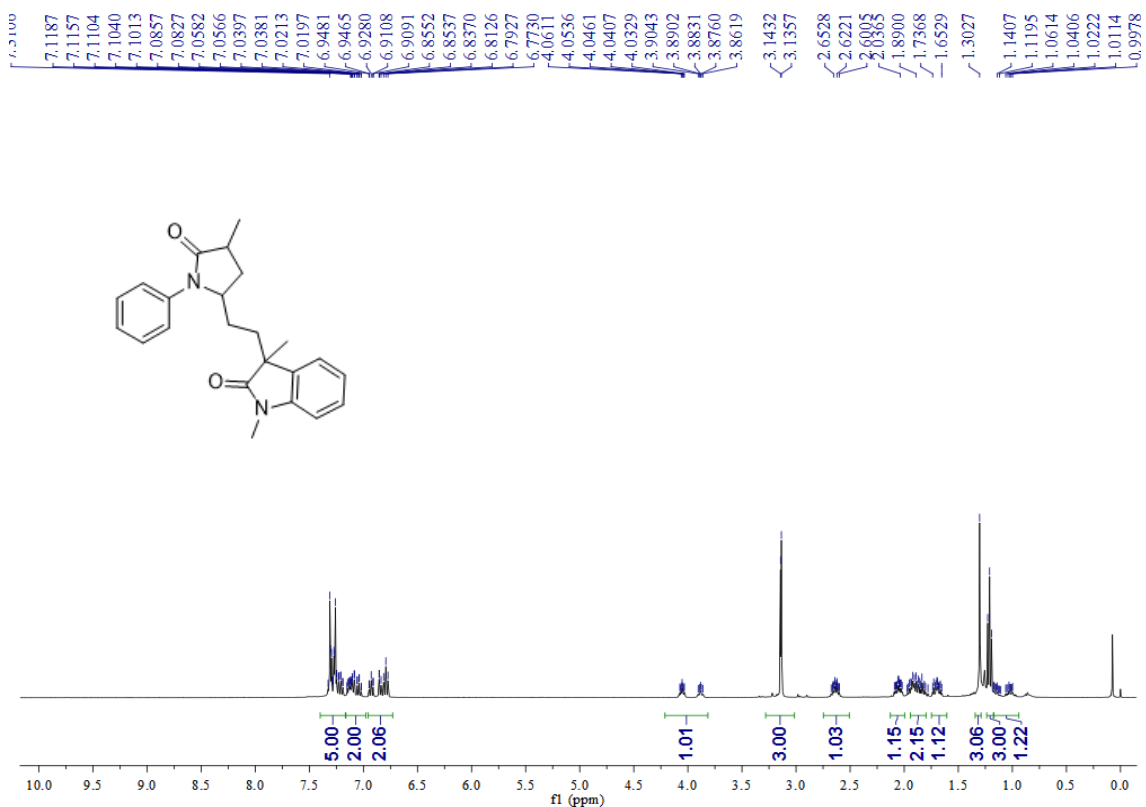

<sup>13</sup>C NMR of first diastereomer mixture of 3ta (100 MHz, CDCl<sub>3</sub>)

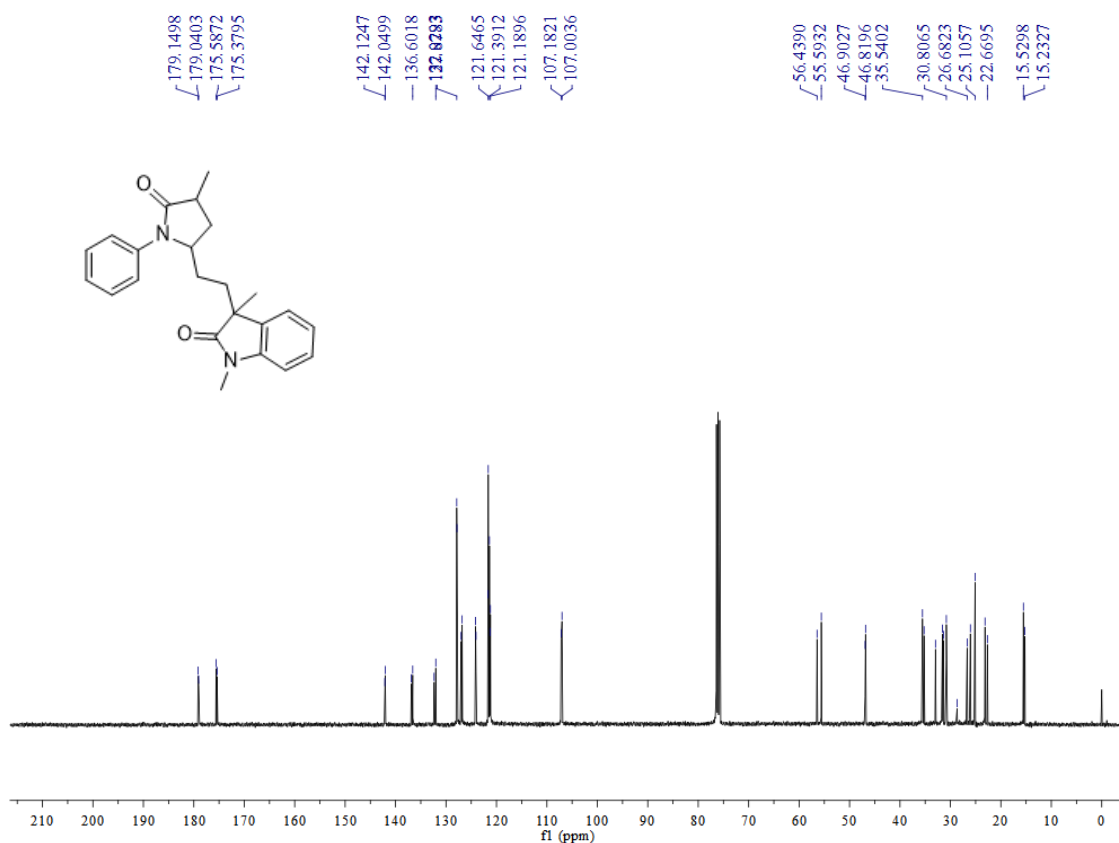

Second diastereomer mixture

<sup>1</sup>H NMR of second diastereomer mixture of 3ta (400 MHz, CDCl<sub>3</sub>)

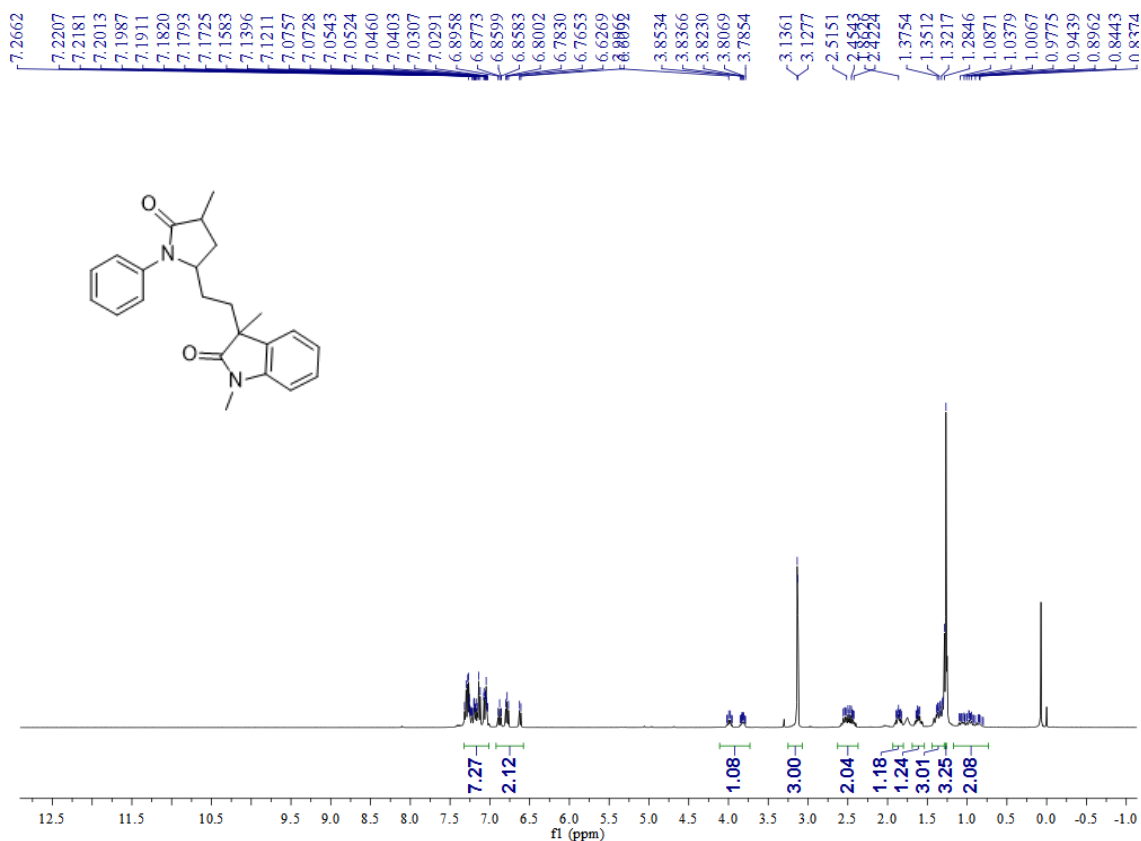

<sup>13</sup>C NMR of second diastereomer mixture of 3ta (400 MHz, CDCl<sub>3</sub>)

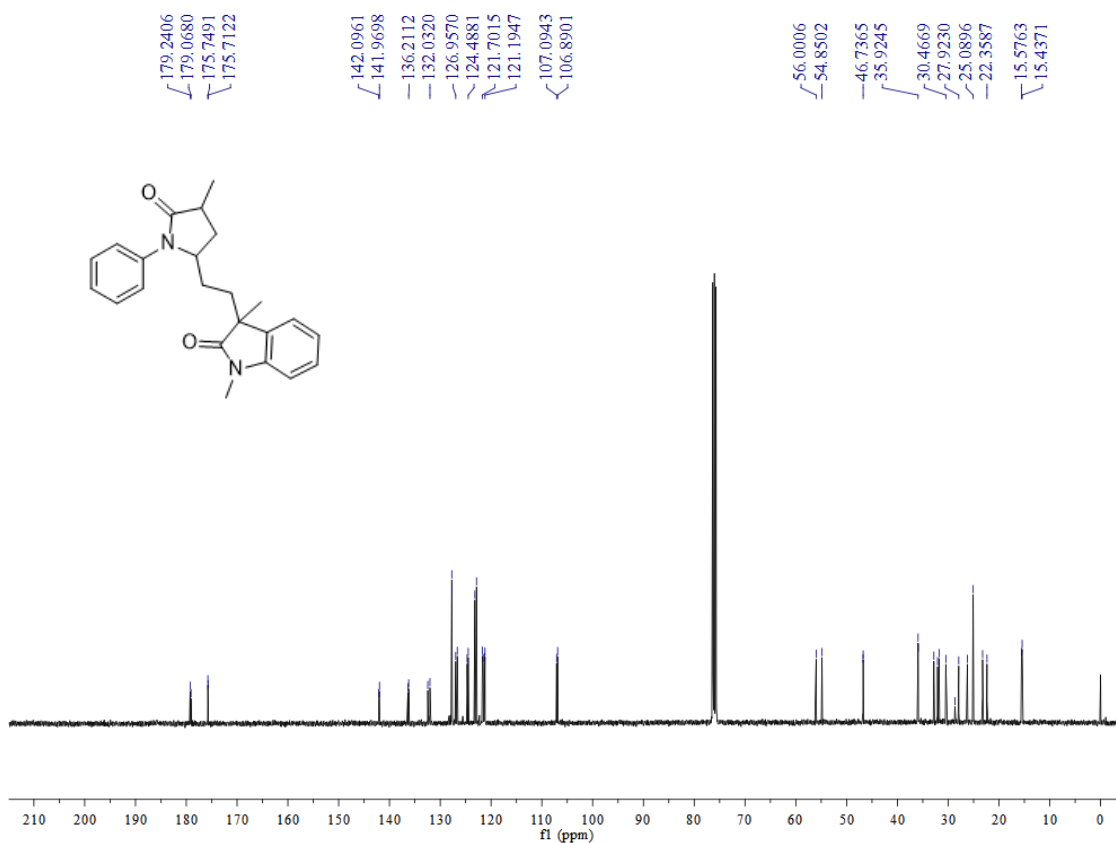

4-(2-(1,3-dimethyl-2-oxindolin-3-yl)ethyl)-3-phenyloxazolidin-2-one (3ua)

<sup>1</sup>H NMR (400 MHz, CDCl<sub>3</sub>)

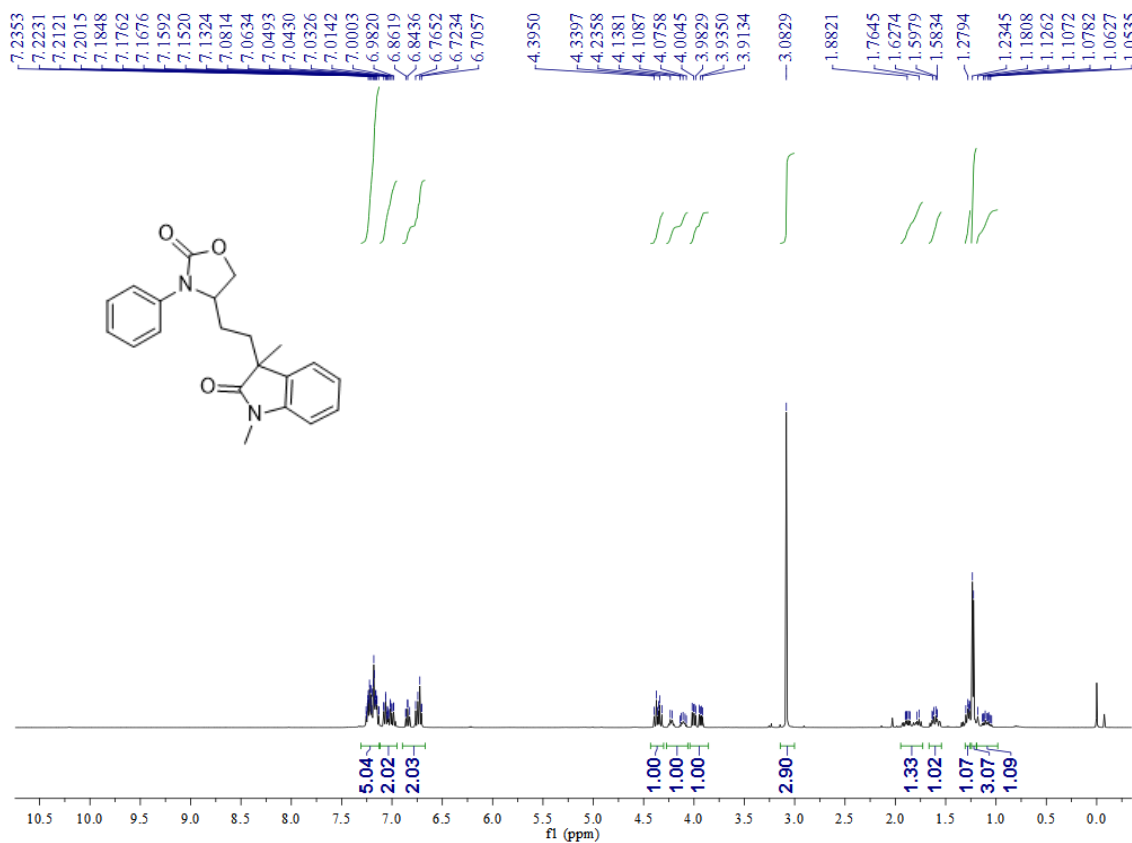

$^{13}\text{C}$  NMR (100 MHz,  $\text{CDCl}_3$ )

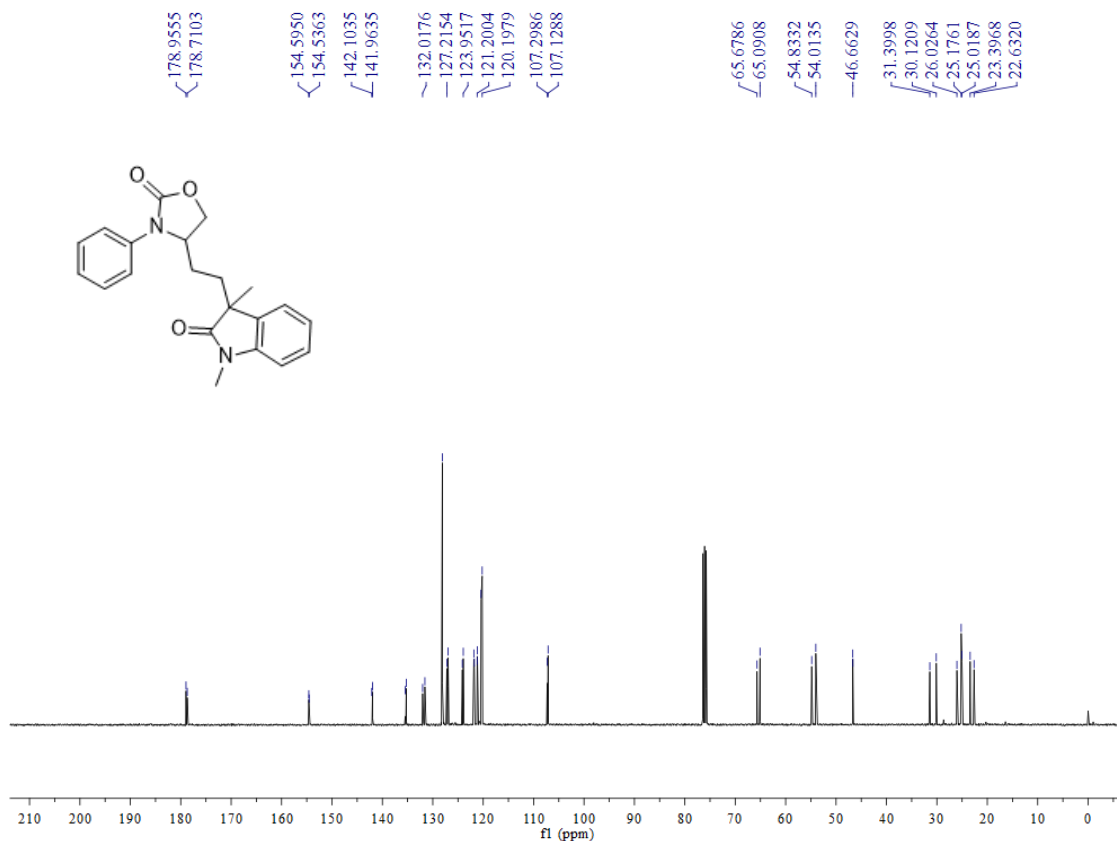

**1,3,5-trimethyl-3-(2-(5-oxo-1-phenylpyrrolidin-2-yl)ethyl)indolin-2-one (3ab)**

$^1\text{H}$  NMR (400 MHz,  $\text{CDCl}_3$ )

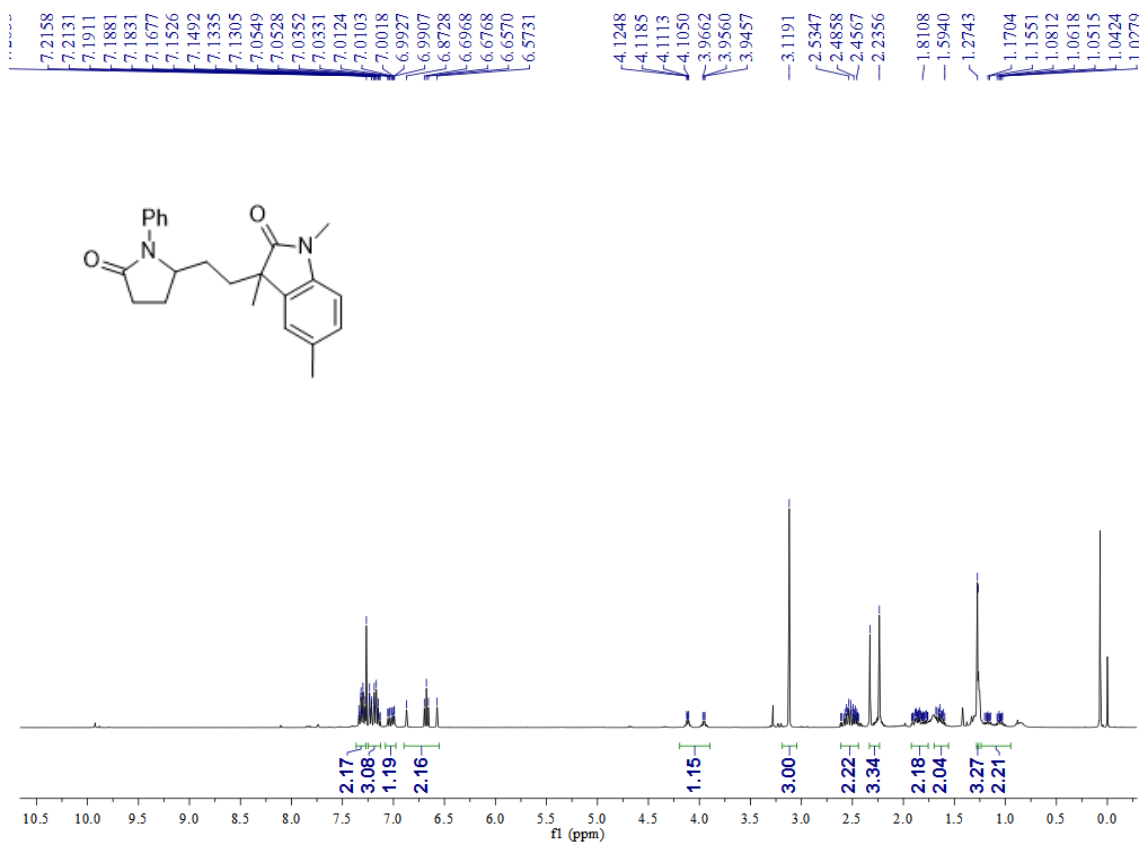

$^{13}\text{C}$  NMR (100 MHz,  $\text{CDCl}_3$ )

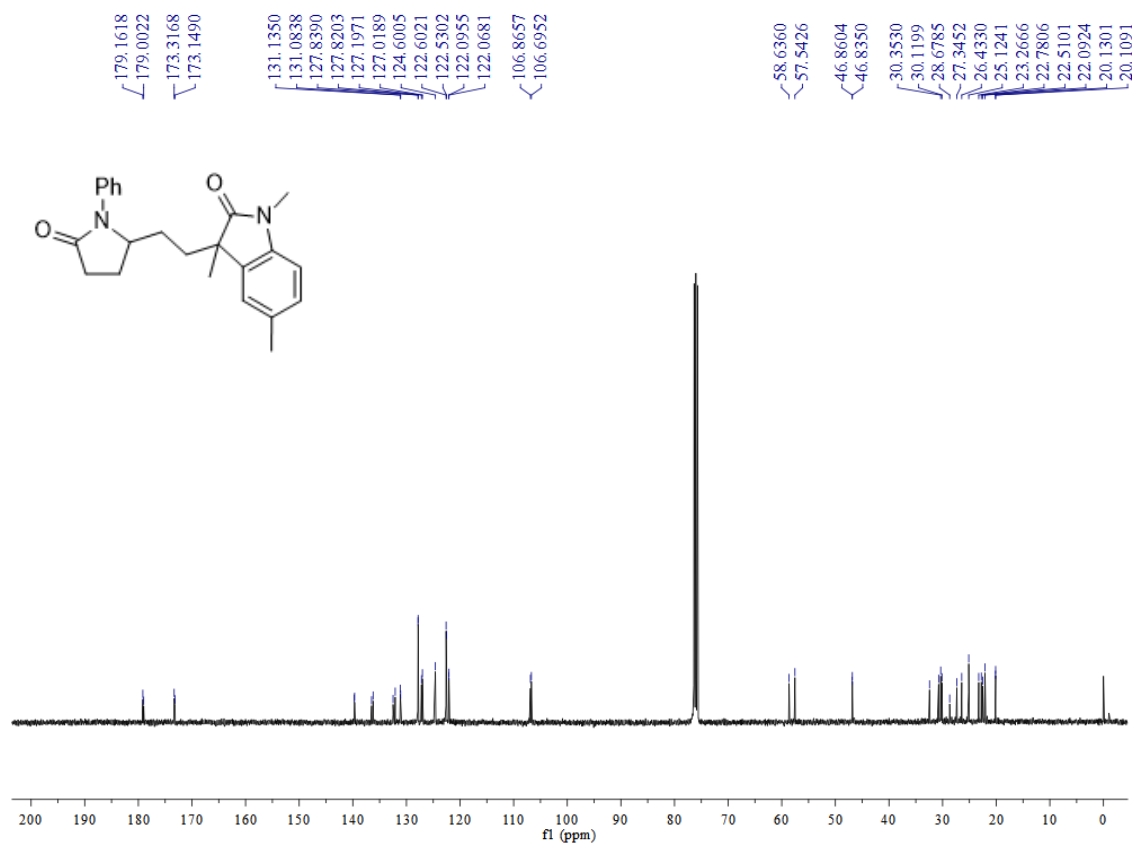

**5-fluoro-1,3-dimethyl-3-(2-(5-oxo-1-phenylpyrrolidin-2-yl)ethyl)indolin-2-one (3ac)**

$^1\text{H}$  NMR (400 MHz,  $\text{CDCl}_3$ )

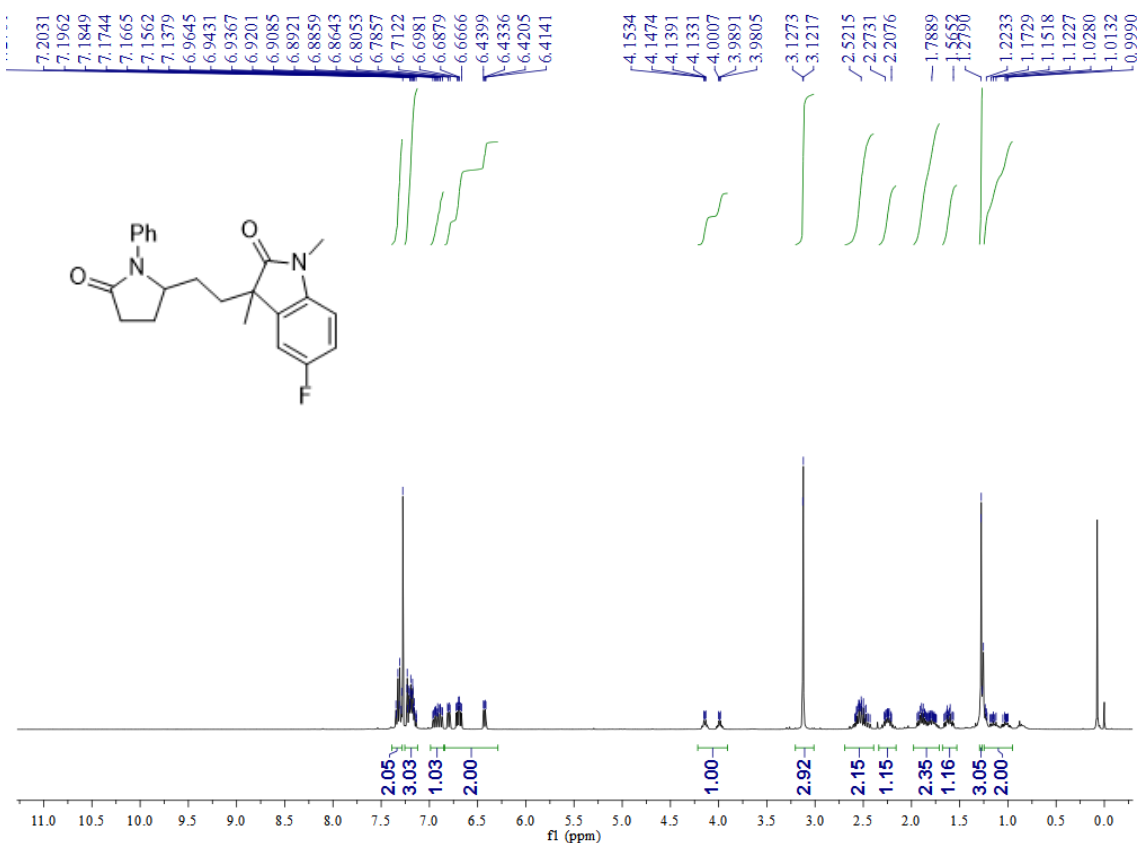

<sup>13</sup>C NMR (100 MHz, CDCl<sub>3</sub>)

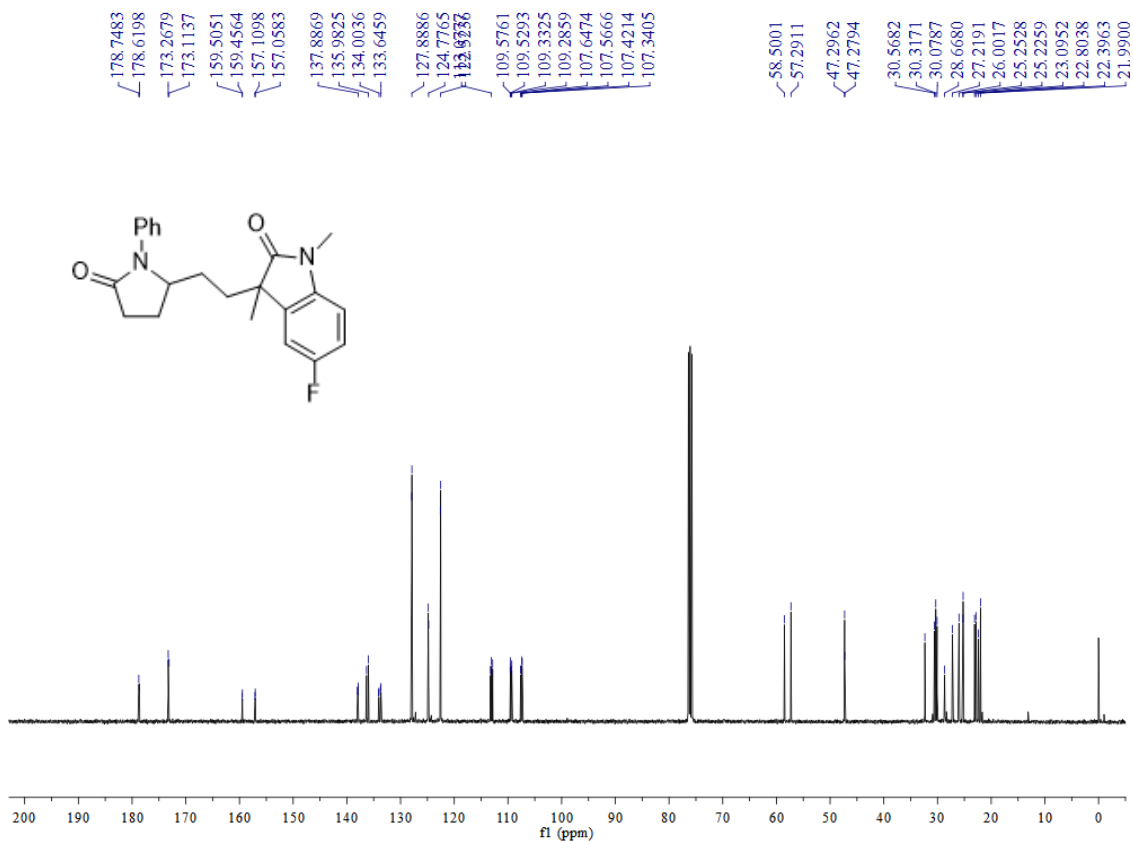

<sup>19</sup>F NMR (376 MHz, CDCl<sub>3</sub>)

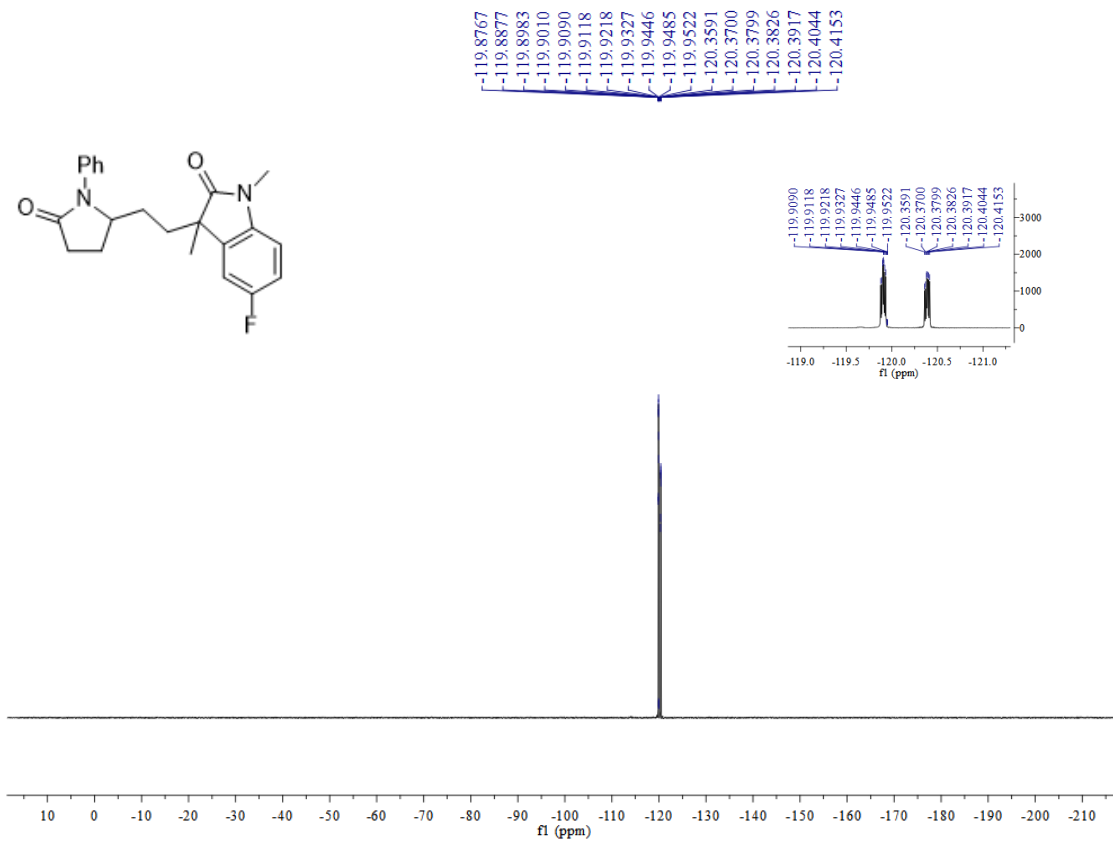

### 5-chloro-1,3-dimethyl-3-(2-(5-oxo-1-phenylpyrrolidin-2-yl)ethyl)indolin-2-one (3ad)

$^1\text{H}$  NMR (400 MHz,  $\text{CDCl}_3$ )

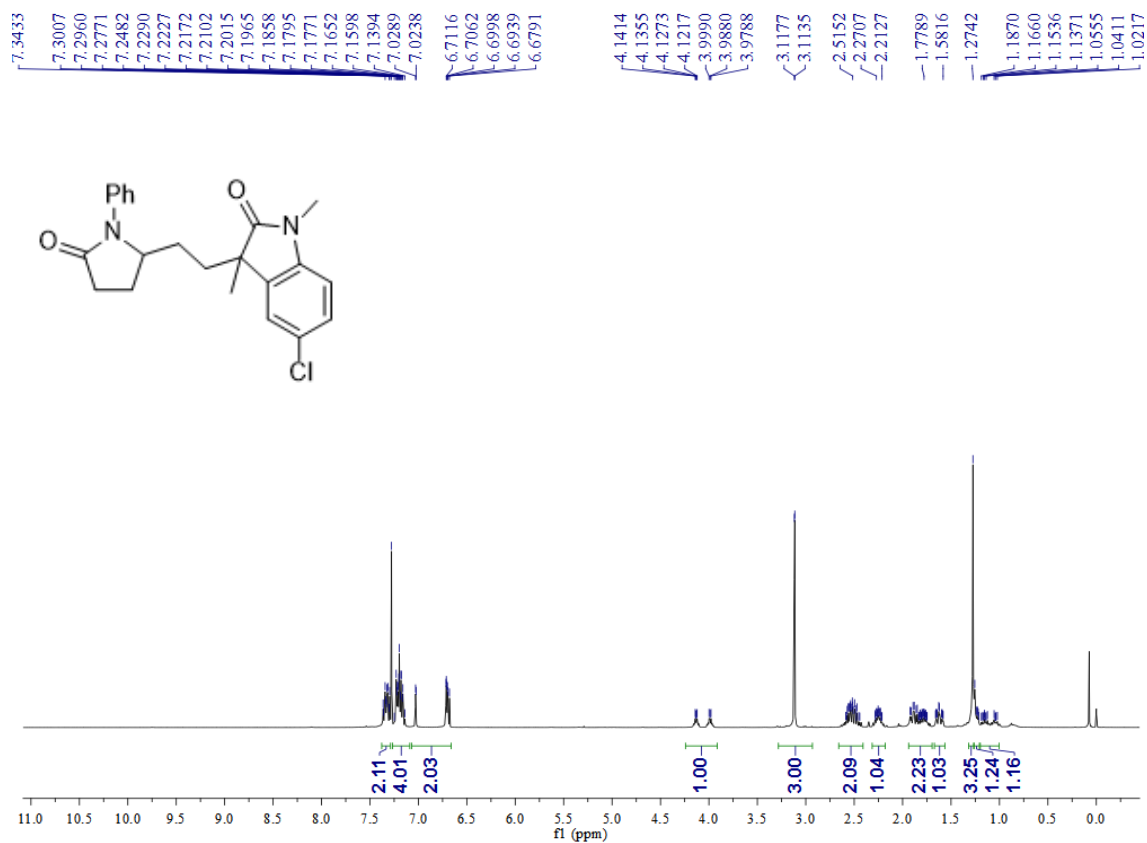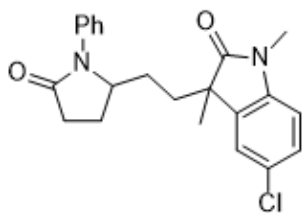

$^{13}\text{C}$  NMR (100 MHz,  $\text{CDCl}_3$ )

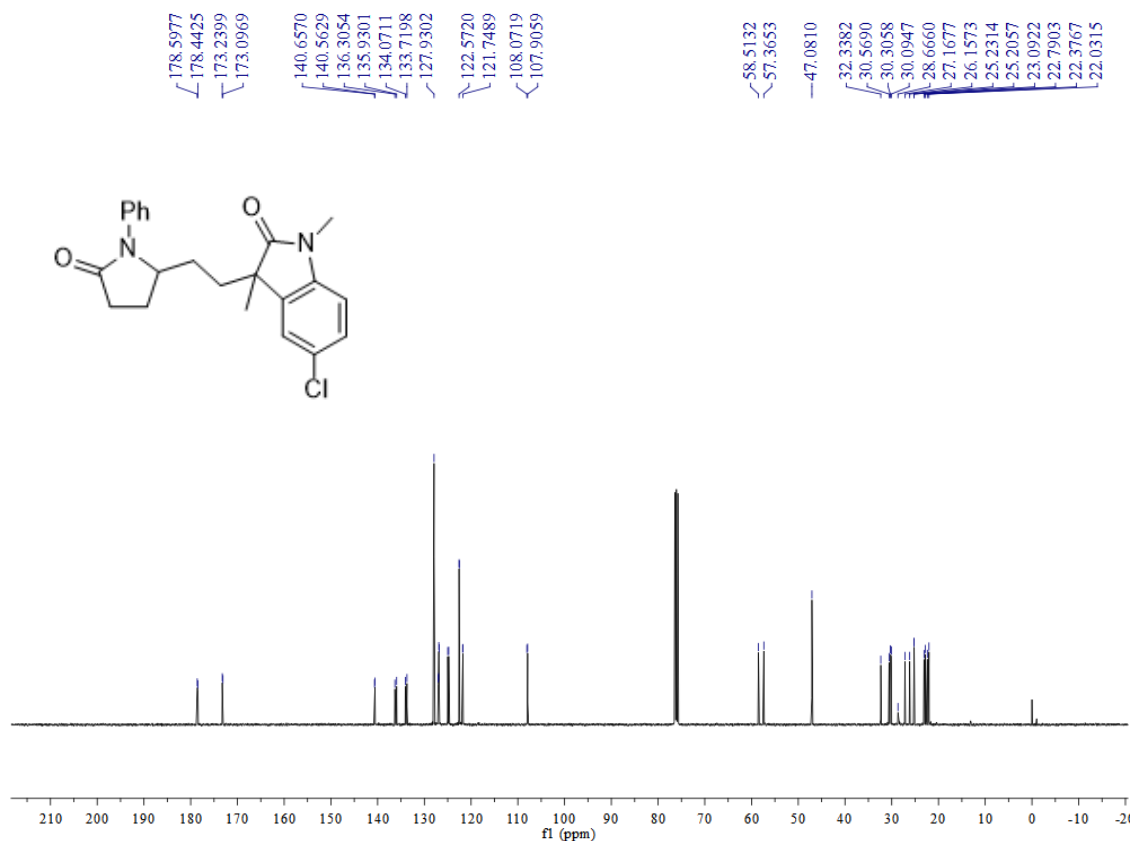



### 5-bromo-1,3-dimethyl-3-(2-(5-oxo-1-phenylpyrrolidin-2-yl)ethyl)indolin-2-one (3ae)

<sup>1</sup>H NMR (400 MHz, CDCl<sub>3</sub>)

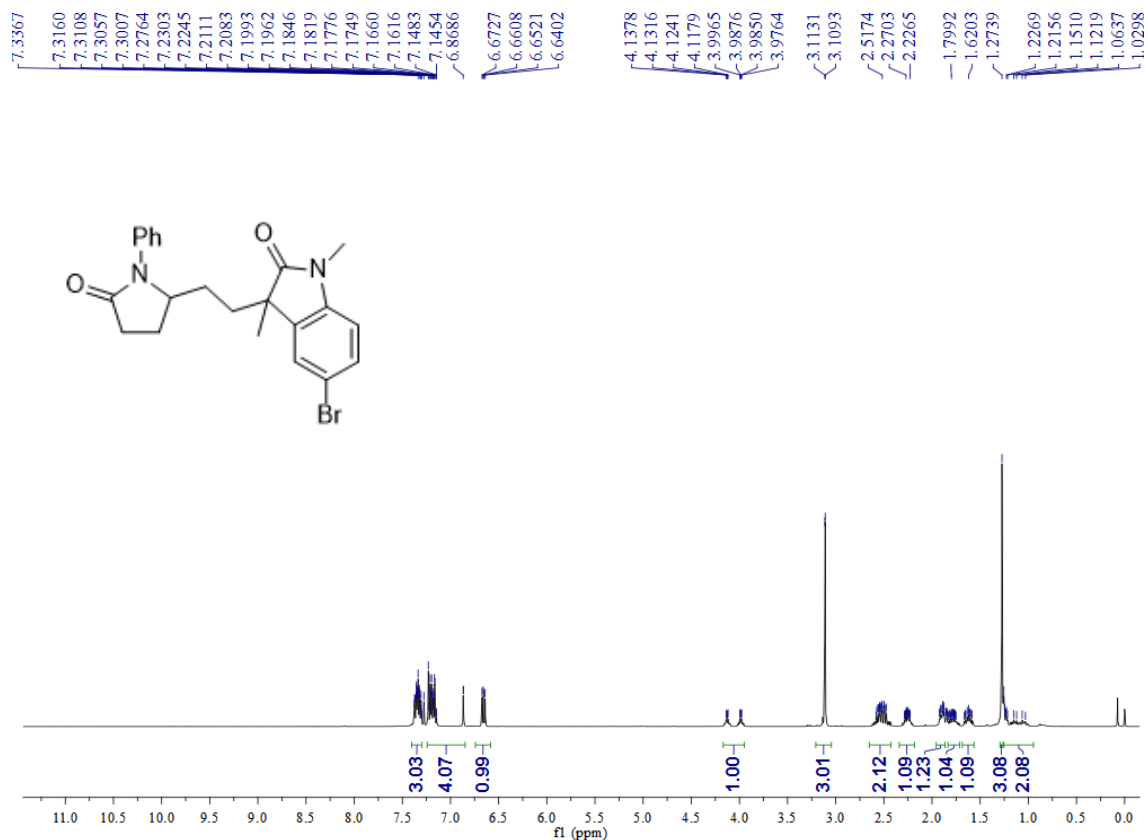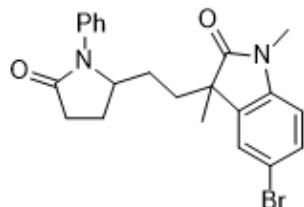

<sup>13</sup>C NMR (100 MHz, CDCl<sub>3</sub>)

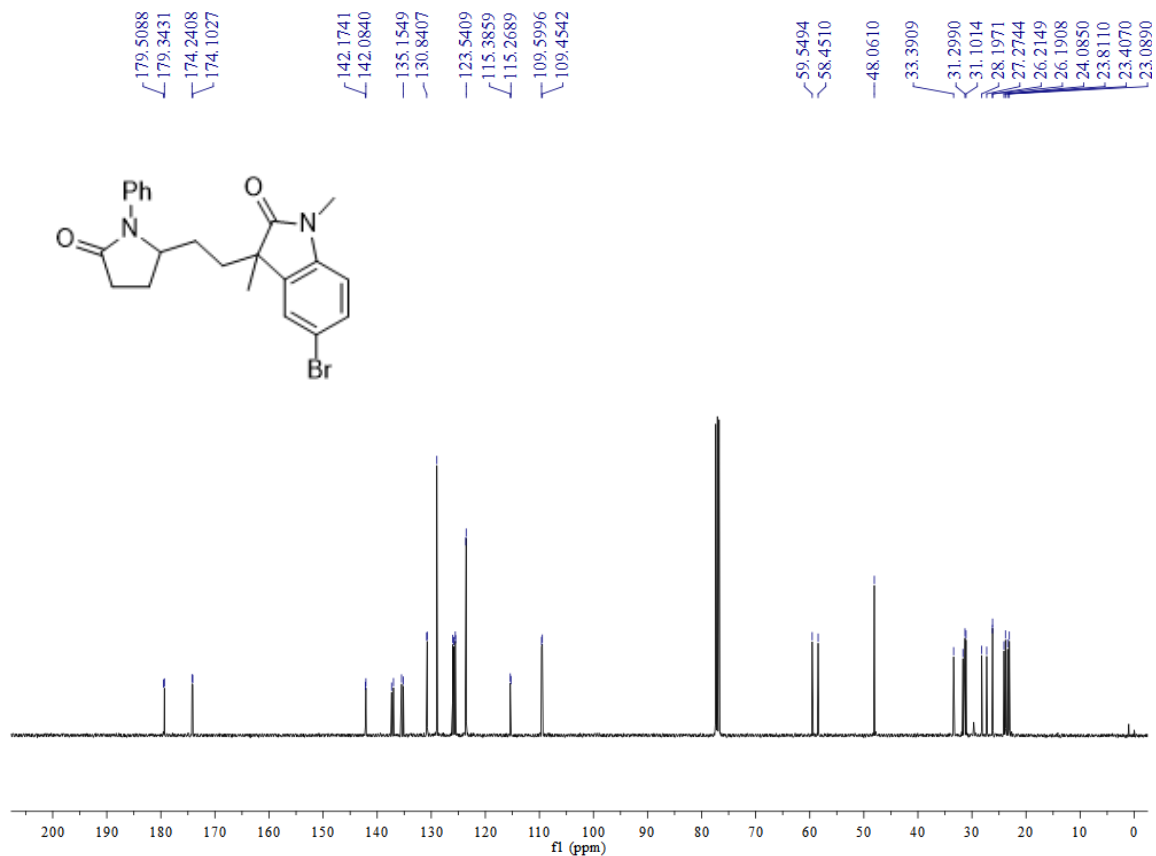

# Methyl 1,3-dimethyl-2-oxo-3-(2-(5-oxo-1-phenylpyrrolidin-2-yl)ethyl)indoline-5-carboxylate (3af)

$^1\text{H}$  NMR (400 MHz,  $\text{CDCl}_3$ )

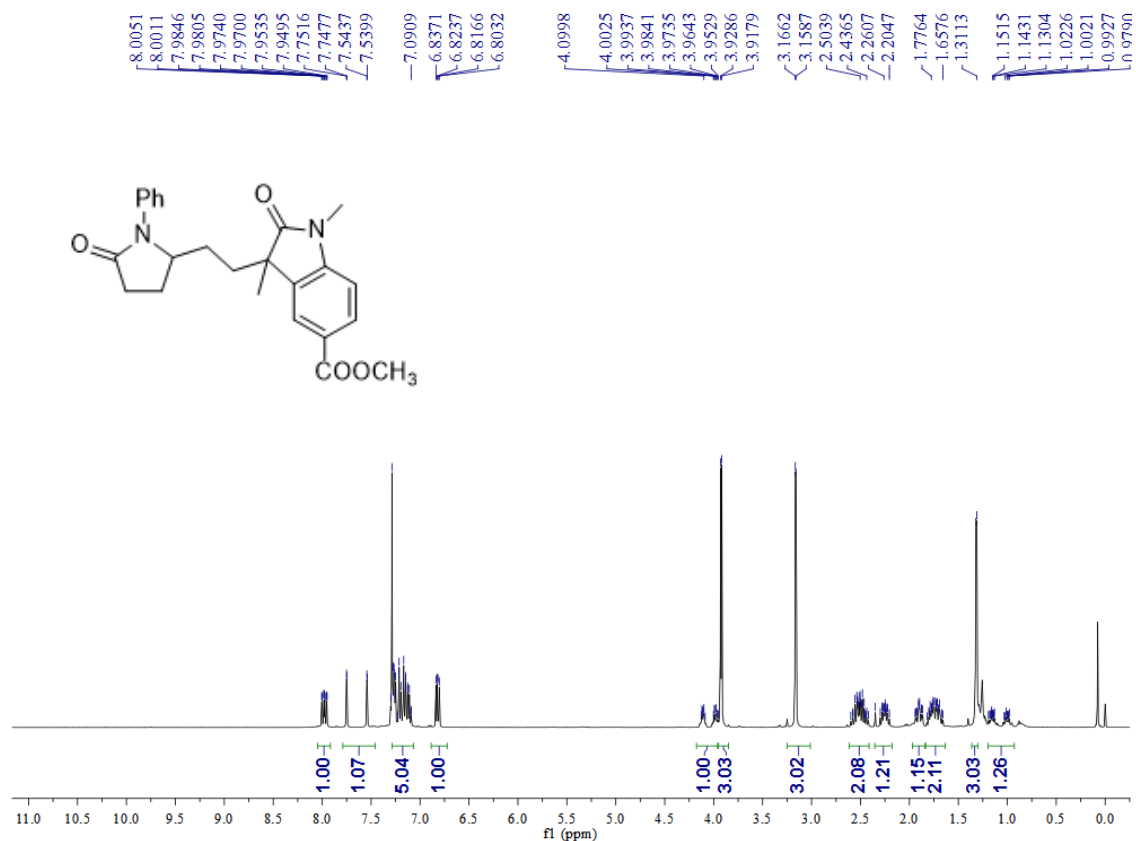

$^{13}\text{C}$  NMR (100 MHz,  $\text{CDCl}_3$ )

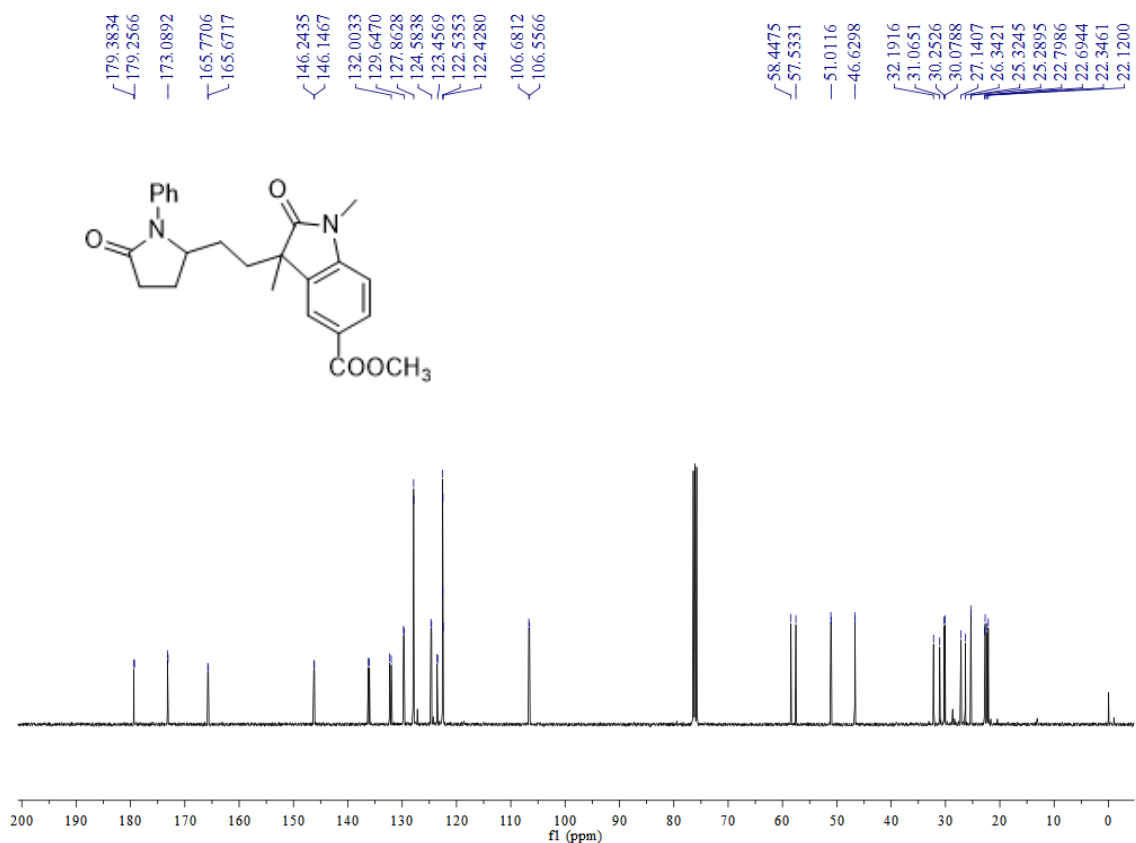

### 1,3-dimethyl-3-(2-(5-oxo-1-phenylpyrrolidin-2-yl)ethyl)-5-(trifluoromethyl)indolin-2-one (3ag)

$^1\text{H}$  NMR (400 MHz,  $\text{CDCl}_3$ )

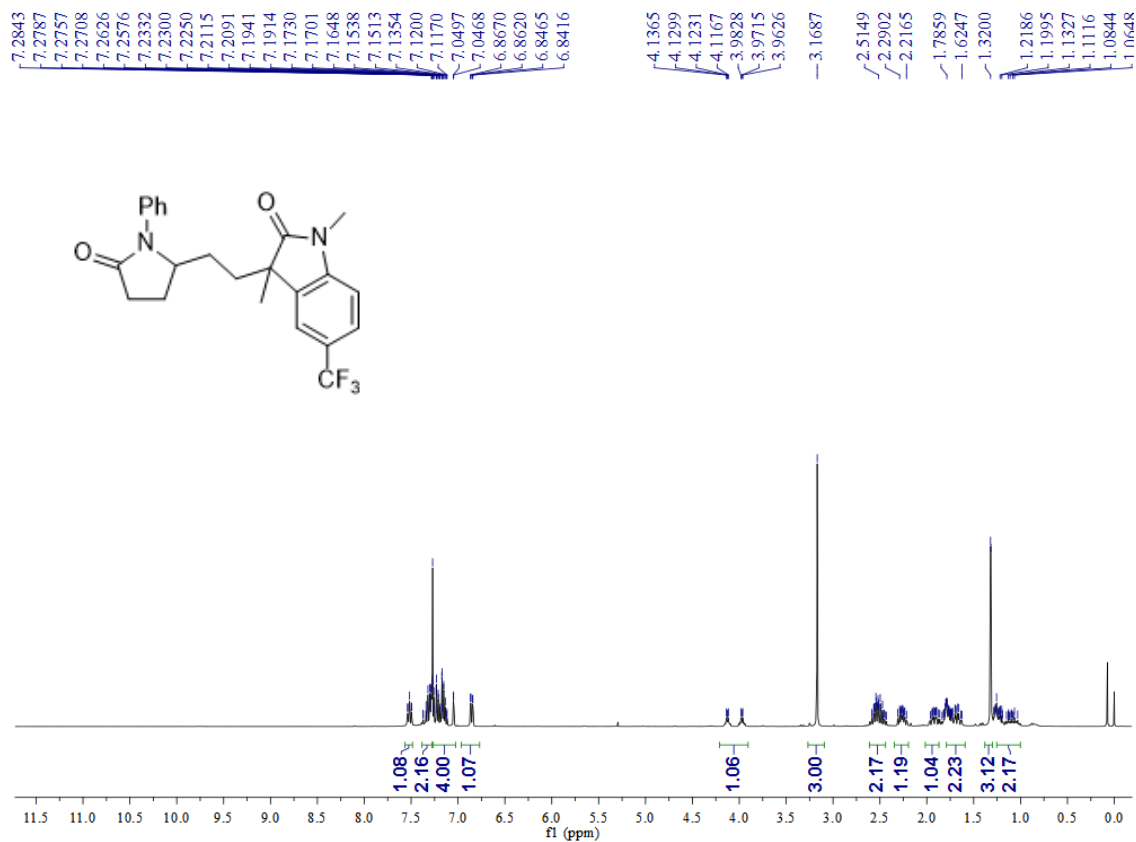

$^{13}\text{C}$  NMR (100 MHz,  $\text{CDCl}_3$ )

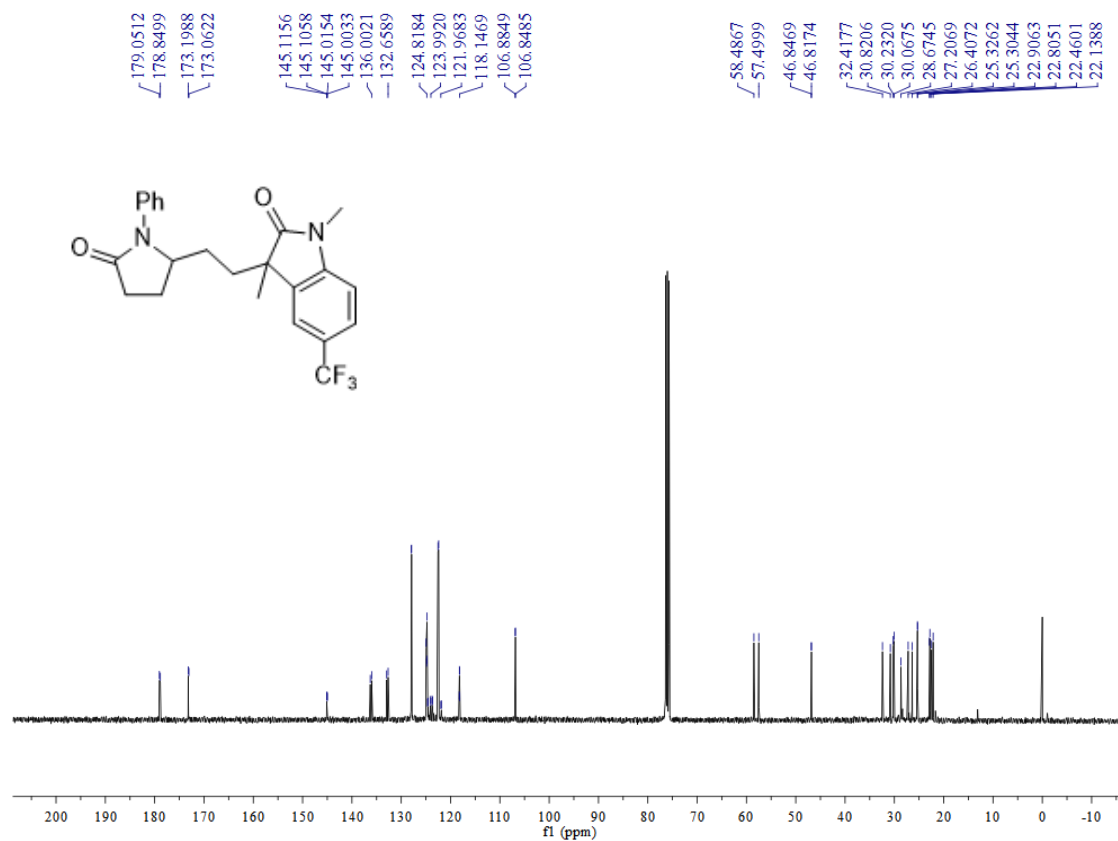

$^{19}\text{F}$  NMR (376 MHz,  $\text{CDCl}_3$ )

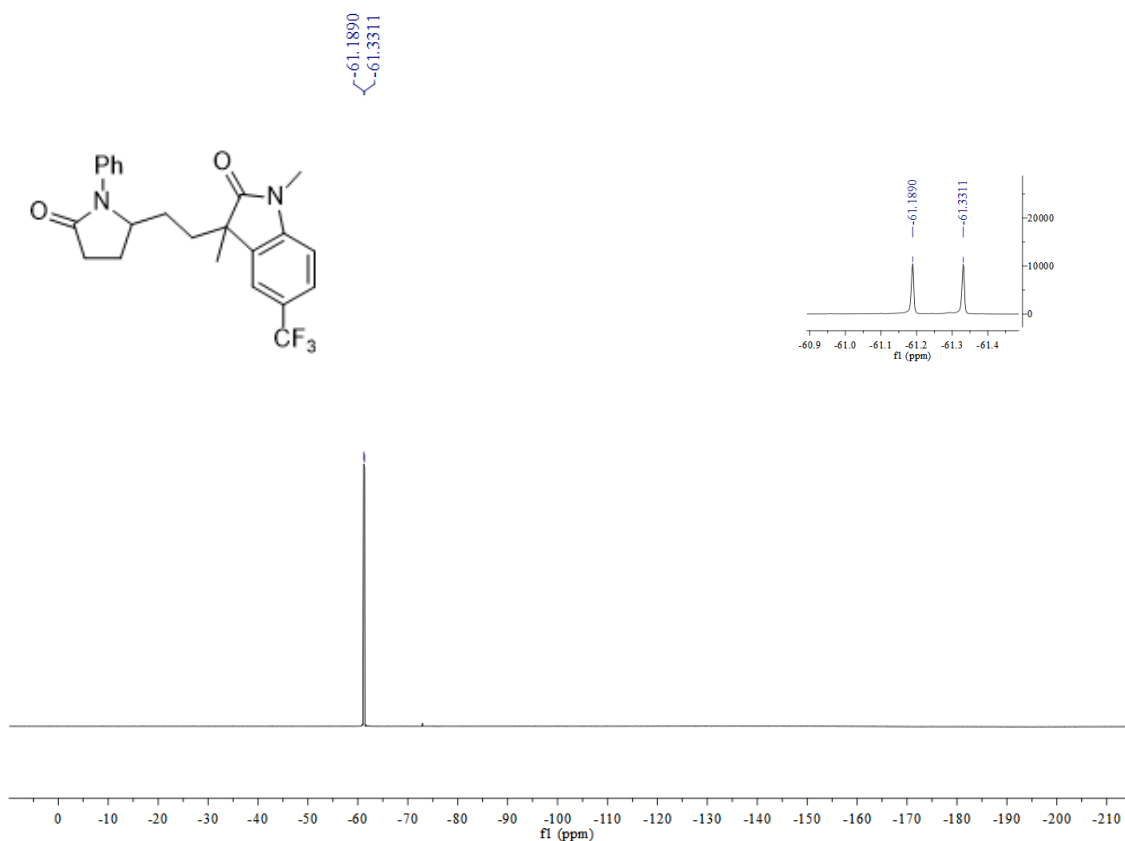

**1,3-dimethyl-2-oxo-3-(2-(5-oxo-1-phenylpyrrolidin-2-yl)ethyl)indoline-5-carbonitrile (3a)**

$^1\text{H}$  NMR (400 MHz,  $\text{CDCl}_3$ )

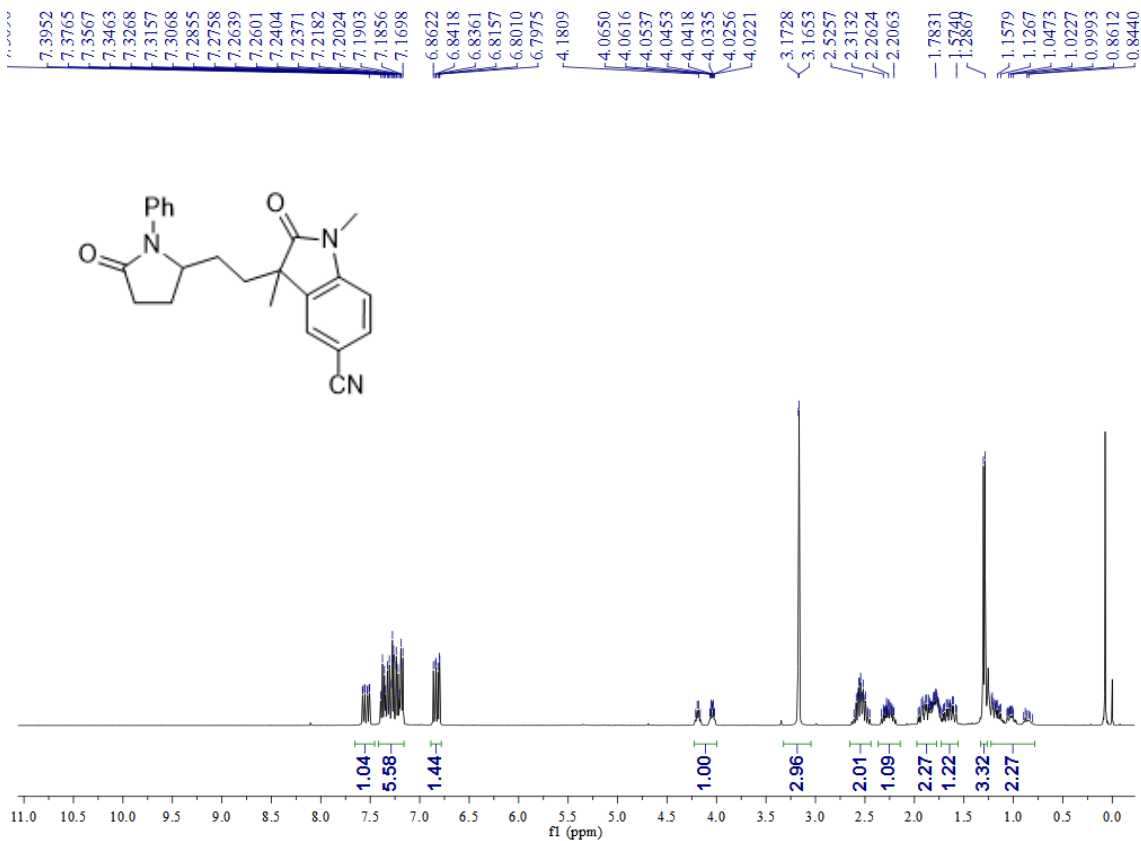

$^{13}\text{C}$  NMR (100 MHz,  $\text{CDCl}_3$ )

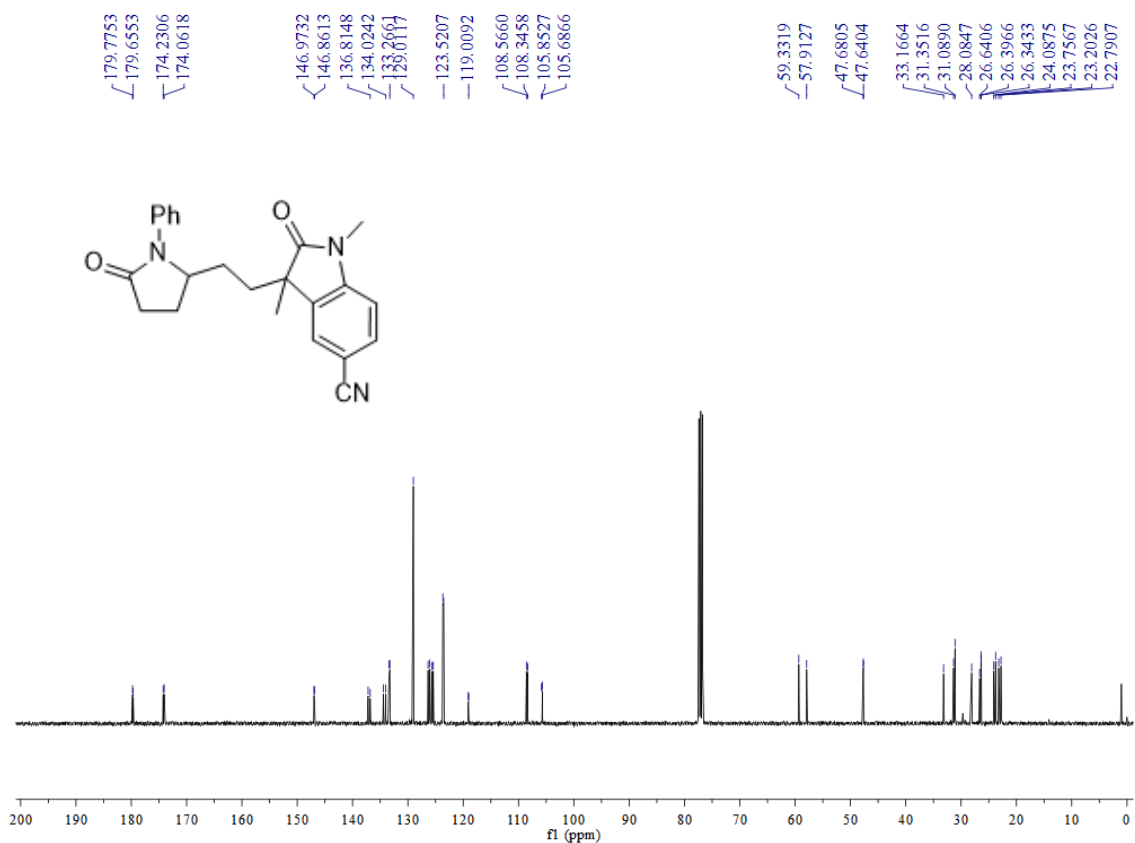

**1,3,7-trimethyl-3-(2-(5-oxo-1-phenylpyrrolidin-2-yl)ethyl)indolin-2-one (3ai)**

$^1\text{H}$  NMR (400 MHz,  $\text{CDCl}_3$ )

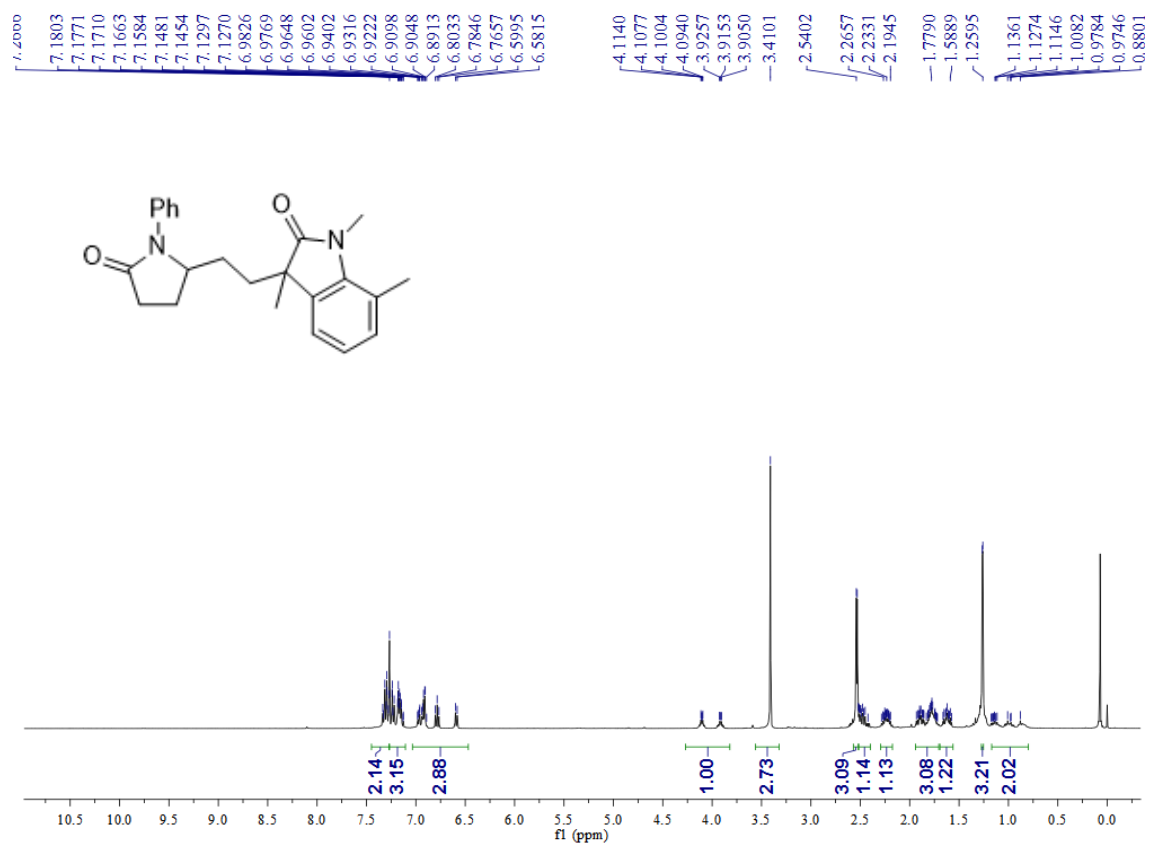

$^{13}\text{C}$  NMR (100 MHz,  $\text{CDCl}_3$ )

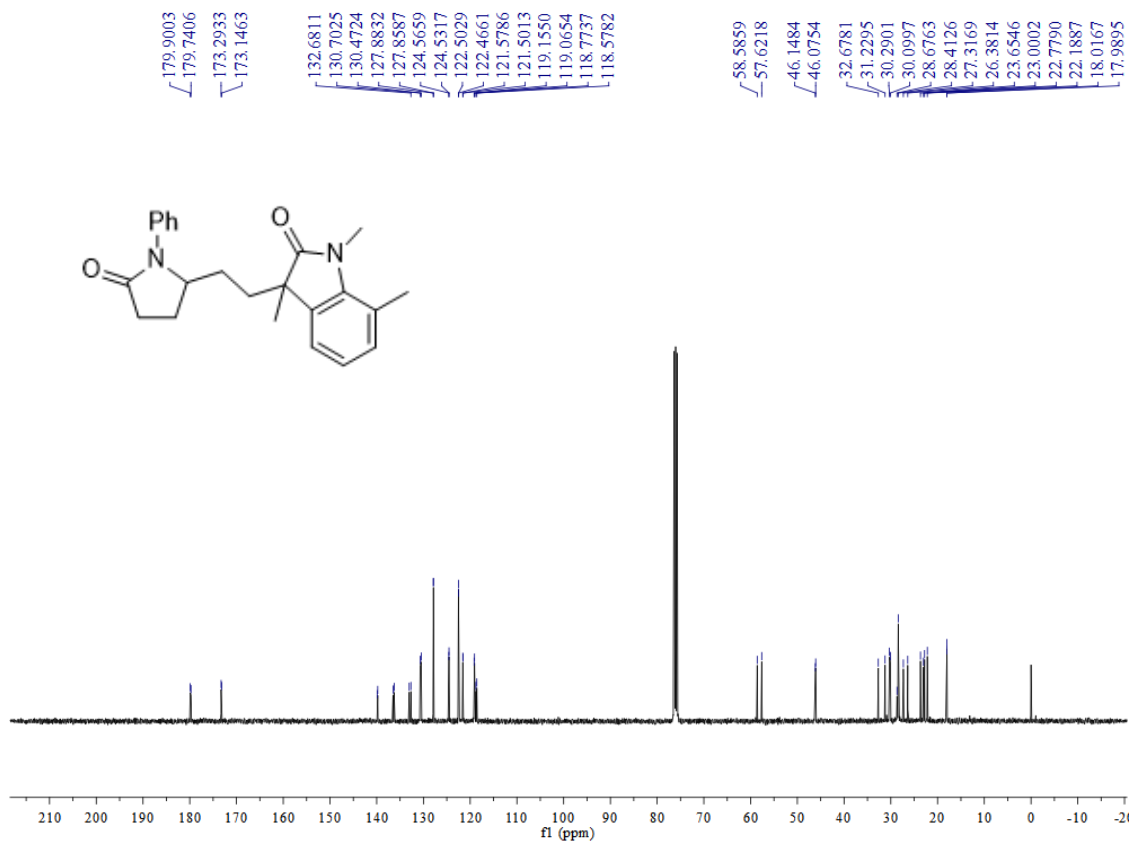

7-chloro-1,3-dimethyl-3-(2-(5-oxo-1-phenylpyrrolidin-2-yl)ethyl)indolin-2-one (3aj)

$^1\text{H}$  NMR (400 MHz,  $\text{CDCl}_3$ )

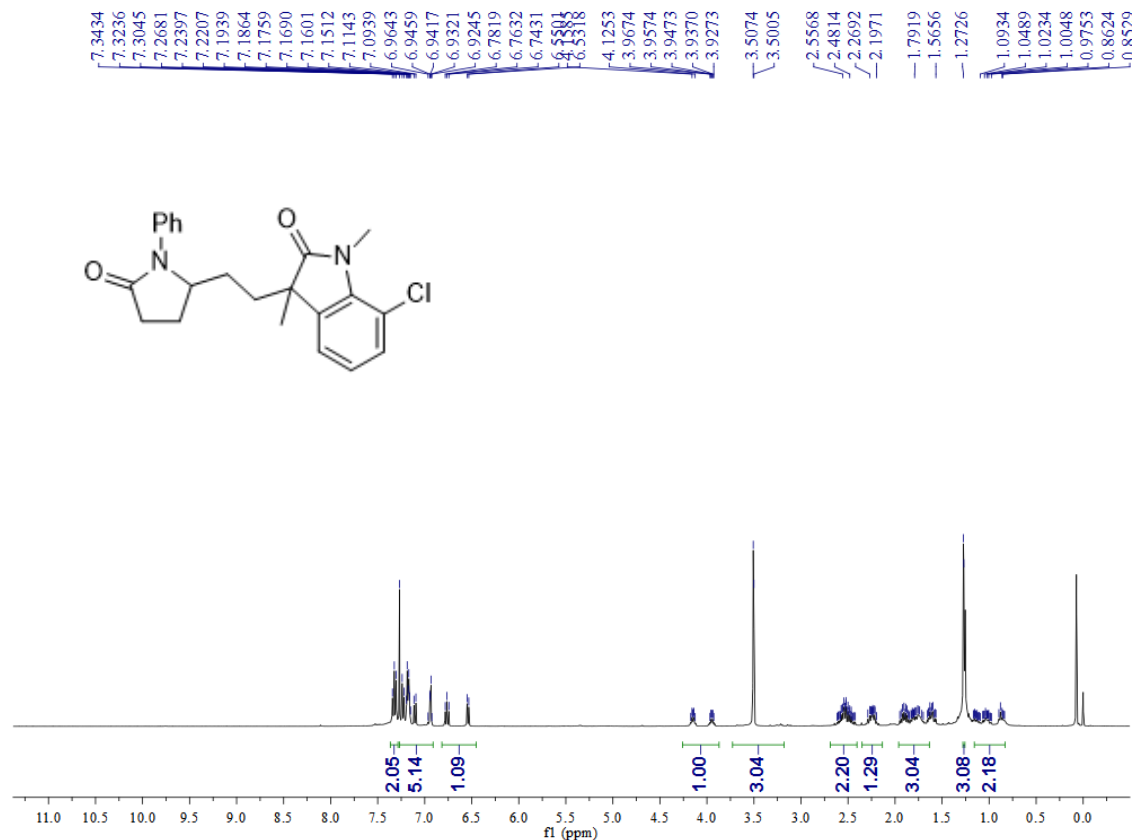

$^{13}\text{C}$  NMR (100 MHz,  $\text{CDCl}_3$ )

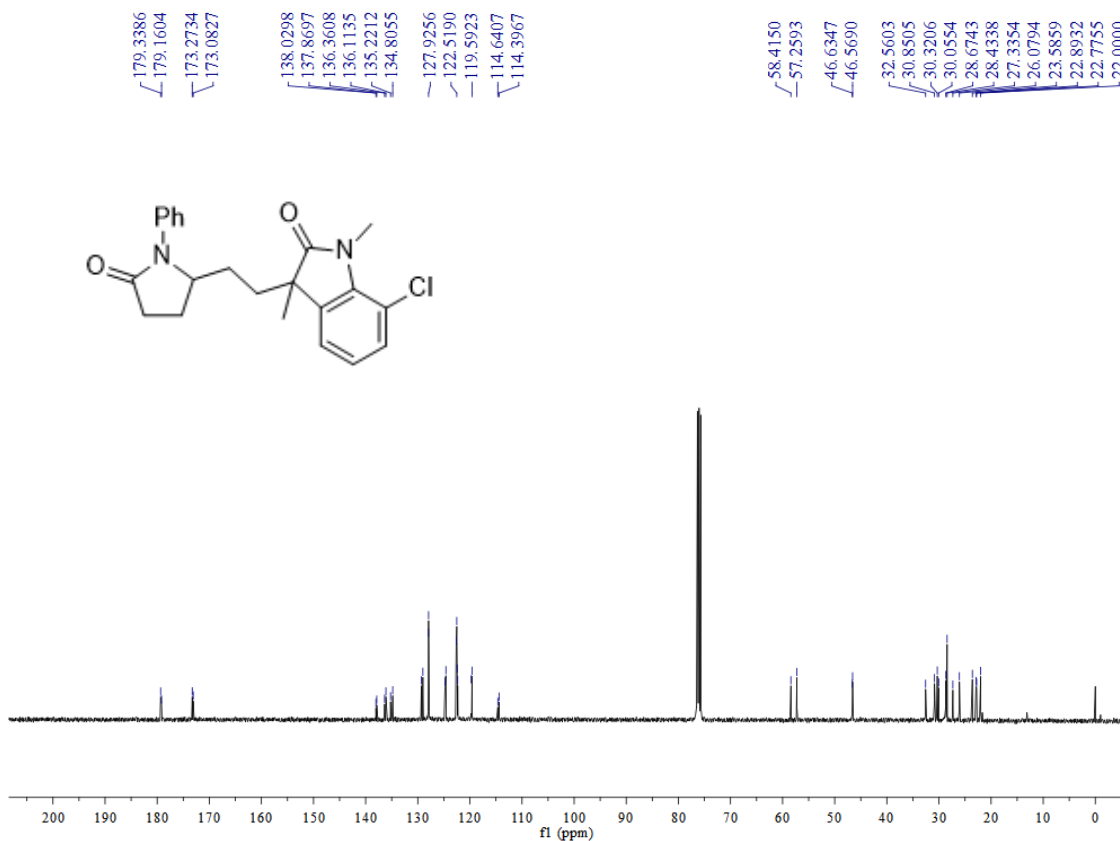

Methyl 1,3-dimethyl-2-oxo-3-(2-(5-oxo-1-phenylpyrrolidin-2-yl)ethyl)indoline-7-carboxylate (3ak)

$^1\text{H}$  NMR (400 MHz,  $\text{CDCl}_3$ )

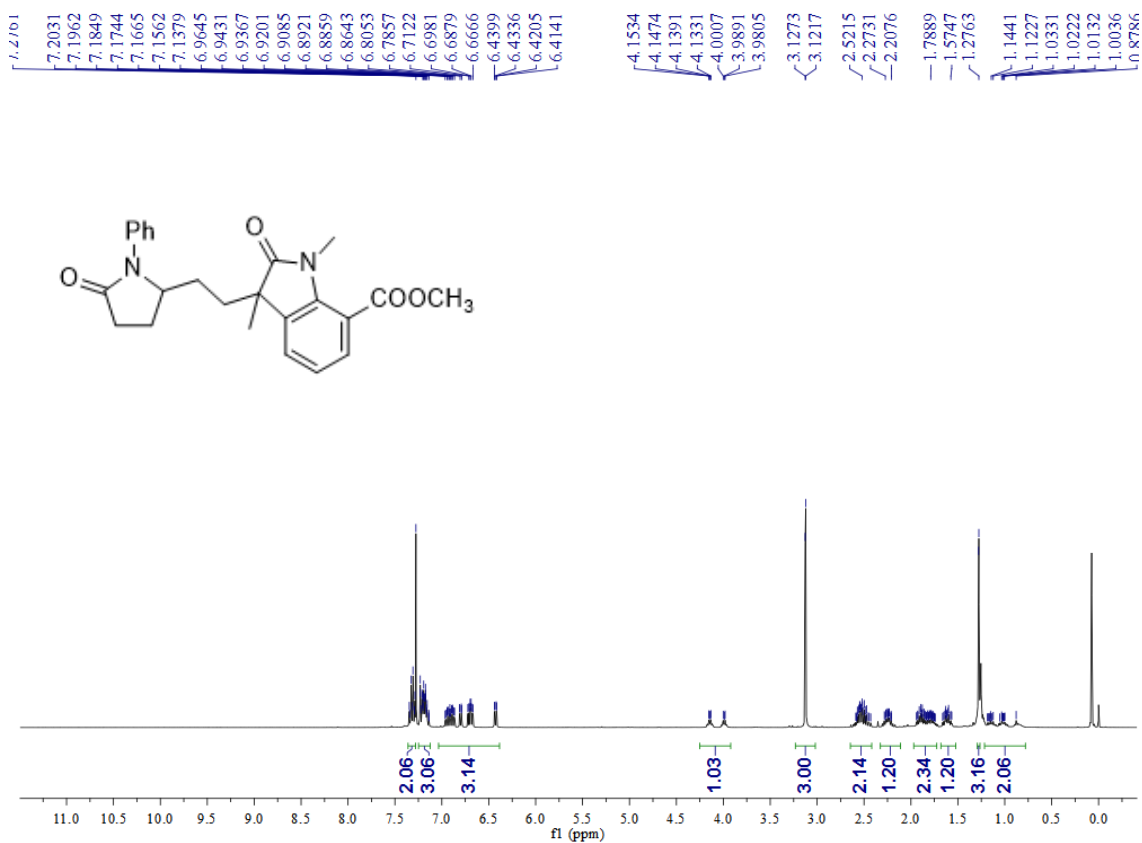

$^{13}\text{C}$  NMR (100 MHz,  $\text{CDCl}_3$ )

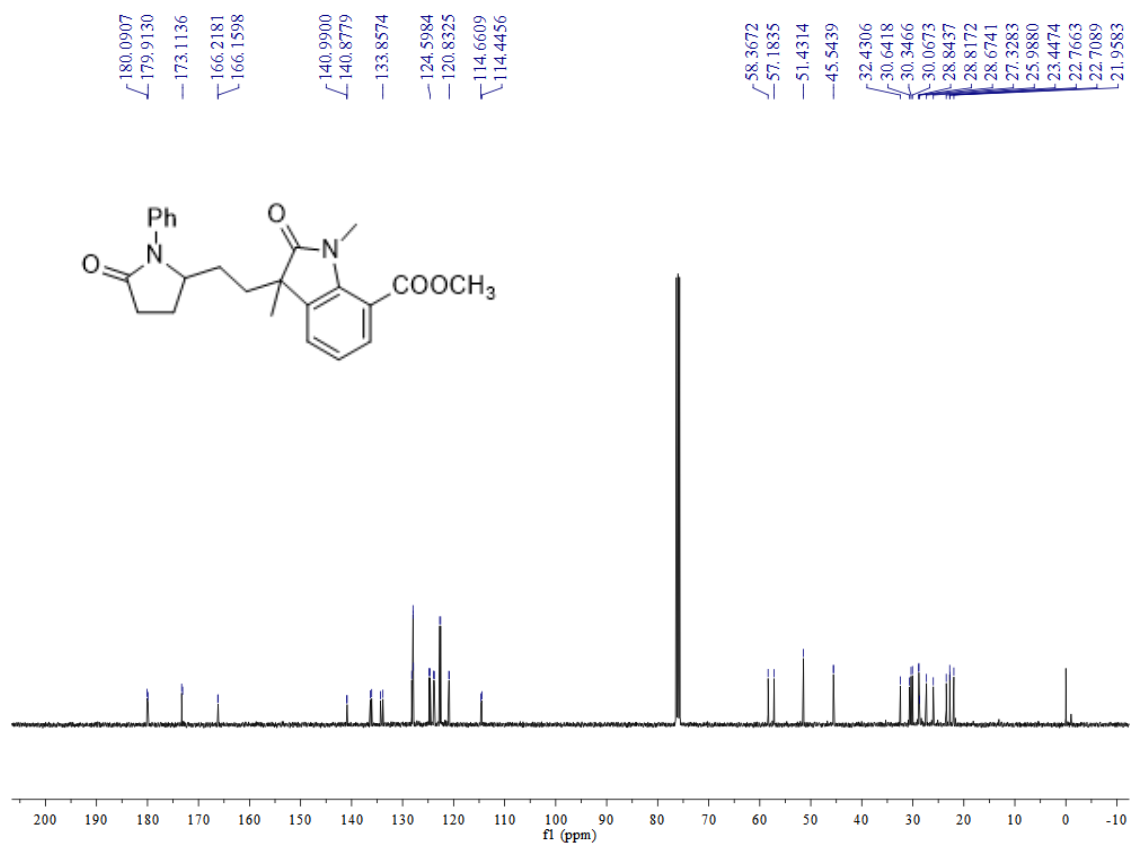

**7-bromo-1,3-dimethyl-3-(2-(5-oxo-1-phenylpyrrolidin-2-yl)ethyl)indolin-2-one (3a)**

$^1\text{H}$  NMR (400 MHz,  $\text{CDCl}_3$ )

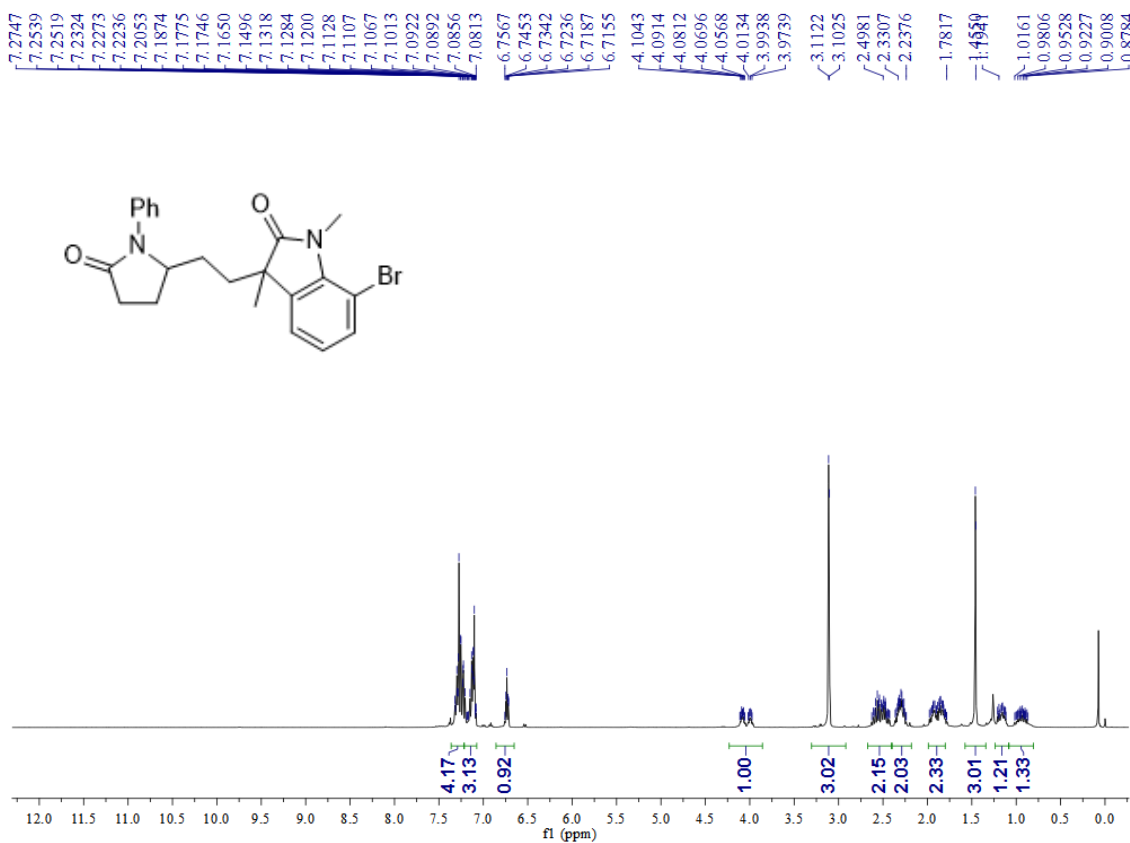



$^{13}\text{C}$  NMR (100 MHz,  $\text{CDCl}_3$ )

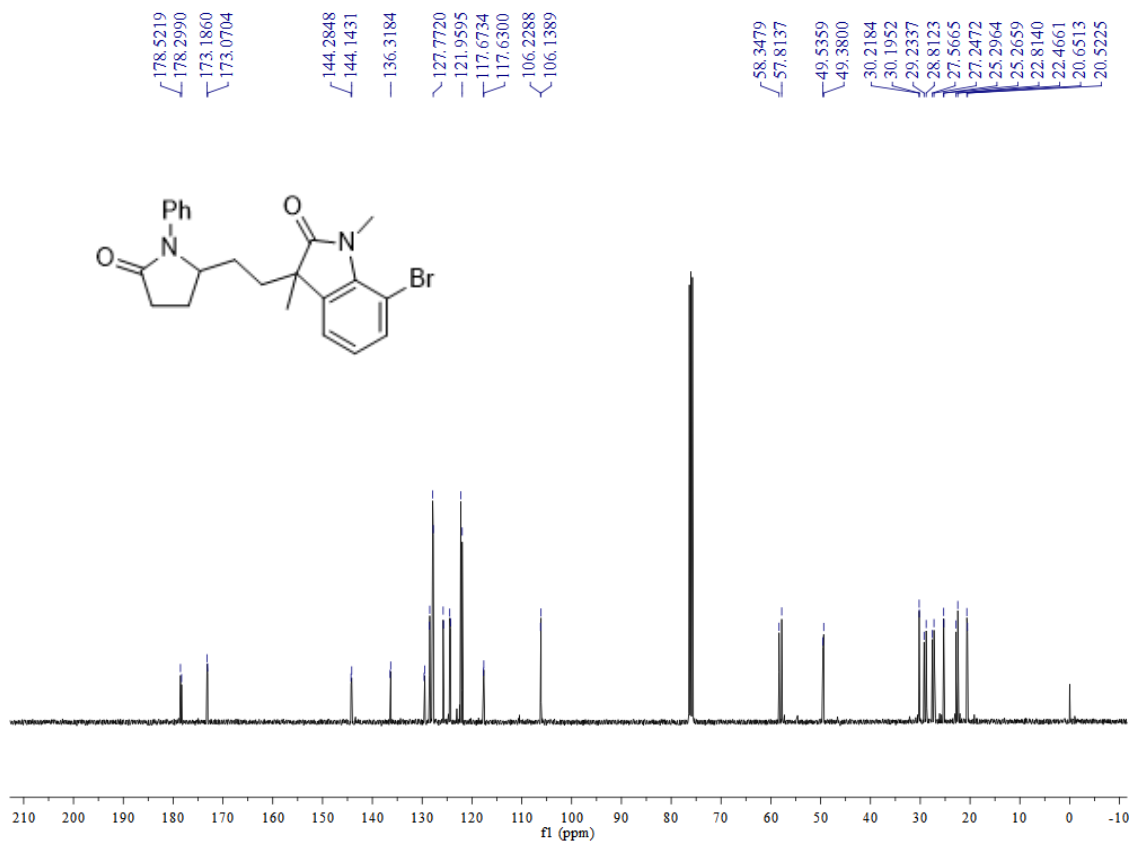

**6-bromo-1,3-dimethyl-3-(2-(5-oxo-1-phenylpyrrolidin-2-yl)ethyl)indolin-2-one (3a1')**

$^1\text{H}$  NMR (400 MHz,  $\text{CDCl}_3$ )

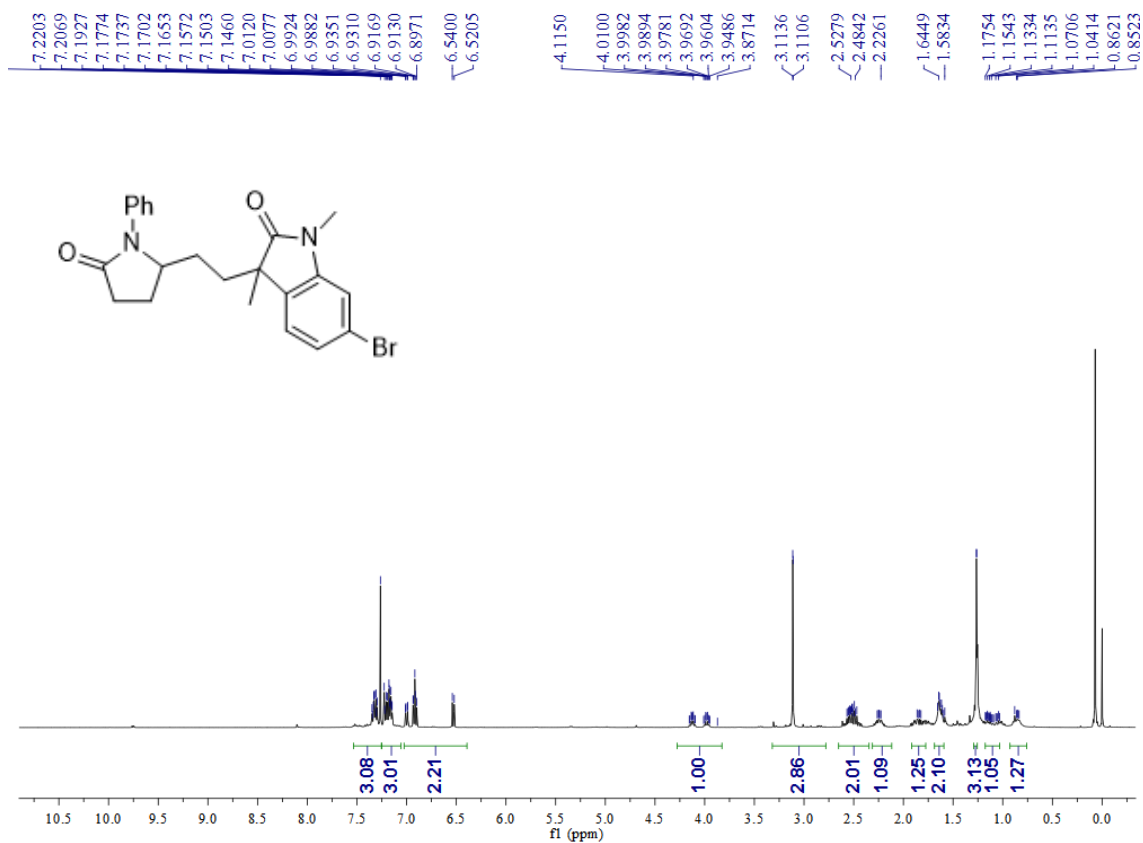

$^{13}\text{C}$  NMR (100 MHz,  $\text{CDCl}_3$ )

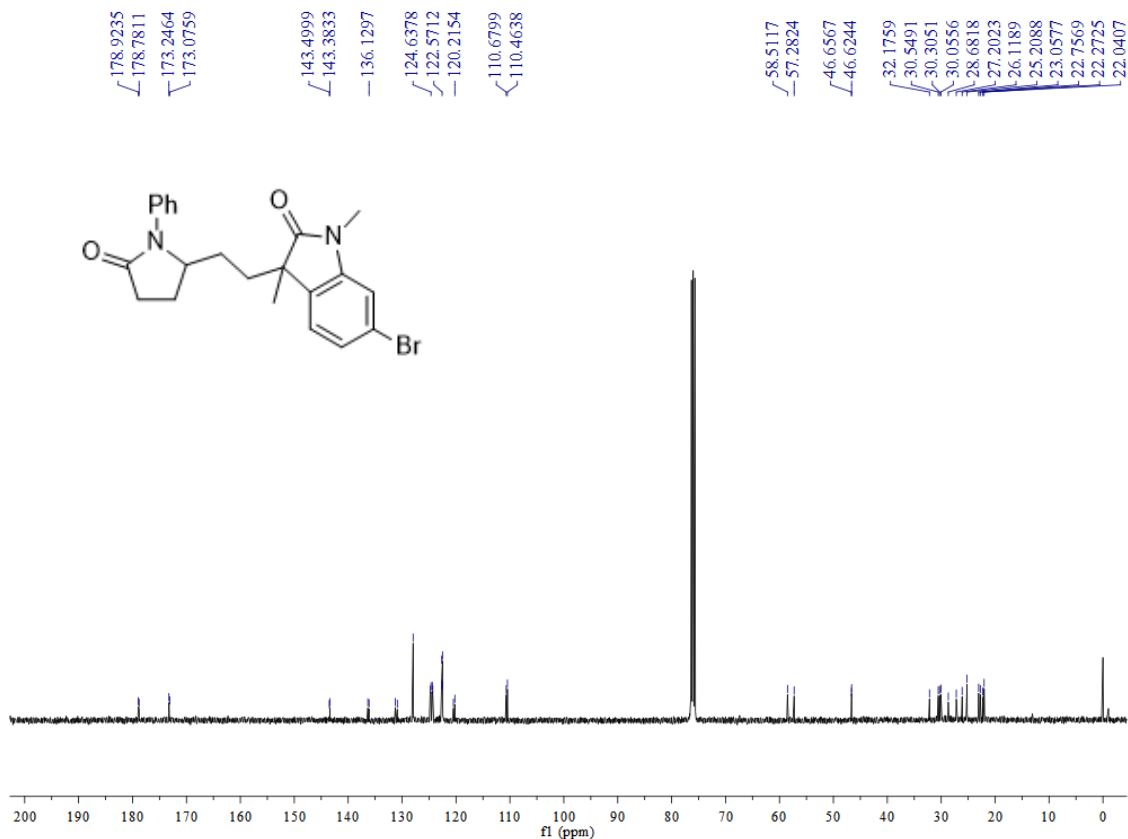

**3-methyl-3-(2-(5-oxo-1-phenylpyrrolidin-2-yl)ethyl)-1-phenylindolin-2-one (3am)**

$^1\text{H}$  NMR (400 MHz,  $\text{CDCl}_3$ )

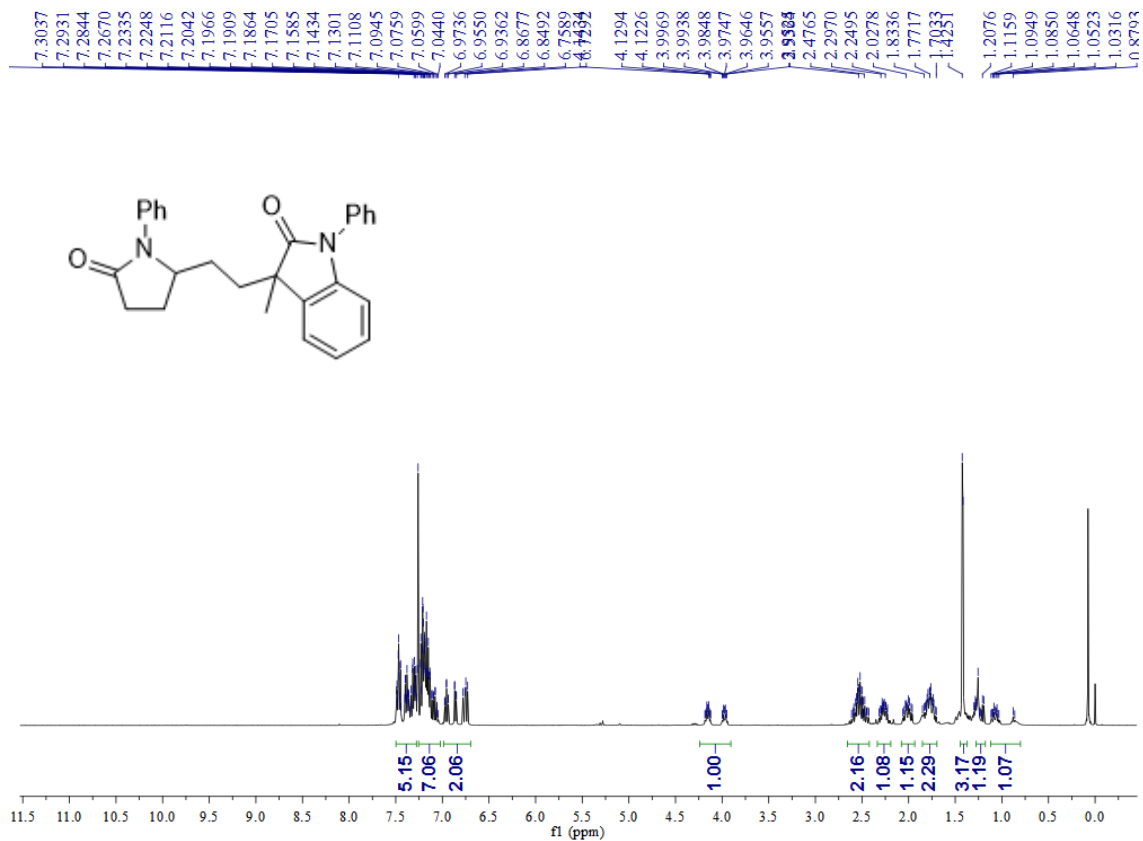

$^{13}\text{C}$  NMR (100 MHz,  $\text{CDCl}_3$ )

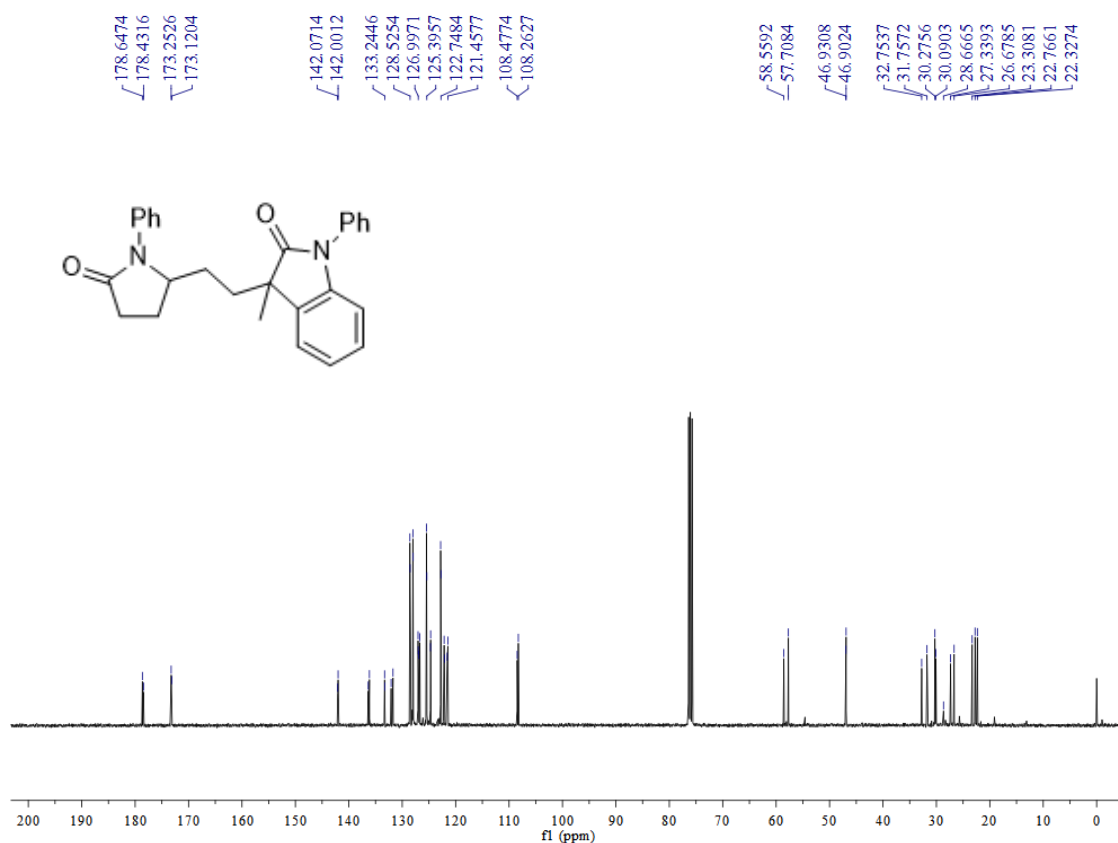

**1-benzyl-3-methyl-3-(2-(5-oxo-1-phenylpyrrolidin-2-yl)ethyl)indolin-2-one (3an)**

$^1\text{H}$  NMR (400 MHz,  $\text{CDCl}_3$ )

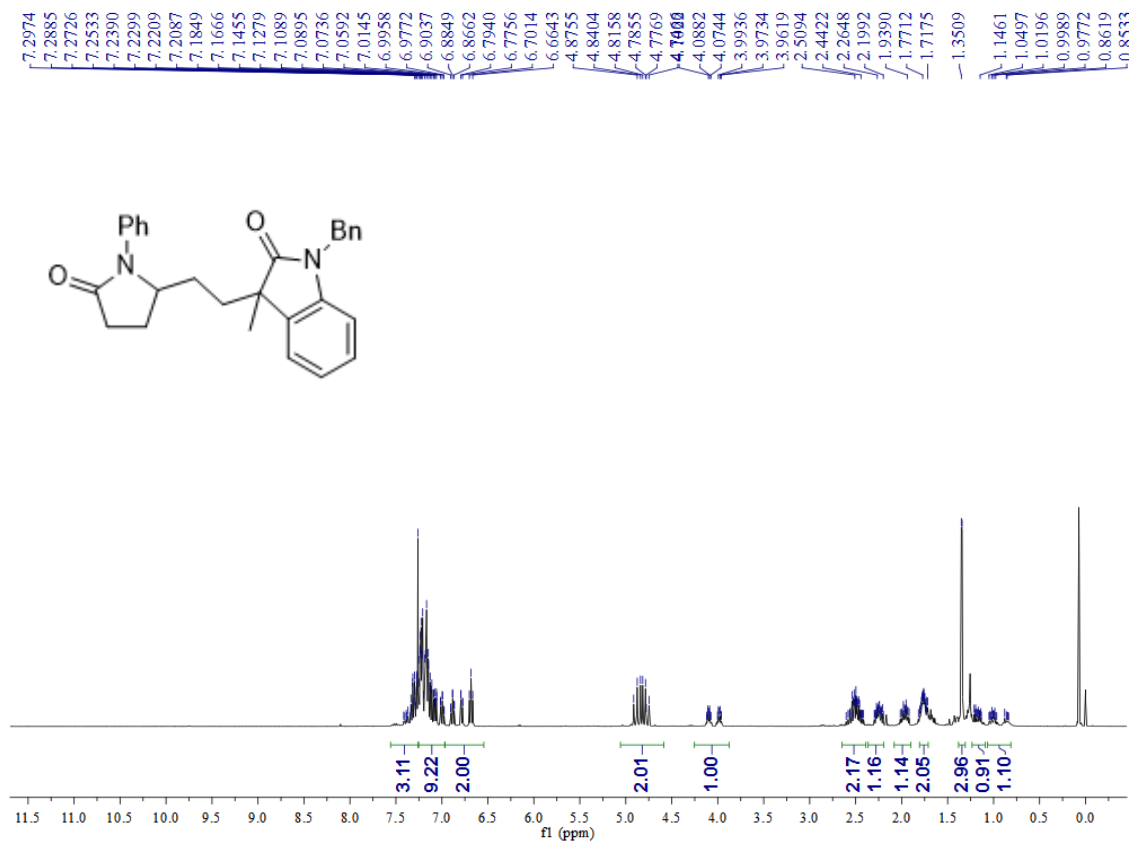



$^{13}\text{C}$  NMR (100 MHz,  $\text{CDCl}_3$ )

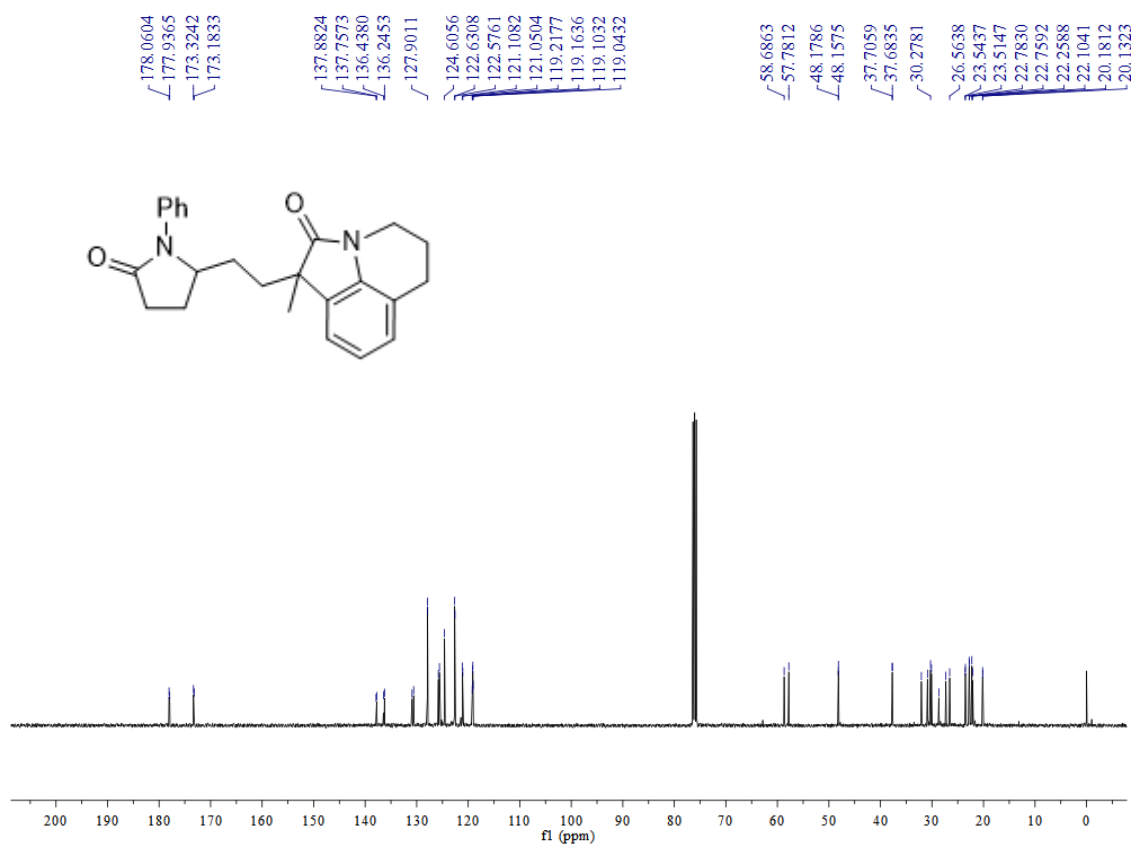

Supplement: d2qo01175a1.pdf [file d2qo01175a1.pdf]
